# Supplementary material
Source: publisher figshare collection journal article supplement (https://acs.figshare.com/ndownloader/files/4293049)
Supplement: Supplementary file 1 [file 4293049]

## Supporting Information

**Isolation and Characterization of Atropisomers of  
Seven-Membered-Ring Benzolactams**

Hidetsugu Tabata, Naoya Wada, Yuko Takada, Tetsuta Oshitari, Hideyo Takahashi, and  
Hideaki Natsugari\*

\*E-mail address: *natsu@pharm.teikyo-u.ac.jp*

**Contents**

|                                                                                                      |             |
|------------------------------------------------------------------------------------------------------|-------------|
| <b>1. General Remarks</b>                                                                            | <b>1</b>    |
| <b>2. Stereochemical (Thermodynamic) Stability of Diastereomers</b>                                  | <b>2–3</b>  |
| <b>3. X-ray crystal structures of 5b, 7a-A (a<i>R,S</i>), 7a-B (a<i>S,S</i>), 7b-A (a<i>R,S</i>)</b> | <b>3–4</b>  |
| <b>4. <sup>1</sup>H NMR spectra (magnified) of 3a, 4a-COOH, 5a-COOH, and 6a-COOH</b>                 | <b>5</b>    |
| <b>5. <sup>1</sup>H NMR spectra (magnified) of 7a-A (a<i>R,S</i>) and 7a-B (a<i>S,S</i>)</b>         | <b>5</b>    |
| <b>6. Temperature dependence of the <sup>1</sup>H NMR signals of 4c</b>                              | <b>6</b>    |
| <b>7. <sup>1</sup>H NMR and <sup>13</sup>C NMR Spectra</b>                                           | <b>7–39</b> |

**1. General Remarks**

NMR Spectra were recorded on a spectrometer at 400 MHz or 600 MHz for <sup>1</sup>H NMR, and 100 MHz or 150 MHz for <sup>13</sup>C NMR. Chemical shifts are given in parts per million (ppm) downfield from tetramethylsilane as an internal standard and coupling constants (*J*) are reported in hertz (Hz). Splitting patterns are abbreviated as follows: singlet (s), doublet (d), triplet (t), quartet (q), quintet (quin) and multiplet (m). The high resolution mass spectra (HRMS) were obtained with an ionization mode of ESI. Melting points were taken on a melting point apparatus and are uncorrected. Optical rotations were determined with a digital polarimeter. Analytical thin layer chromatography was performed on pre-coated, glass-backed silica gel plates. Column chromatography was performed using silica gel (45–60 μm). Extracted solutions were dried over anhydrous MgSO<sub>4</sub> or Na<sub>2</sub>SO<sub>4</sub>. Solvents were evaporated under reduced pressure.

## 2. Stereochemical (Thermodynamic) Stability of Diastereomers

The  $\Delta G^\ddagger$  values were determined according to the protocol reported for the literature: see ref. 17) in the main text.

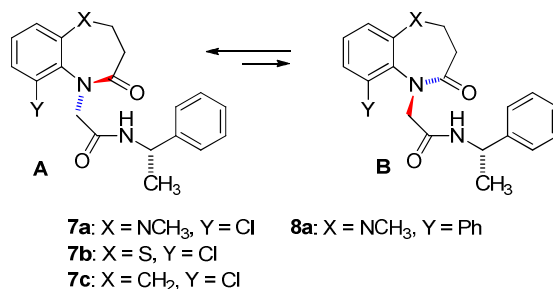

| Compd<br>(axial chirality <sup>a</sup> ) | $\Delta G^\ddagger$<br>kJ/mol | condition for<br>isomerization <sup>b</sup> | equilibrium<br>ratio (A:B) |
|------------------------------------------|-------------------------------|---------------------------------------------|----------------------------|
| <b>7a-A</b> (aR)                         | 102.5                         | 37 °C, 10 h <sup>c</sup>                    | 1:0.7                      |
| <b>B</b> (aS)                            | 99.4                          | 37 °C, 8 h                                  |                            |
| <b>8a-A</b> (aS)                         | 106.9                         | 50 °C, 14 h <sup>d</sup>                    | 1:0.9                      |
| <b>B</b> (aR)                            | 105.8                         | 50 °C, 12 h <sup>e</sup>                    |                            |
| <b>7b-A</b> (aR)                         | 100.8                         | 37 °C, 8 h                                  | 1:0.9                      |
| <b>B</b> (aS)                            | 99.2                          | 37 °C, 7 h                                  |                            |
| <b>7c-A</b> (aR)                         | 101.9                         | 37 °C, 9 h                                  | 1:0.8                      |
| <b>B</b> (aS)                            | 99.8                          | 37 °C, 8 h                                  |                            |

<sup>a</sup> See, ref.14) in the main text. <sup>b</sup> To the equilibrium state in toluene. <sup>c</sup> At 50 °C, 2 h.  
<sup>d</sup> At 37 °C after 7 h, isomerized to 71 % de. <sup>e</sup> At 37 °C after 7 h, isomerized to 60 % de.

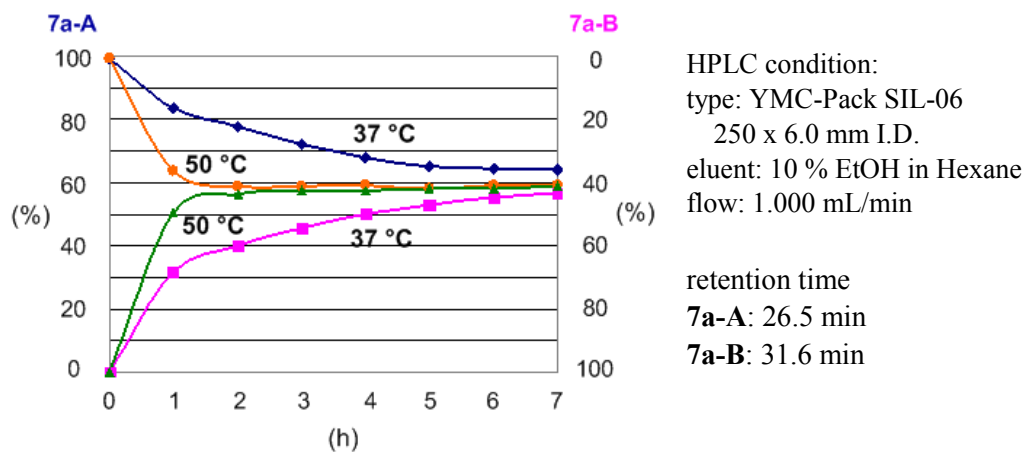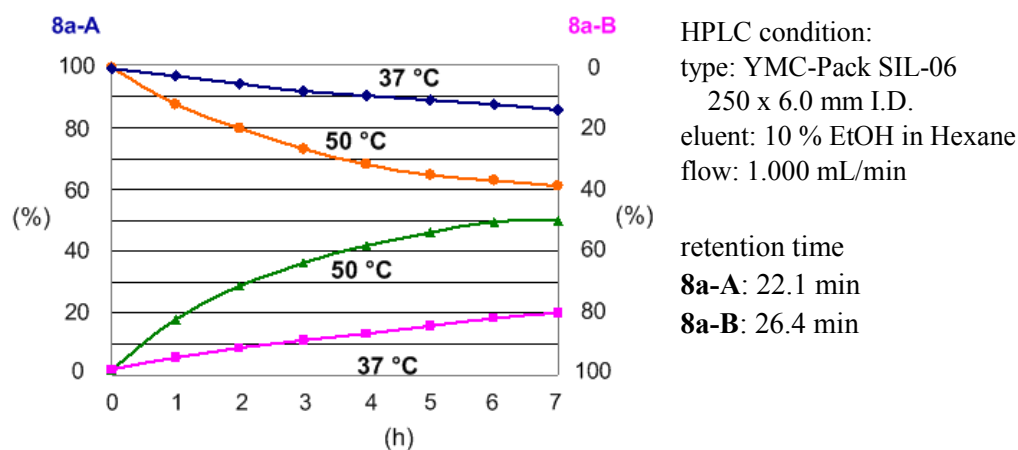

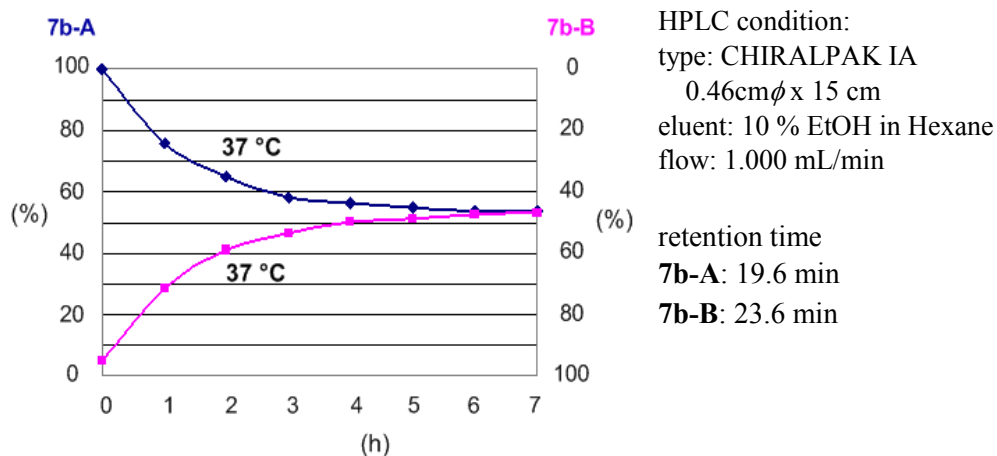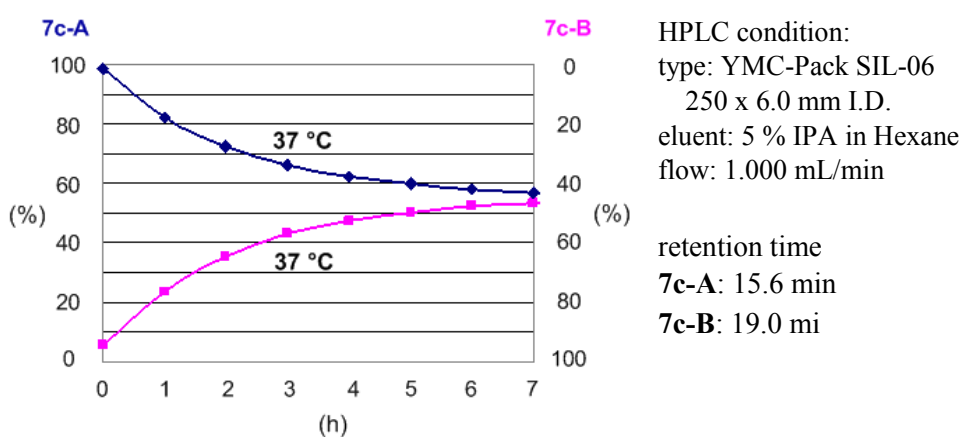

### 3. X-ray crystal structures of **5b**, **7a-A** (*aR,S*), **7a-B** (*aS,S*), **7b-A** (*aR,S*)

**5b** (racemate): (*aR*)-form (left) and (*aS*)-form (right) present in a unit cell.

(note: Structure for **5b** is presented as Figure 4 in the manuscript)

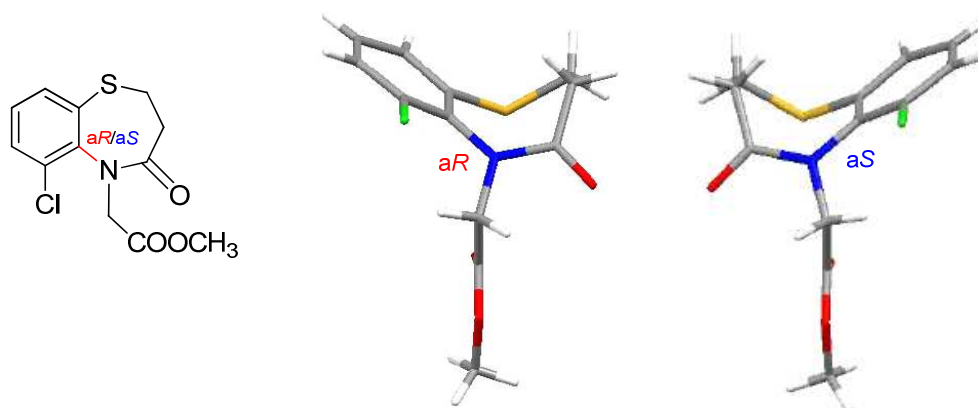

**7a-A (aR,S):** [note: Structure for **7a-A** is presented as Figure 5 (left) and in the manuscript and Table of Contents]

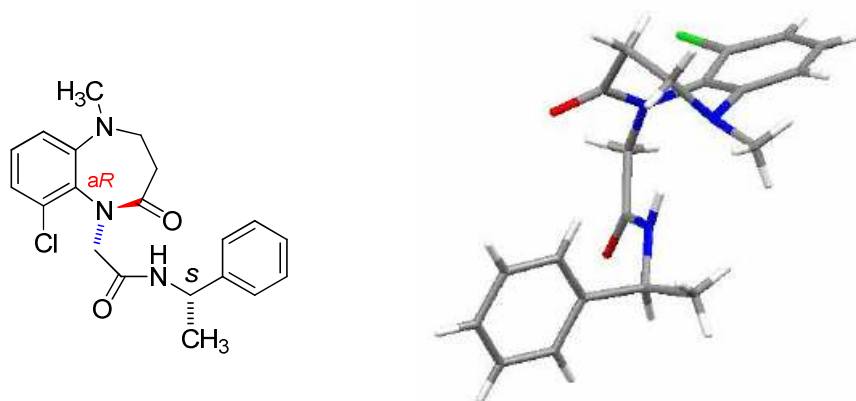

**7a-B (aS,S):** [note: Structure for **7a-B** is presented as Figure 5 (right) in the manuscript and Table of Contents]

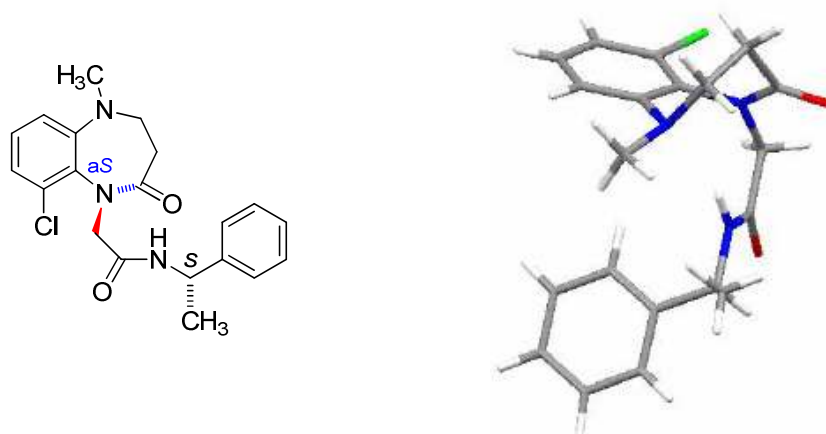

**7b-A (aR,S):** [note: Structure for **7b-A** is presented as Figure 7 in the manuscript]

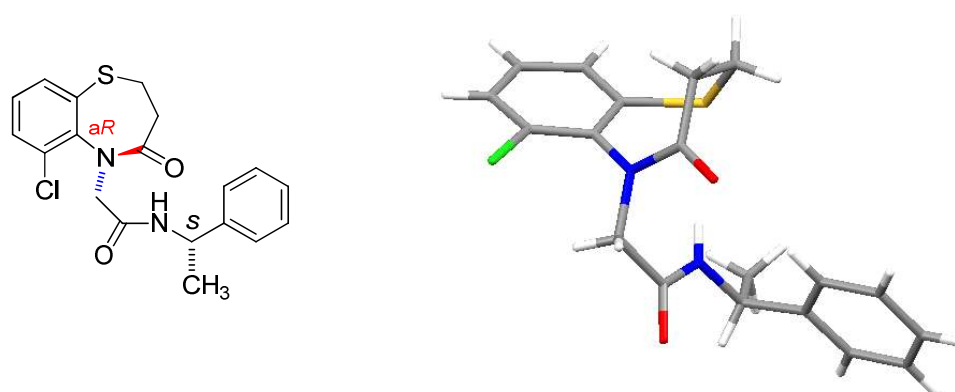

4.  $^1\text{H}$  NMR spectra (magnified) of 3a, 4a-COOH, 5a-COOH, and 6a-COOH (400 MHz,  $\text{CDCl}_3$ )  
(note: This chart is presented as Figure 3 in the manuscript)

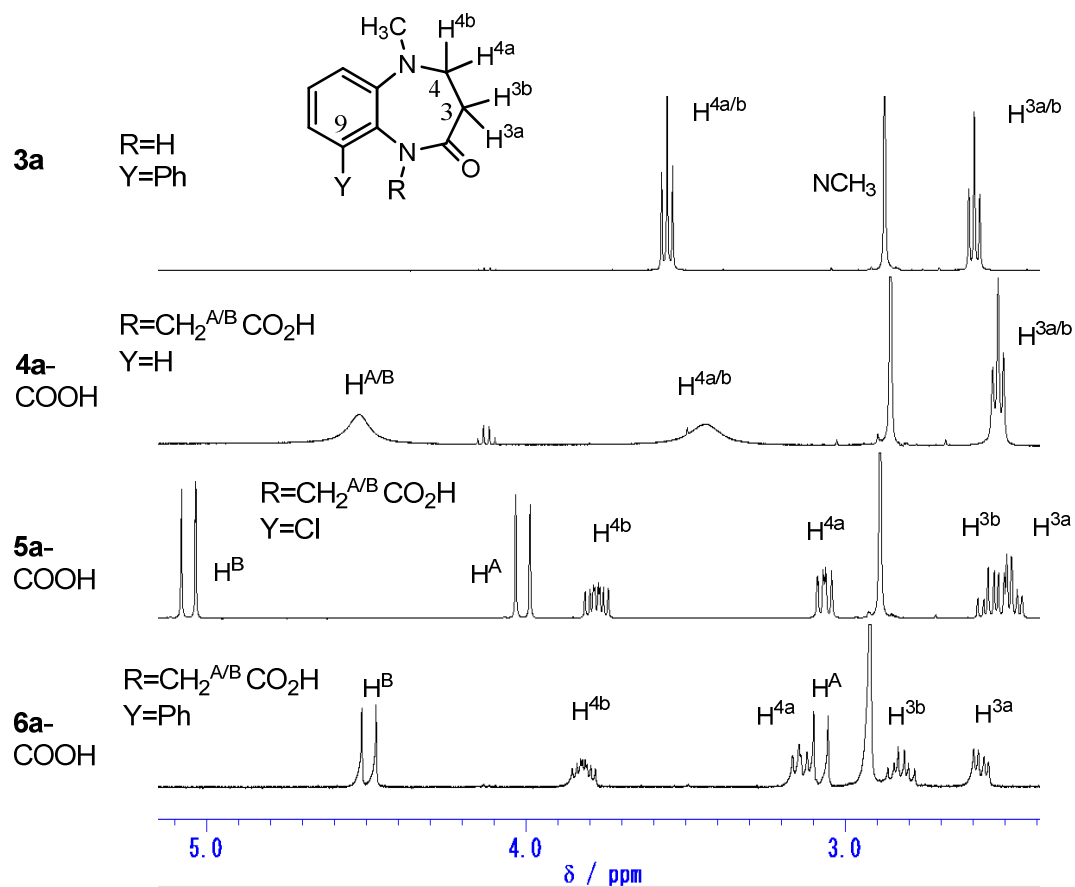

5.  $^1\text{H}$  NMR spectra (magnified) of 7a-A ( $\text{aR},\text{S}$ ) (upper) and 7a-B ( $\text{aS},\text{S}$ ) (lower) (400 MHz,  $\text{CDCl}_3$ )  
(note: This chart is presented as Figure 6 in the manuscript)

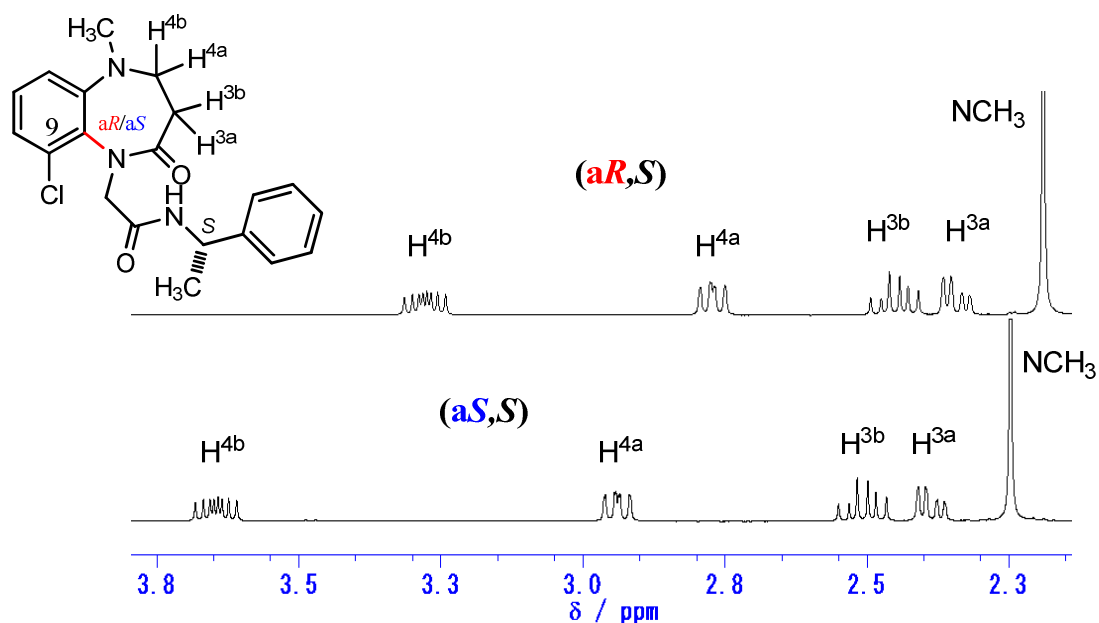

# 6. Temperature dependence of the $^1\text{H}$ NMR signals of **4c** (600 MHz, $\text{CDCl}_3$ )

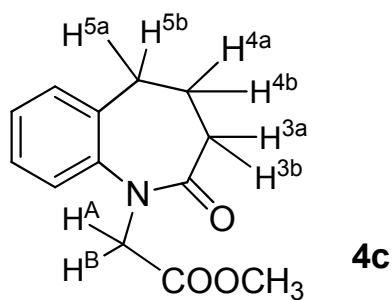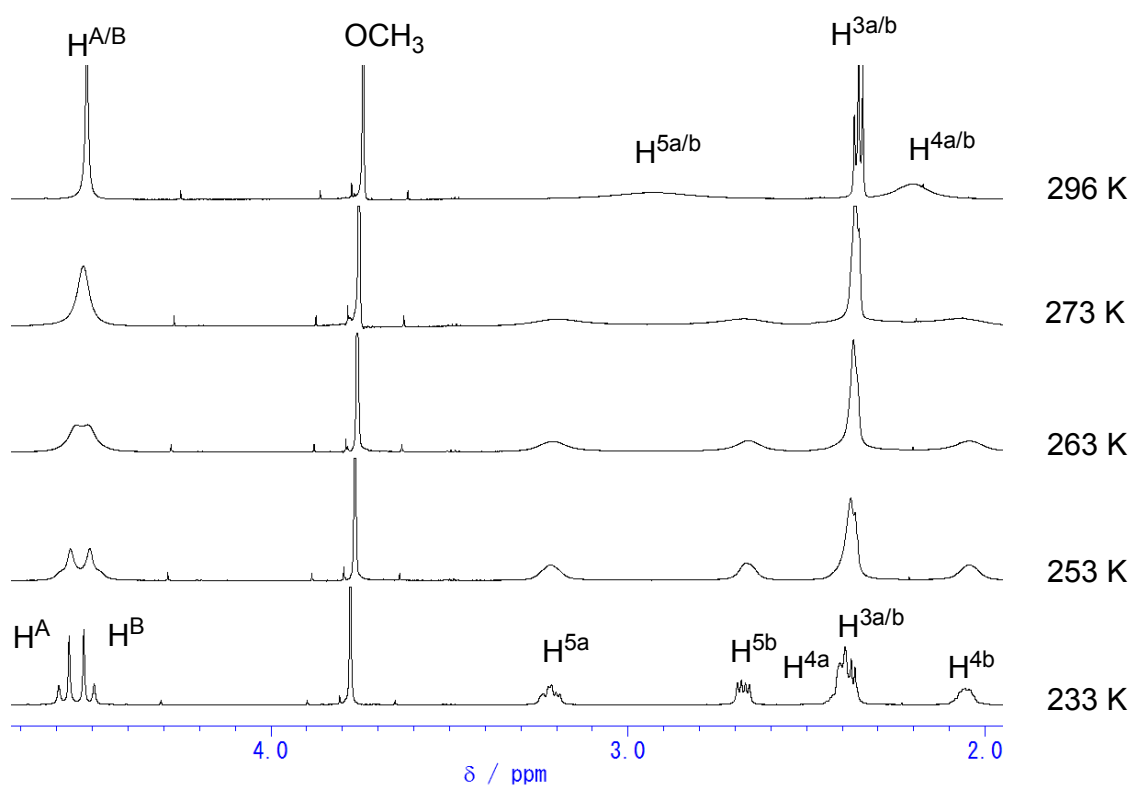

$$\Delta G^\ddagger = 56.3 \text{ kJ/mol}^*$$

$$T_c = 273 \text{ K}$$

\* determined by the method reported by Boiadjev et al.,  
lit. Boiadjev, S. E.; Lightner, D. A. *Tetrahedron* **2002**, 58, 7411–7421.

F:\Wada\42PNW3-44-43.als

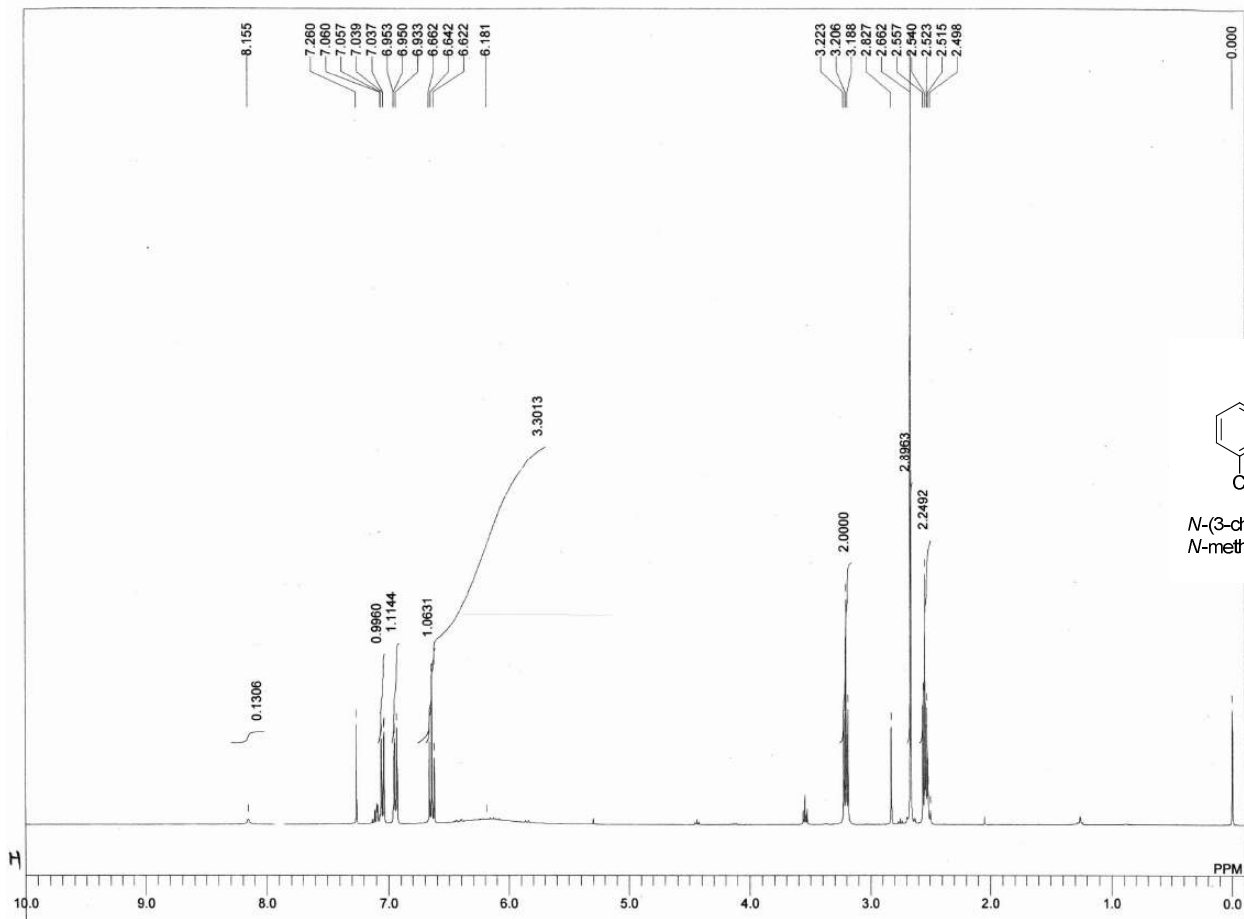

DFILE F:\Wada\42PNW3-  
 COMNT Sun Dec 20 00:37:  
 DATIM 1H  
 OBNUC NON  
 EXMOD 399.65 MHz  
 QBFRQ 124.00 KHz  
 OBSET 10500.0 Hz  
 OBFIN 32768  
 POINT 8000.0 Hz  
 FREQU 16  
 SCANS 4.096 sec  
 ACQTM 2.904 sec  
 PD 6.2 us  
 PW1 1H  
 IRNUC 22.7 c  
 CTEMP CDCL3  
 SLVNT 0.00 ppm  
 EXREF 0.12 Hz  
 BF 16  
 RGAIN

F:\Wada\42PNW2-174-34-carbon.als

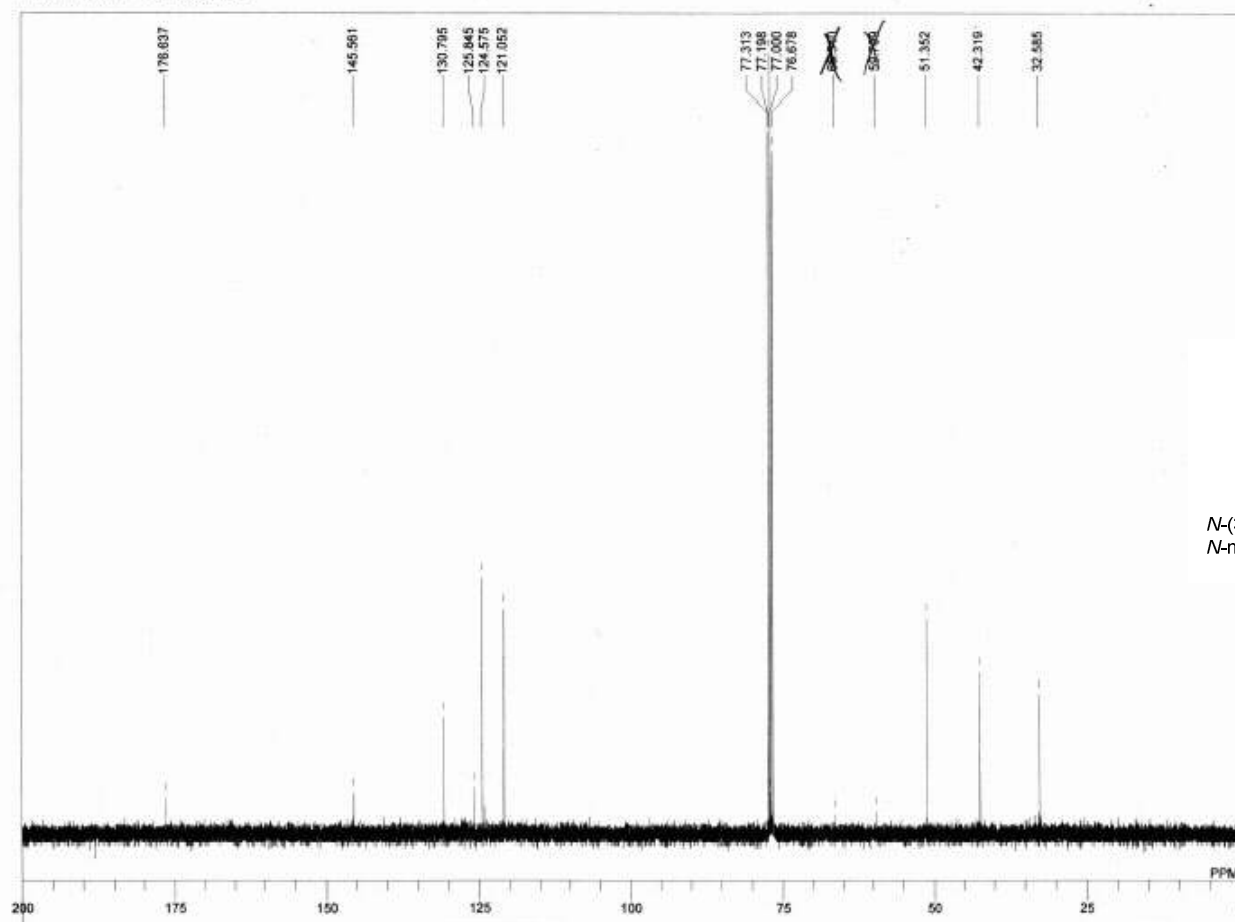

DFILE F:\Wada\42PNW2-  
 COMNT Thu Nov 12 10:50:  
 DATIM 13C  
 OBNUC BCM  
 EXMOD 100.40 MHz  
 QBFRQ 125.00 KHz  
 OBSET 10500.0 Hz  
 OBFIN 32768  
 POINT 27173.9 Hz  
 FREQU 512  
 SCANS 1.206 sec  
 ACQTM 1.794 sec  
 PD 4.6 us  
 PW1 1H  
 IRNUC 22.7 c  
 CTEMP CDCL3  
 SLVNT 77.00 ppm  
 EXREF 0.12 Hz  
 BF 24  
 RGAIN

F:\Wada\42PNW3-57-27.als

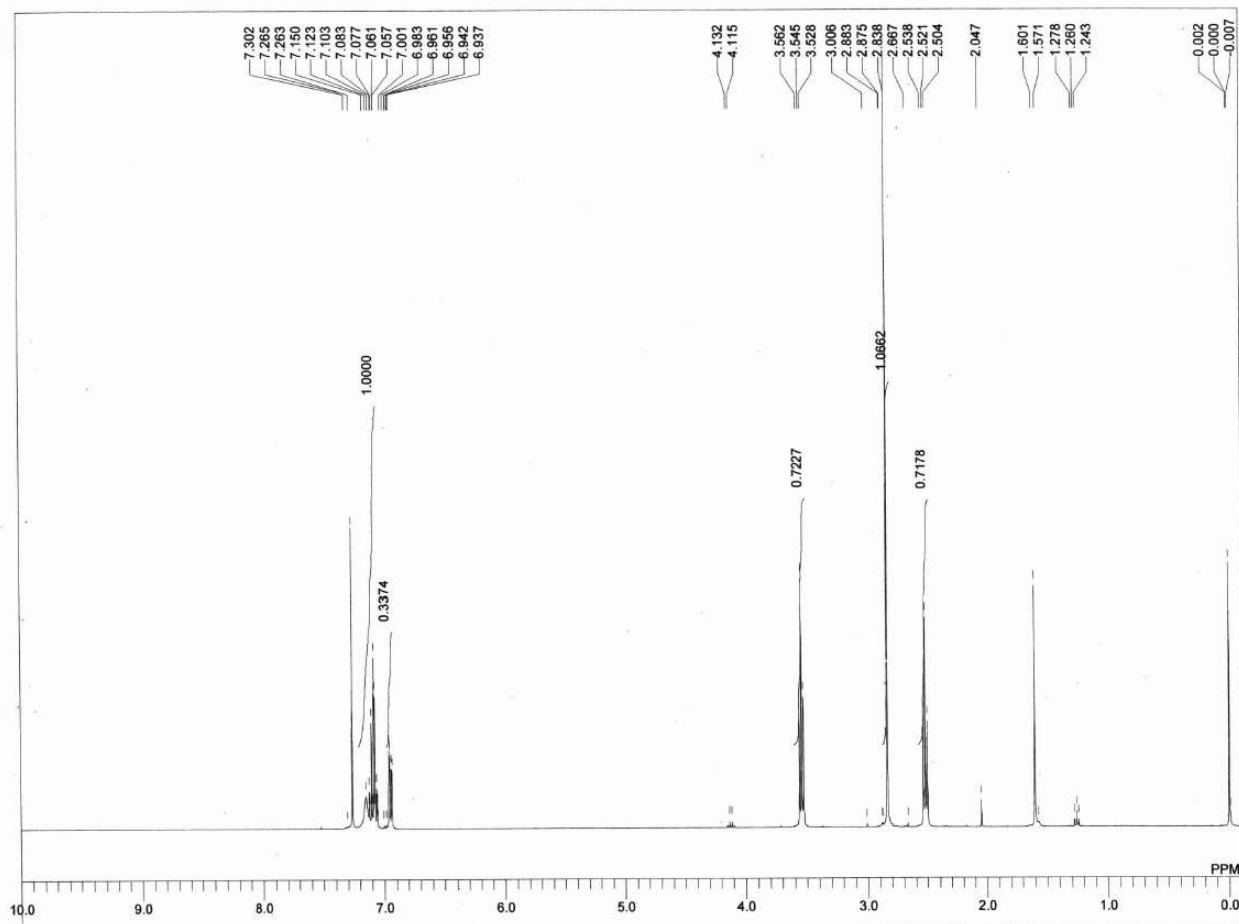

DFILE F:\Wada\42PNW3-  
 COMNT Wed Mar 10 17:32:  
 DATIM 1H  
 OBNUC NON  
 EXMOD 399.65 MHz  
 OBFRQ 124.00 KHz  
 OBSET 10500.0 Hz  
 OBFIN 32768  
 POINT 8000.0 Hz  
 FREQU 16  
 SCANS 4.096 sec  
 ACQTM 2.904 sec  
 PD 6.2 us  
 PW1 1H  
 IRNUC 23.7 c  
 CTMP CDCL3  
 SLVNT 0.00 ppm  
 EXREF 0.12 Hz  
 BF 21  
 RGAIN

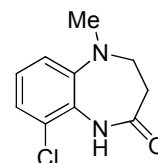

2a

F:\Wada\42PNW2-175-38-carbon.als

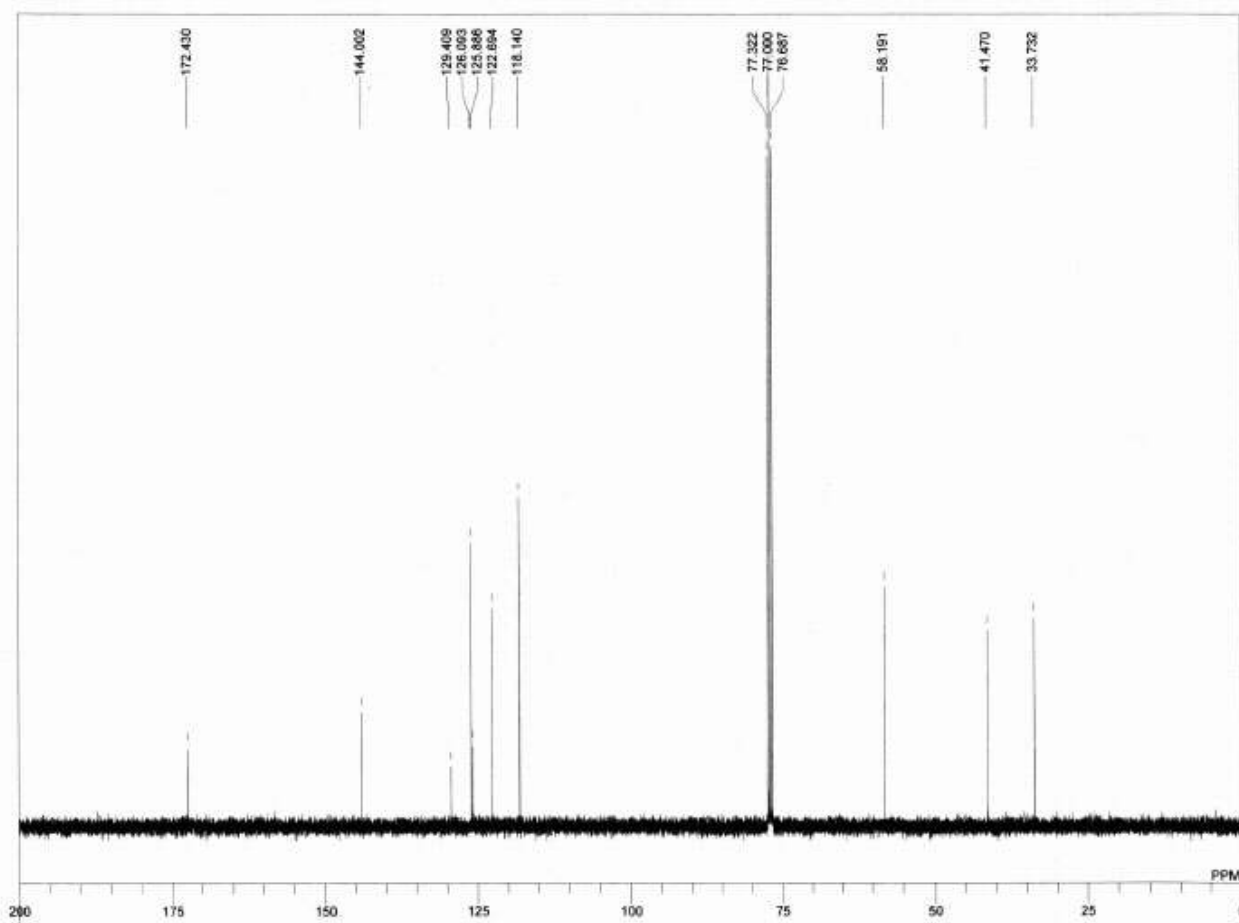

DFILE F:\Wada\42PNW2-  
 COMNT Mon Nov 02 18:35:  
 DATIM 13C  
 OBNUC BCM  
 EXMOD 100.40 MHz  
 OBFRQ 125.00 KHz  
 OBSET 10500.0 Hz  
 OBFIN 32768  
 POINT 27173.9 Hz  
 FREQU 512  
 SCANS 1.206 sec  
 ACQTM 1.794 sec  
 PD 4.6 us  
 PW1 1H  
 IRNUC 22.7 c  
 CTMP CDCL3  
 SLVNT 77.00 ppm  
 EXREF 0.12 Hz  
 BF 24  
 RGAIN

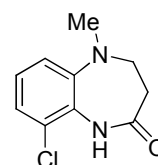

2a



G:\Natsugari\42AHN2-64-32.als

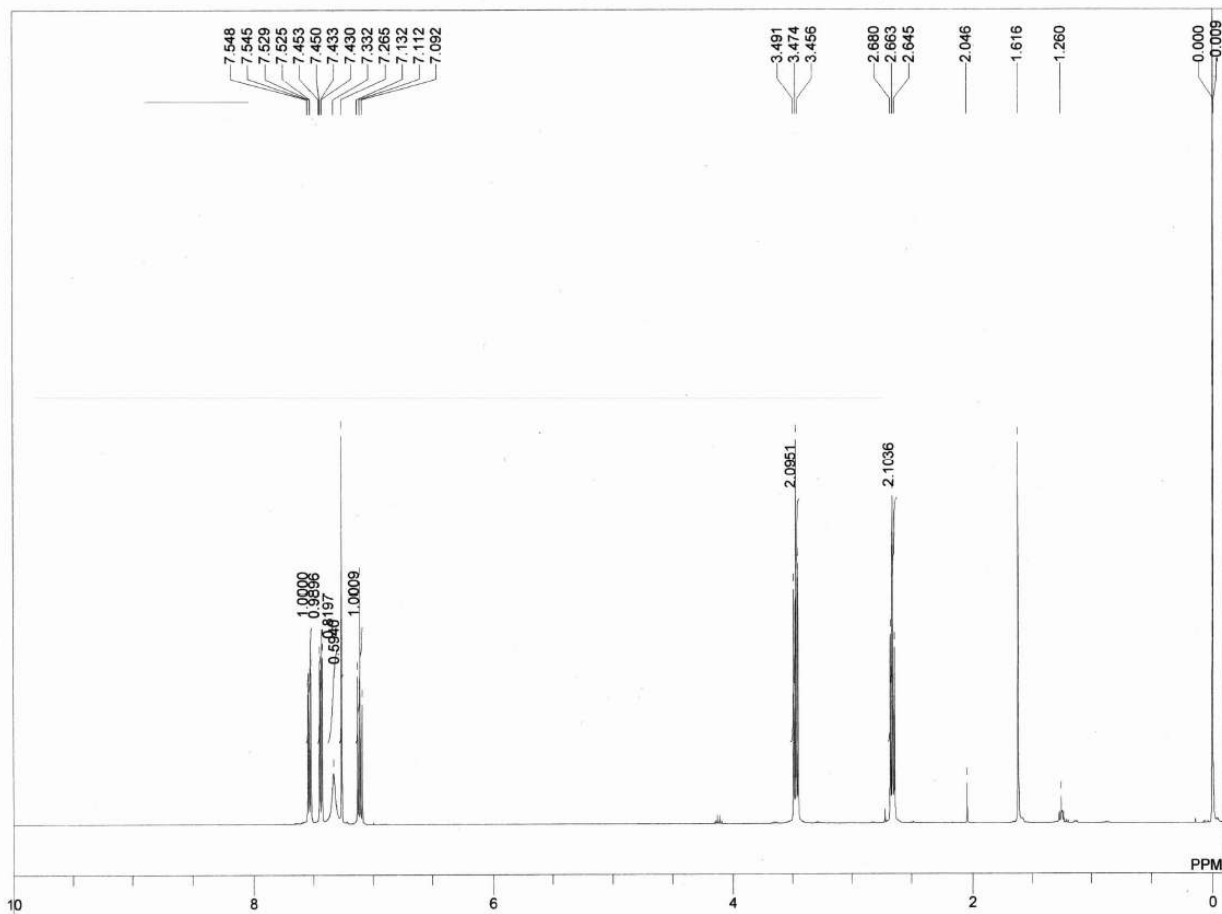

DFILE G:\Natsugari\42AHN2-64-32.als  
 COMNT Thu Dec 27 1  
 DATIM 1H  
 OBNUC NON  
 EXMOD 399.65 MHz  
 OBFREQ 124.00 KHz  
 OBSET 10500.0 Hz  
 OBFIN 32768  
 POINT 8000.0 Hz  
 FREQU 64  
 SCANS 4.096 sec  
 ACQTM 2.904 sec  
 PD 6.2 us  
 PW1 1H  
 IRNUC 23.5 c  
 CTEMP CDCL3  
 SLVNT 0.00 ppm  
 EXREF 0.12 Hz  
 BF 20  
 RGAIN

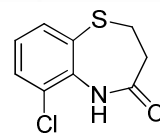

2b

F:\Takada\carbon\_DEFAULT.als

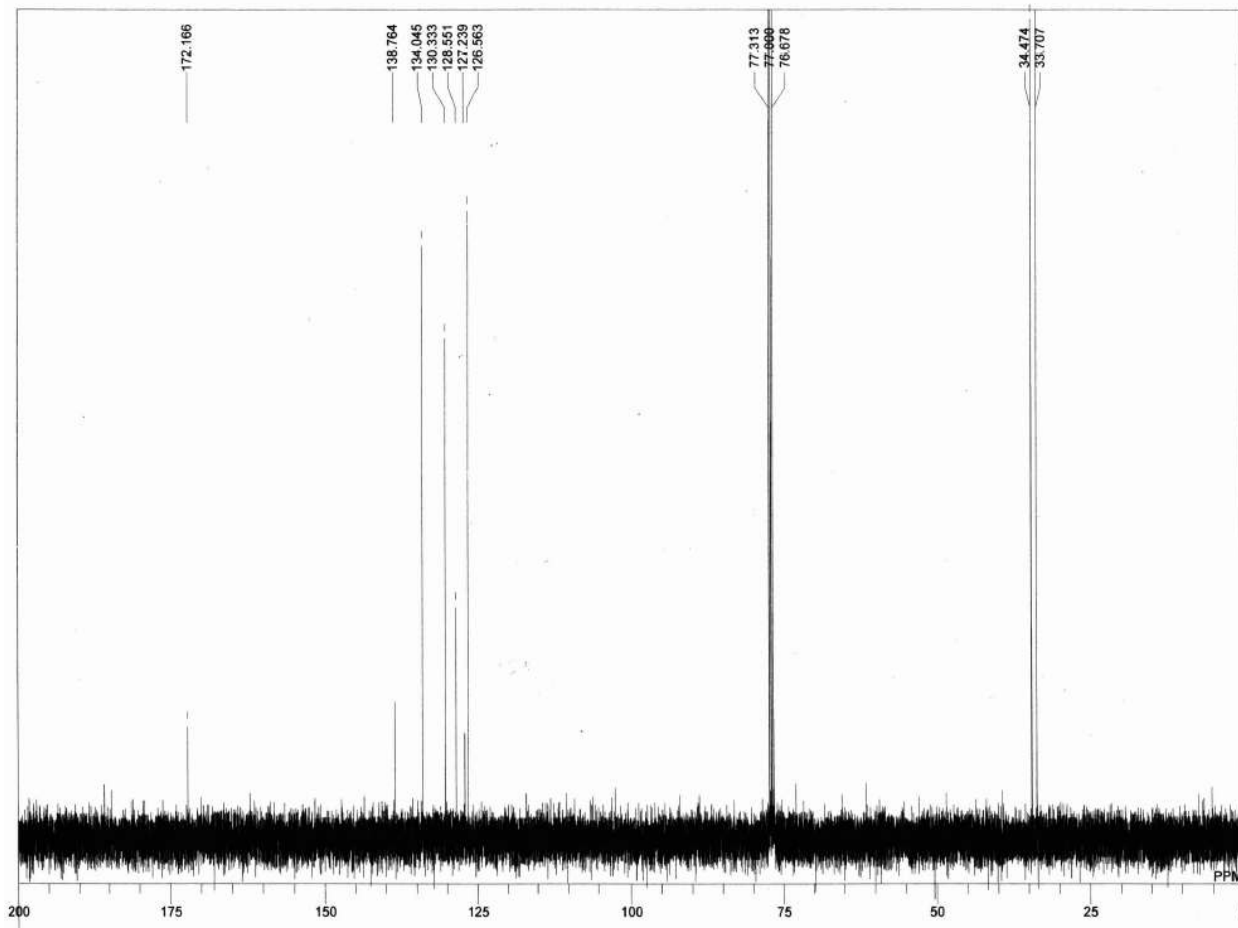

DFILE F:\Takada\carbon\_DEFAULT.als  
 COMNT Tue Aug 10 09:2  
 DATIM 13C  
 OBNUC BCM  
 EXMOD 100.40 MHz  
 OBFREQ 125.00 KHz  
 OBSET 10500.0 Hz  
 OBFIN 32768  
 POINT 27173.9 Hz  
 FREQU 200  
 SCANS 1.208 sec  
 ACQTM 1.794 sec  
 PD 4.6 us  
 PW1 1H  
 IRNUC 24.8 c  
 CTEMP CDCL3  
 SLVNT 77.00 ppm  
 EXREF 0.12 Hz  
 BF 25  
 RGAIN

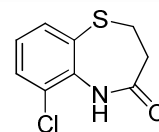

2b

F:\Tabata\1442JHN2-108-25H.ais

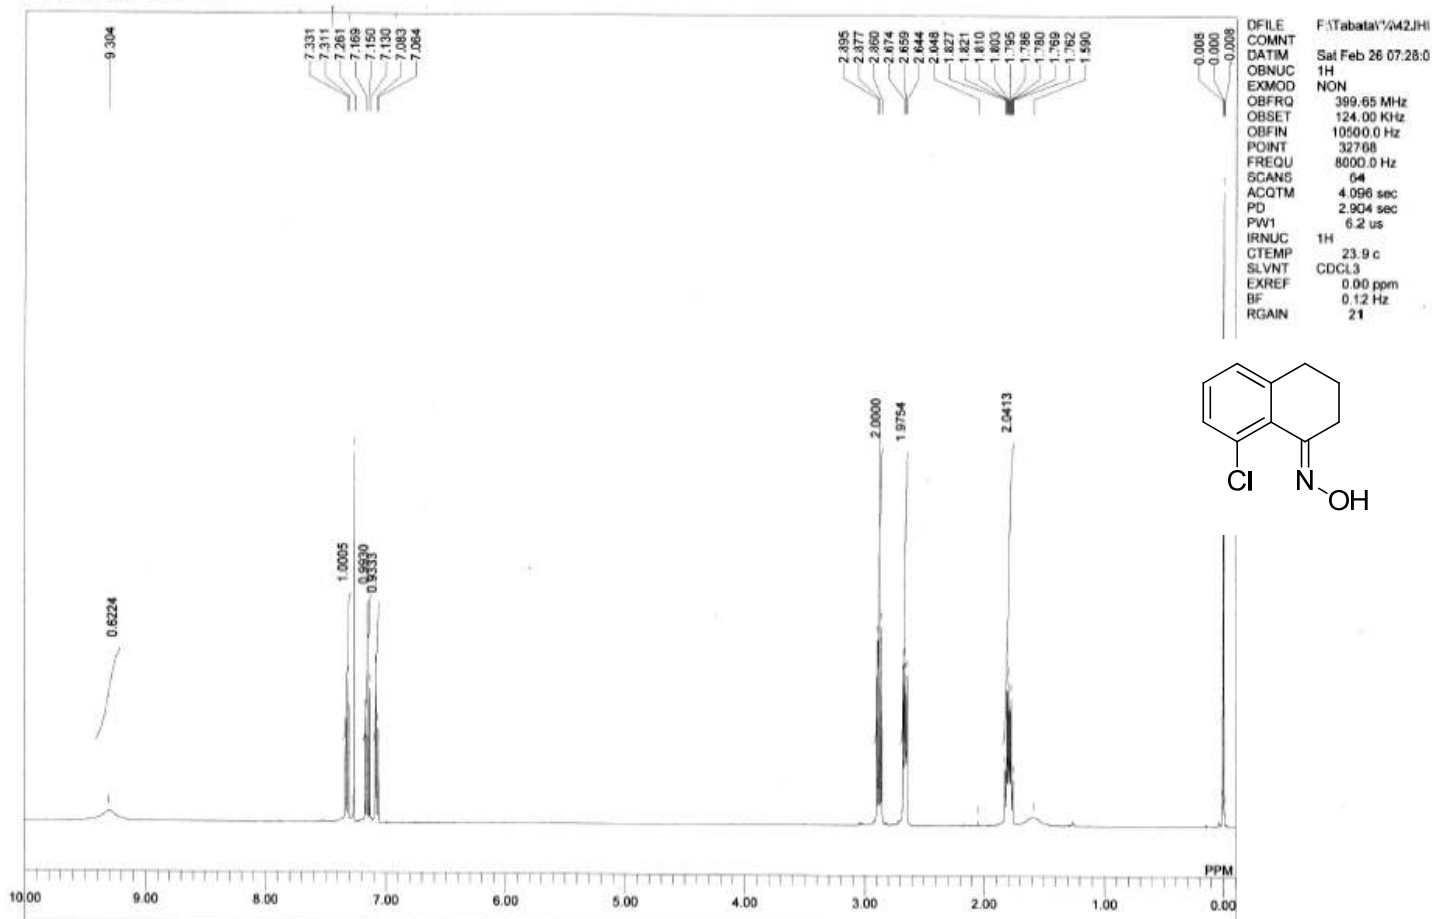

F:\Tabata\1442JHN2-108-25C.ais

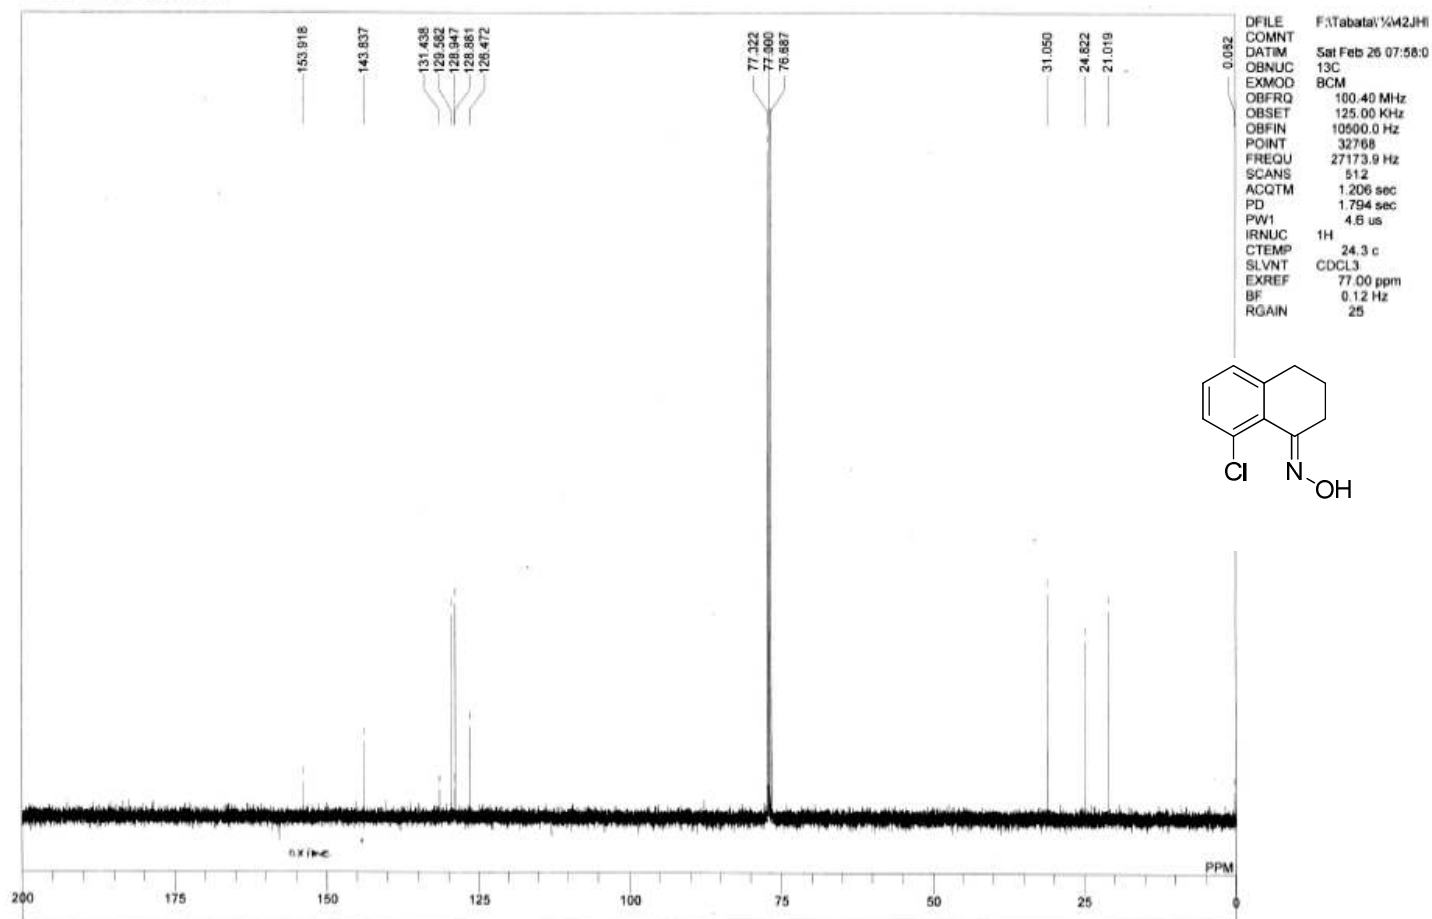

F:\Takada\42Y-YT1-87-18.als

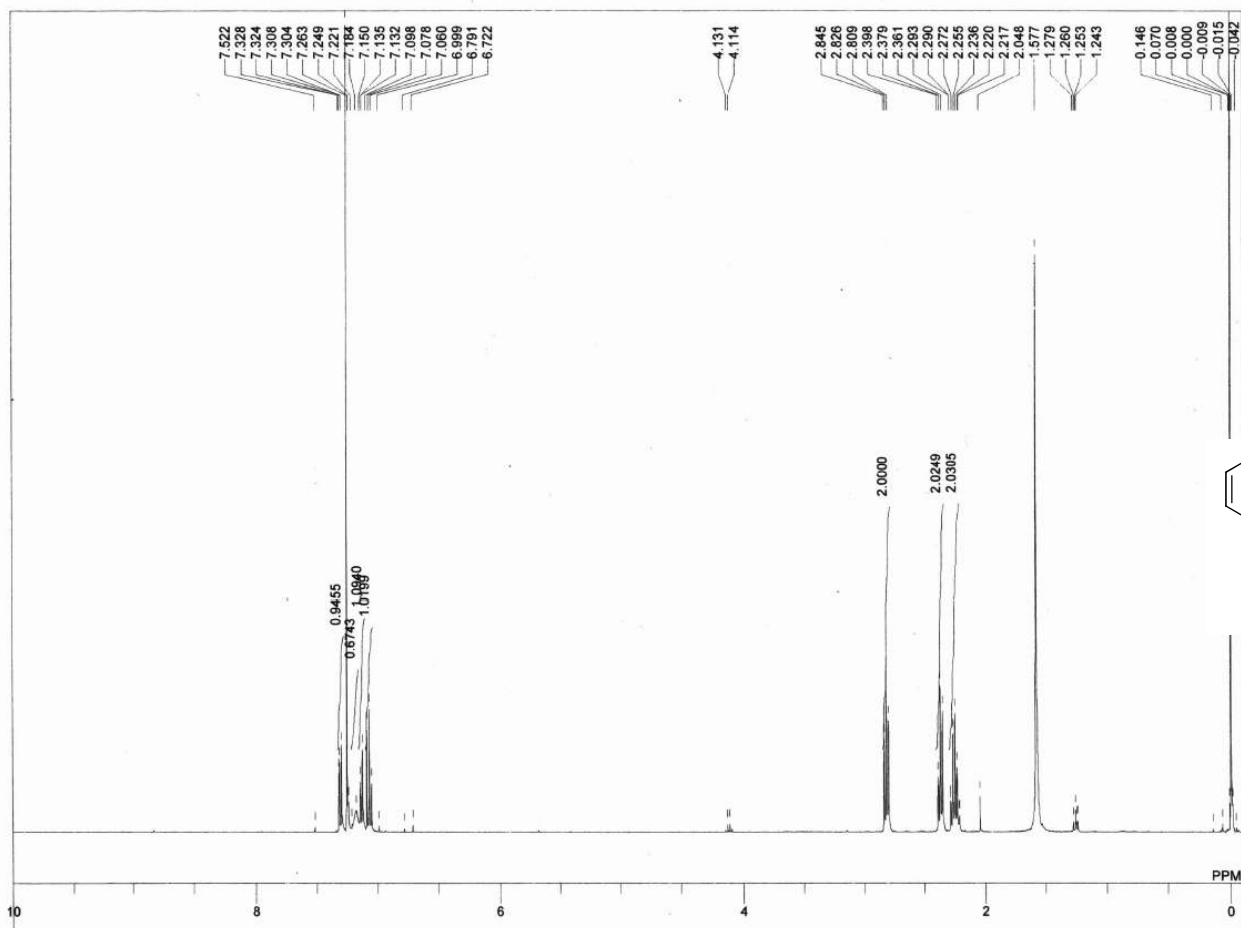

DFILE F:\Takada\42Y  
COMNT Sat Aug 29 14  
DATIM 1H  
OBNUC 1H  
EXMOD NON  
OBFRQ 399.65 MHz  
OBSET 124.00 KHz  
OBFIN 10500.0 Hz  
POINT 32768  
FREQU 8000.0 Hz  
SCANS 32  
ACQTM 4.096 sec  
PD 2.904 sec  
PW1 6.2 us  
IRNUC 1H  
CTEMP 22.7 c  
SLVNT CDCL3  
EXREF 0.00 ppm  
BF 0.12 Hz  
RGAIN 25

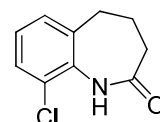

2c

F:\Tabata\42JHN2-109-39C.als

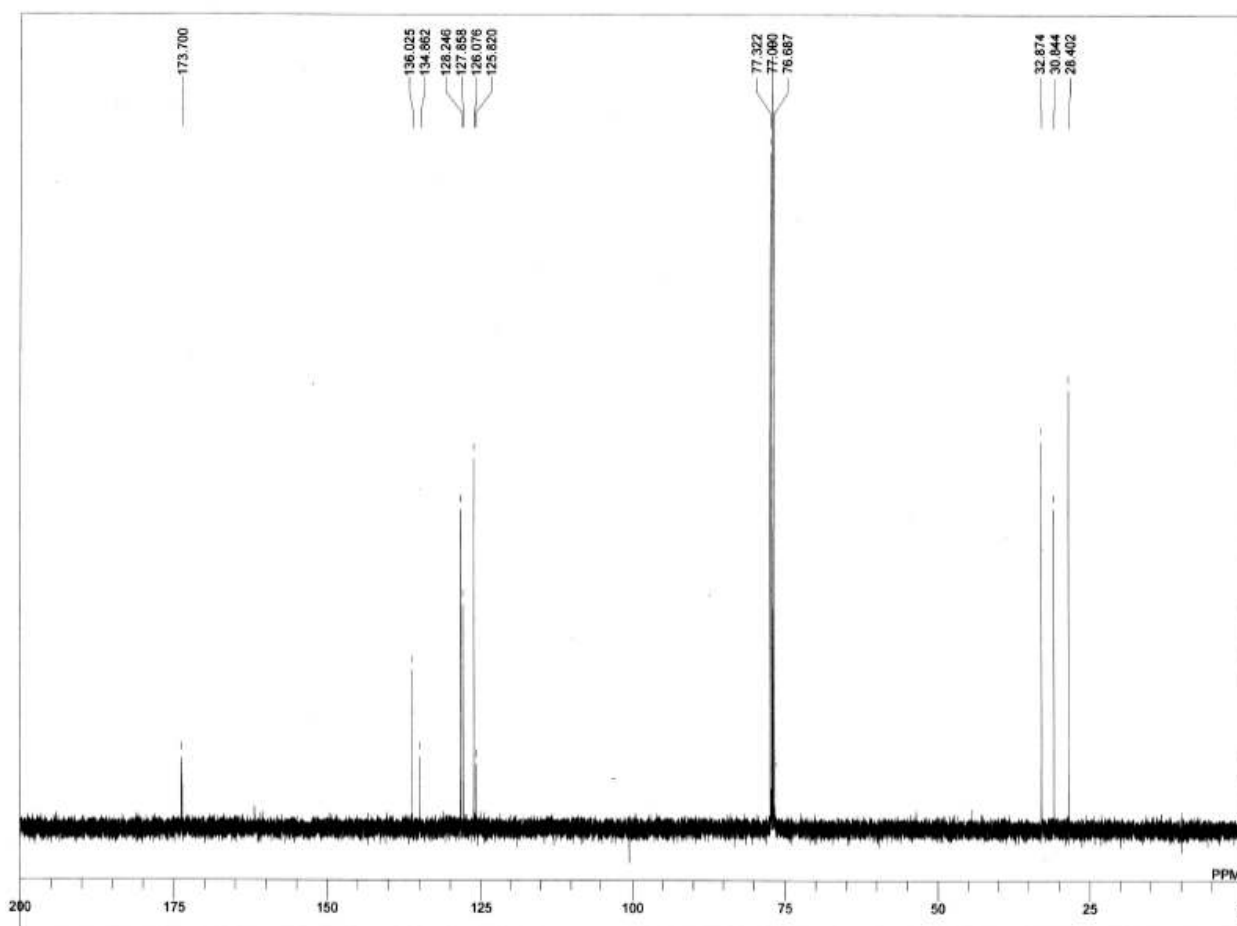

DFILE F:\Tabata\42JHN  
COMNT Fri Feb 25 16:59:3  
DATIM 13C  
OBNUC 13C  
EXMOD BCM  
OBFRQ 100.40 MHz  
OBSET 125.00 KHz  
OBFIN 10500.0 Hz  
POINT 32768  
FREQU 27173.9 Hz  
SCANS 512  
ACQTM 1.206 sec  
PD 1.794 sec  
PW1 4.6 us  
IRNUC 1H  
CTEMP 24.4 c  
SLVNT CDCL3  
EXREF 77.00 ppm  
BF 0.12 Hz  
RGAIN 24

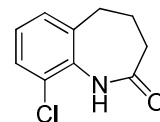

2c

F:\Natsugar\42AHN2-106-25.ais  
42AHN2-106-25

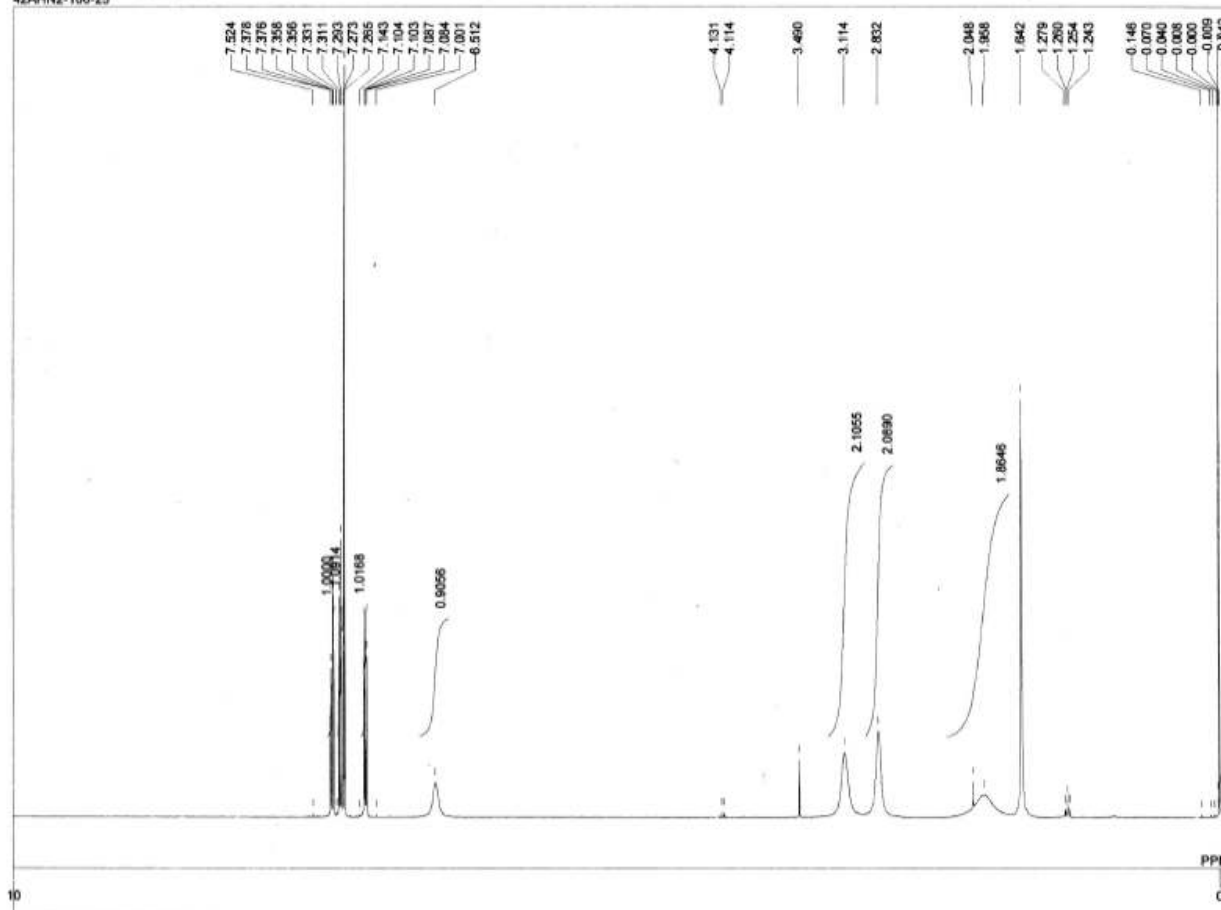

DFILE F:\Natsugar\42AHN2-106-25.ais  
COMNT 42AHN2-106-25  
DATIM Mon Aug 24 08:15:  
OBNUC 1H  
EXMOD NON  
OBFRQ 399.65 MHz  
OBSET 124.00 KHz  
OBFIN 10500.0 Hz  
POINT 32768  
FREQU 8000.0 Hz  
SCANS 32  
ACQTM 4.096 sec  
PD 2.904 sec  
PW1 6.2 us  
IRNUC 1H  
CTEMP 22.0 c  
SLVNT CDCL3  
EXREF 0.00 ppm  
BF 0.12 Hz  
RGAIN 21

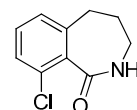

2c-regio isomer

F:\Takada\carbon\42YYT1-87-24.ais

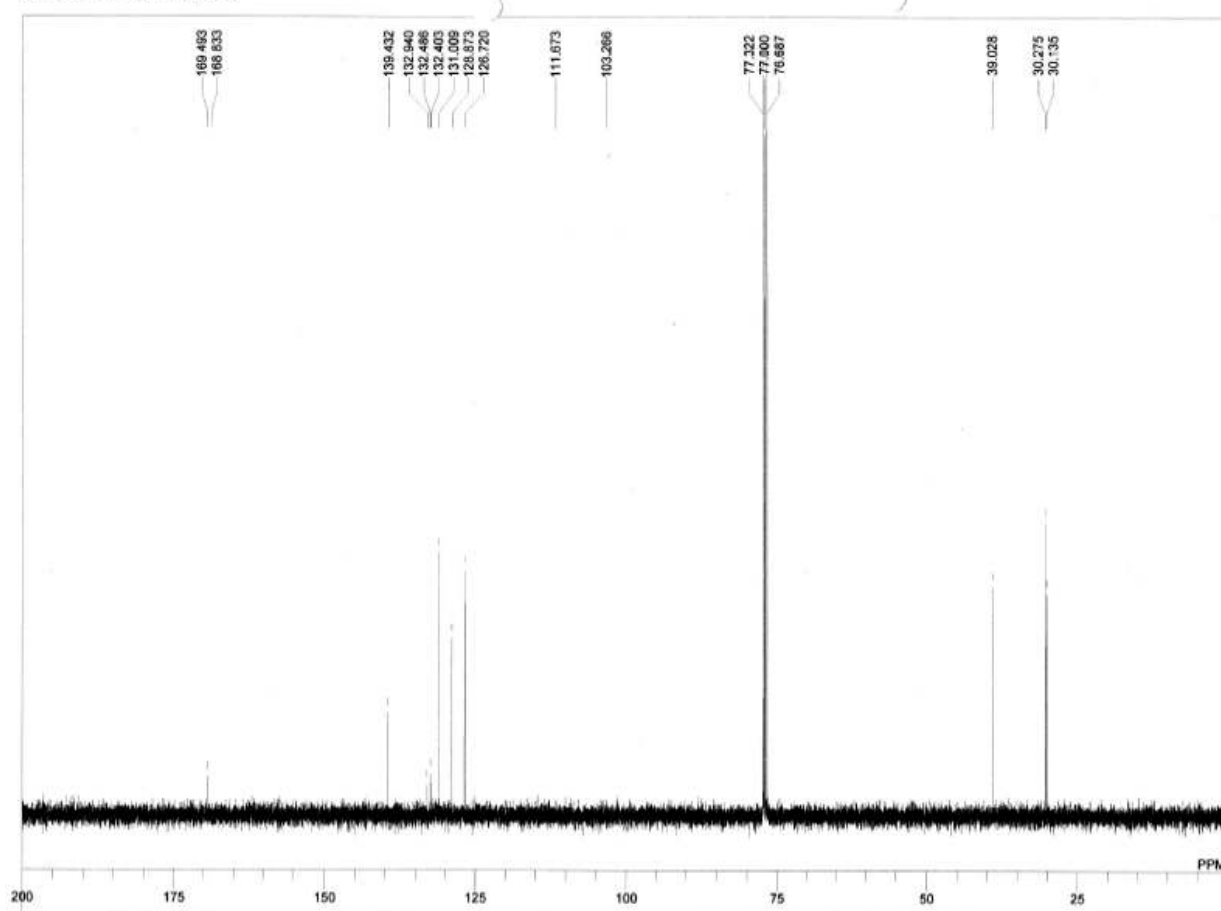

DFILE F:\Takada\carbon\42YYT1-87-24.ais  
COMNT 42YYT1-87-24  
DATIM Fri Aug 27 02:44:1  
OBNUC 13C  
EXMOD BCM  
OBFRQ 100.40 MHz  
OBSET 125.00 KHz  
OBFIN 10500.0 Hz  
POINT 32768  
FREQU 27173.9 Hz  
SCANS 256  
ACQTM 1.206 sec  
PD 1.794 sec  
PW1 4.6 us  
IRNUC 1H  
CTEMP 25.5 c  
SLVNT CDCL3  
EXREF 77.00 ppm  
BF 0.12 Hz  
RGAIN 25

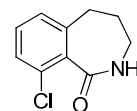

2c-regio isomer

F:\Wada\42PNW-2-187-35.als

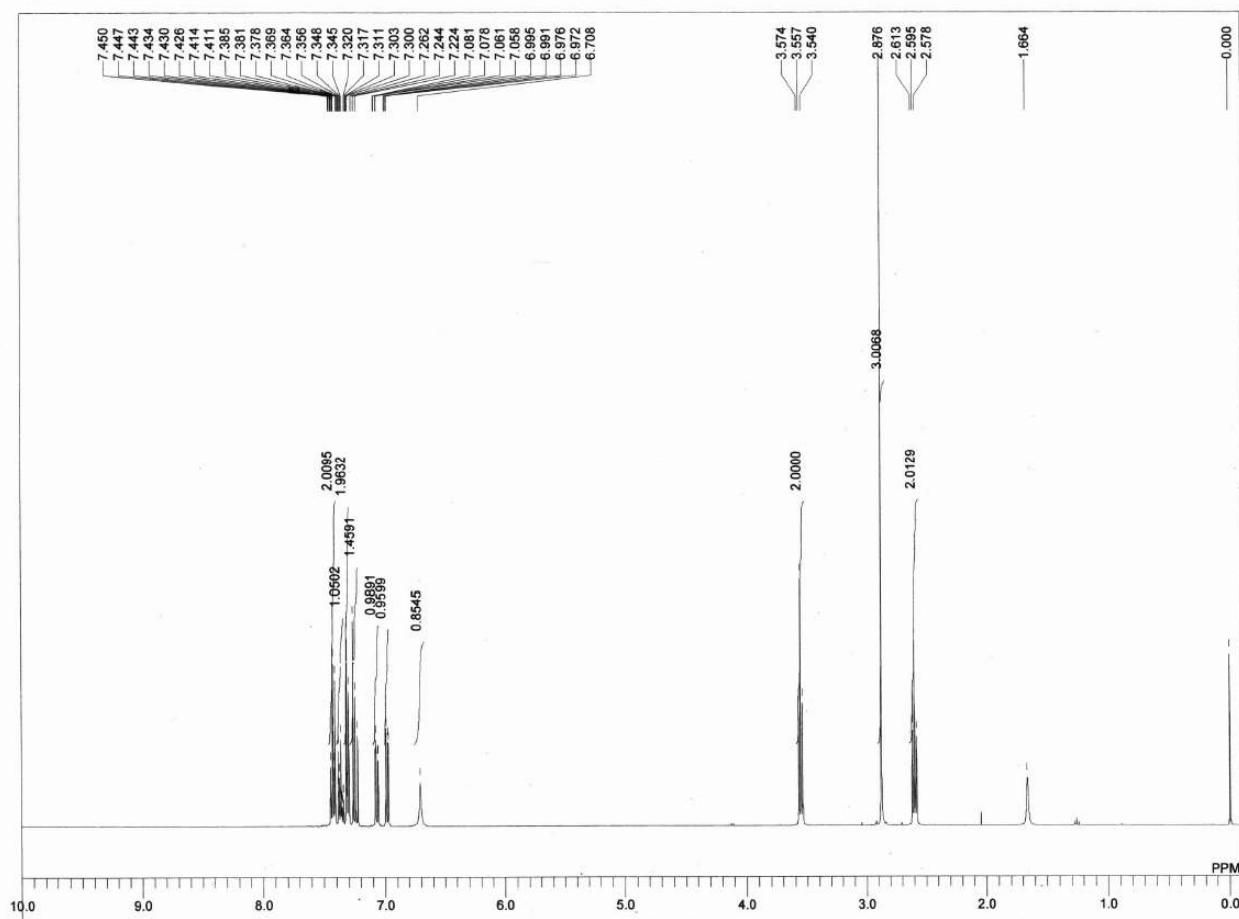

DFILE F:\Wada\42PNW-2  
 COMNT Wed Nov 11 19:23  
 DATIM 1H  
 OBNUC NON  
 EXMOD 399.65 MHz  
 OBFRQ 124.00 KHz  
 OBSET 10500.0 Hz  
 OBFIN 32768  
 POINT 8000.0 Hz  
 FREQU 16  
 SCANS 4.096 sec  
 ACQTM 2.904 sec  
 PD 6.2 us  
 PW1 1H  
 IRNUC 21.9 c  
 CTEMP CDCL3  
 SLVNT 0.00 ppm  
 EXREF 0.12 Hz  
 BF 18  
 RGAIN

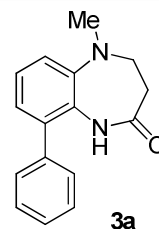

F:\Wada\42PNW-2-187-35-carbon.als

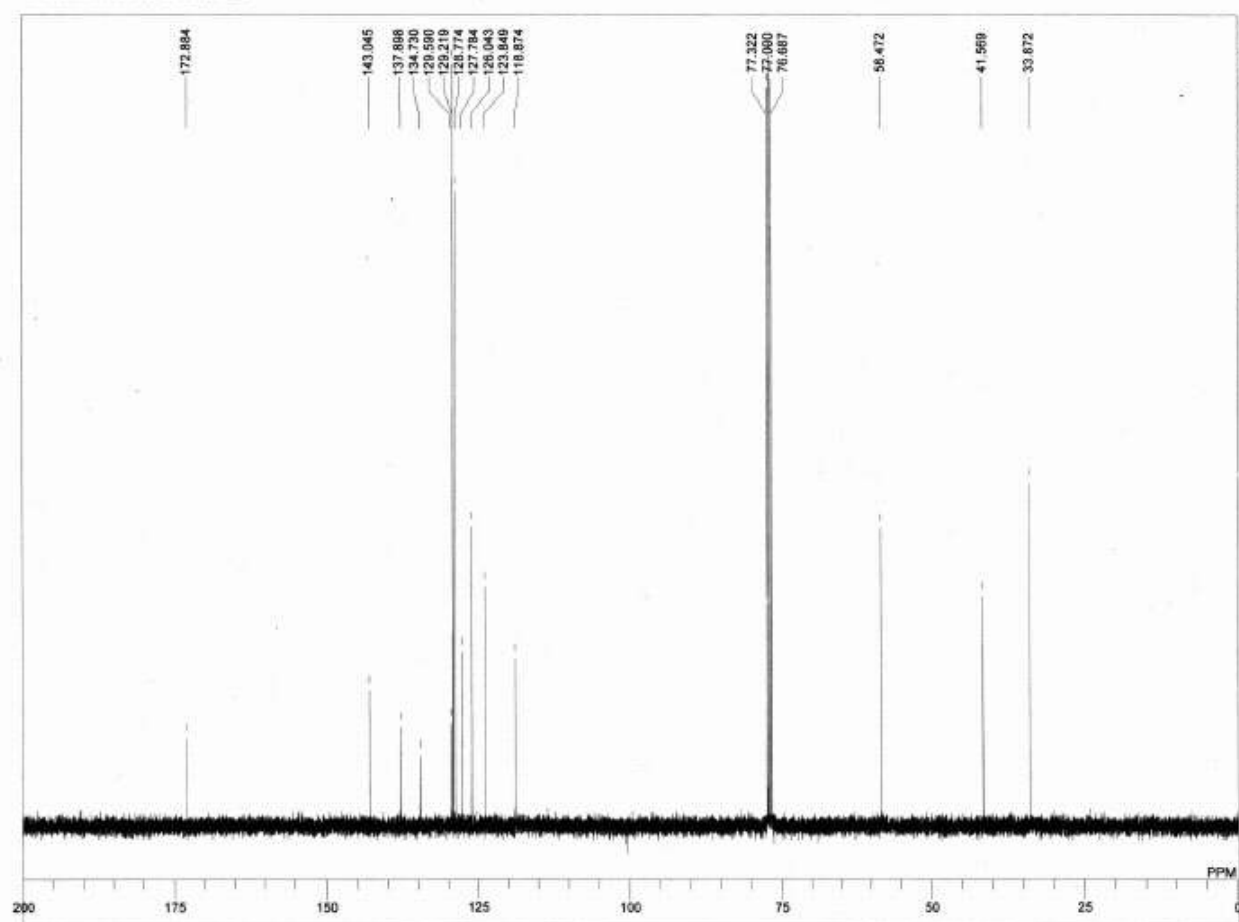

DFILE F:\Wada\42PNW-2  
 COMNT Wed Nov 11 19:49  
 DATIM 13C  
 OBNUC BCM  
 EXMOD 100.40 MHz  
 OBFRQ 125.00 KHz  
 OBSET 10500.0 Hz  
 OBFIN 32768  
 POINT 27173.9 Hz  
 FREQU 512  
 SCANS 1.206 sec  
 ACQTM 1.794 sec  
 PD 4.6 us  
 PW1 1H  
 IRNUC 22.6 c  
 CTEMP CDCL3  
 SLVNT 77.00 ppm  
 EXREF 0.12 Hz  
 BF 24  
 RGAIN

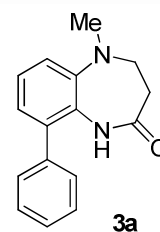

F:\Takada\42Y-YT1-86-34.als

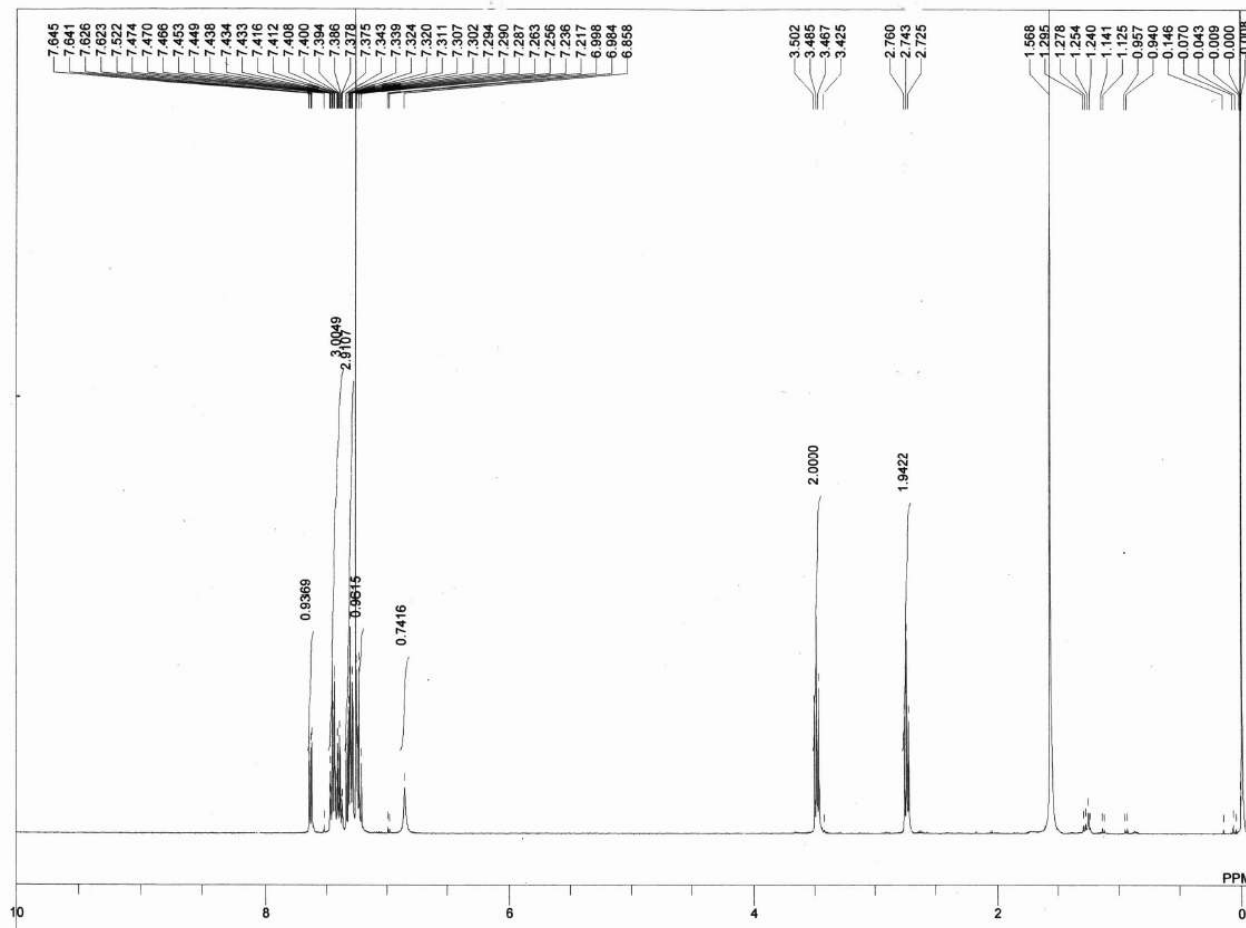

DFILE F:\Takada\42Y-Y  
 COMNT  
 DATIM Fri Aug 28 22:01:  
 1H  
 OBNUC  
 EXMOD NON  
 OBFREQ 399.65 MHz  
 OBSET 124.00 KHz  
 OBFIN 10500.0 Hz  
 POINT 32768  
 FREQU 8000.0 Hz  
 SCANS 64  
 ACQTM 4.096 sec  
 PD 2.904 sec  
 PW1 6.2 us  
 IRNUC 1H  
 CTEMP 22.5 c  
 SLVNT CDCL3  
 EXREF 0.00 ppm  
 BF 0.12 Hz  
 RGAIN 25

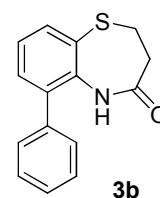

F:\Tabata\42JNW3-23-34C.als

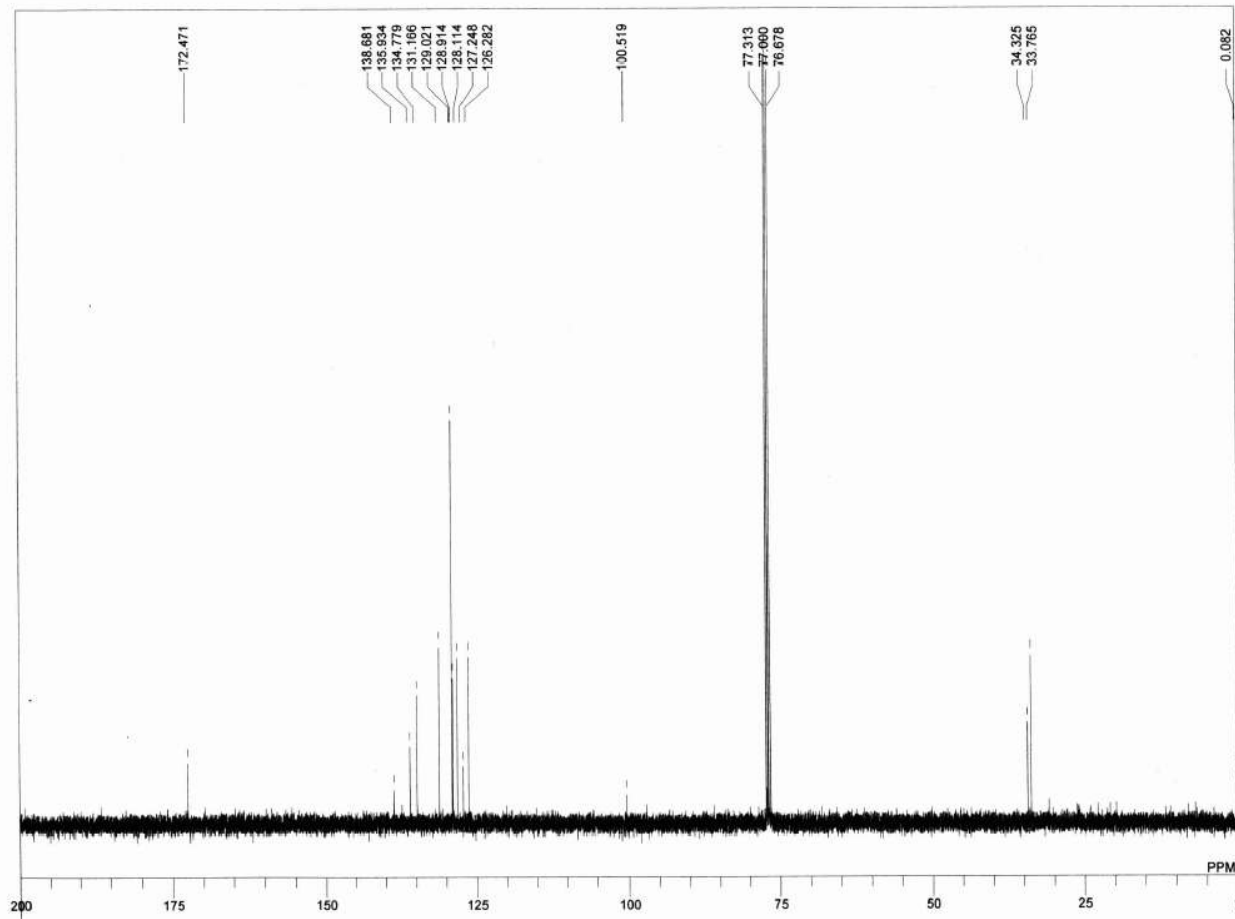

DFILE F:\Tabata\42JN  
 COMNT  
 DATIM Tue Jan 18 16:00:1  
 13C  
 OBNUC  
 EXMOD BCM  
 OBFREQ 100.40 MHz  
 OBSET 125.00 KHz  
 OBFIN 10500.0 Hz  
 POINT 32768  
 FREQU 27173.9 Hz  
 SCANS 512  
 ACQTM 1.206 sec  
 PD 1.794 sec  
 PW1 4.6 us  
 IRNUC 13C  
 CTEMP 23.8 c  
 SLVNT CDCL3  
 EXREF 77.00 ppm  
 BF 0.12 Hz  
 RGAIN 24

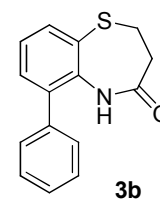

F:\Tabata\Hta8\42JHTA8-15-40.als

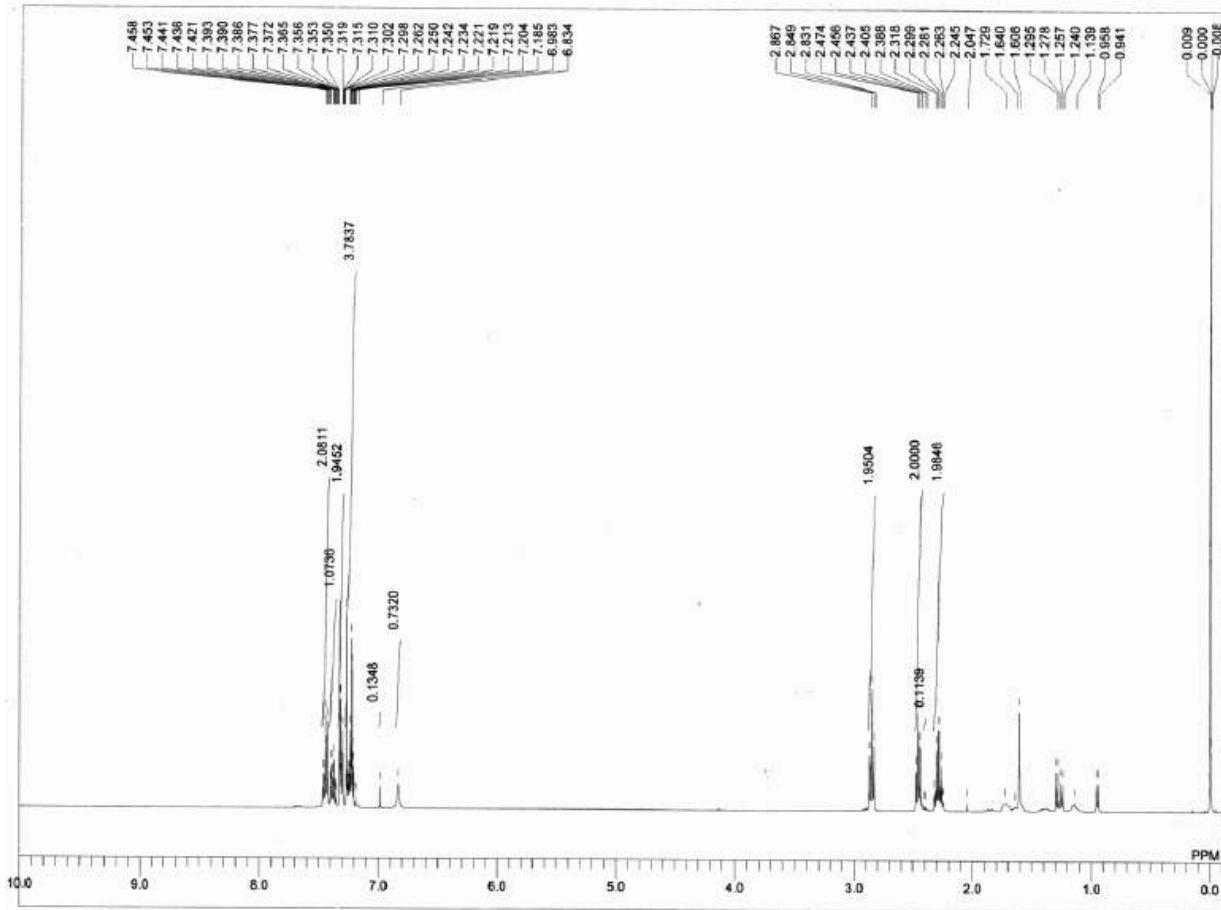

DFILE F:\Tabata\Hta8\42J  
 COMNT  
 DATIM Fri Nov 06 04:16:11  
 OBNUC 1H  
 EXMOD NDN  
 OBFRO 399.65 MHz  
 OBSET 124.00 KHz  
 OBFIN 10500.0 Hz  
 POINT 32768  
 FREQU 8000.0 Hz  
 SCANS 32  
 ACQTM 4.096 sec  
 PD 2.904 sec  
 PW1 6.2 us  
 IRNUC 1H  
 CTEMP 22.7 c  
 SLVNT CDCL3  
 EXREF 0.00 ppm  
 BF 0.12 Hz  
 RGAIN 19

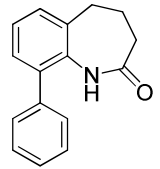

3c

F:\42JNW3-26-47C.als

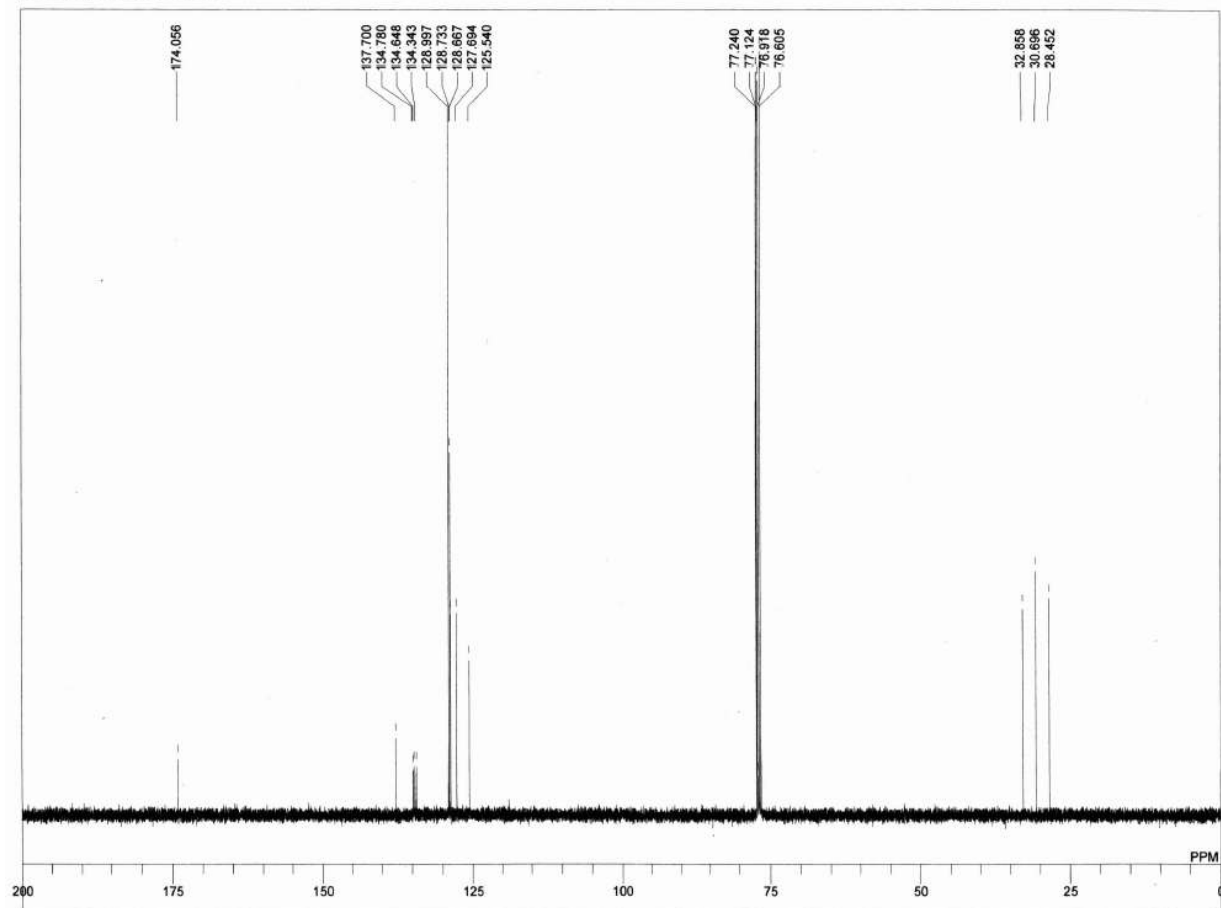

DFILE F:\Tabata\42JNW3-26-47C.als  
 COMNT  
 DATIM Tue Mar 08 12:43:  
 OBNUC 13C  
 EXMOD BCM  
 OBFRO 100.40 MHz  
 OBSET 125.00 KHz  
 OBFIN 10500.0 Hz  
 POINT 32768  
 FREQU 27173.9 Hz  
 SCANS 1024  
 ACQTM 1.206 sec  
 PD 1.794 sec  
 PW1 4.6 us  
 IRNUC 1H  
 CTEMP 24.6 c  
 SLVNT CDCL3  
 EXREF 0.00 ppm  
 BF 0.12 Hz  
 RGAIN 24

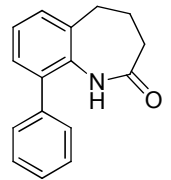

3c

G:\Wada\42PNW1-54-26.als

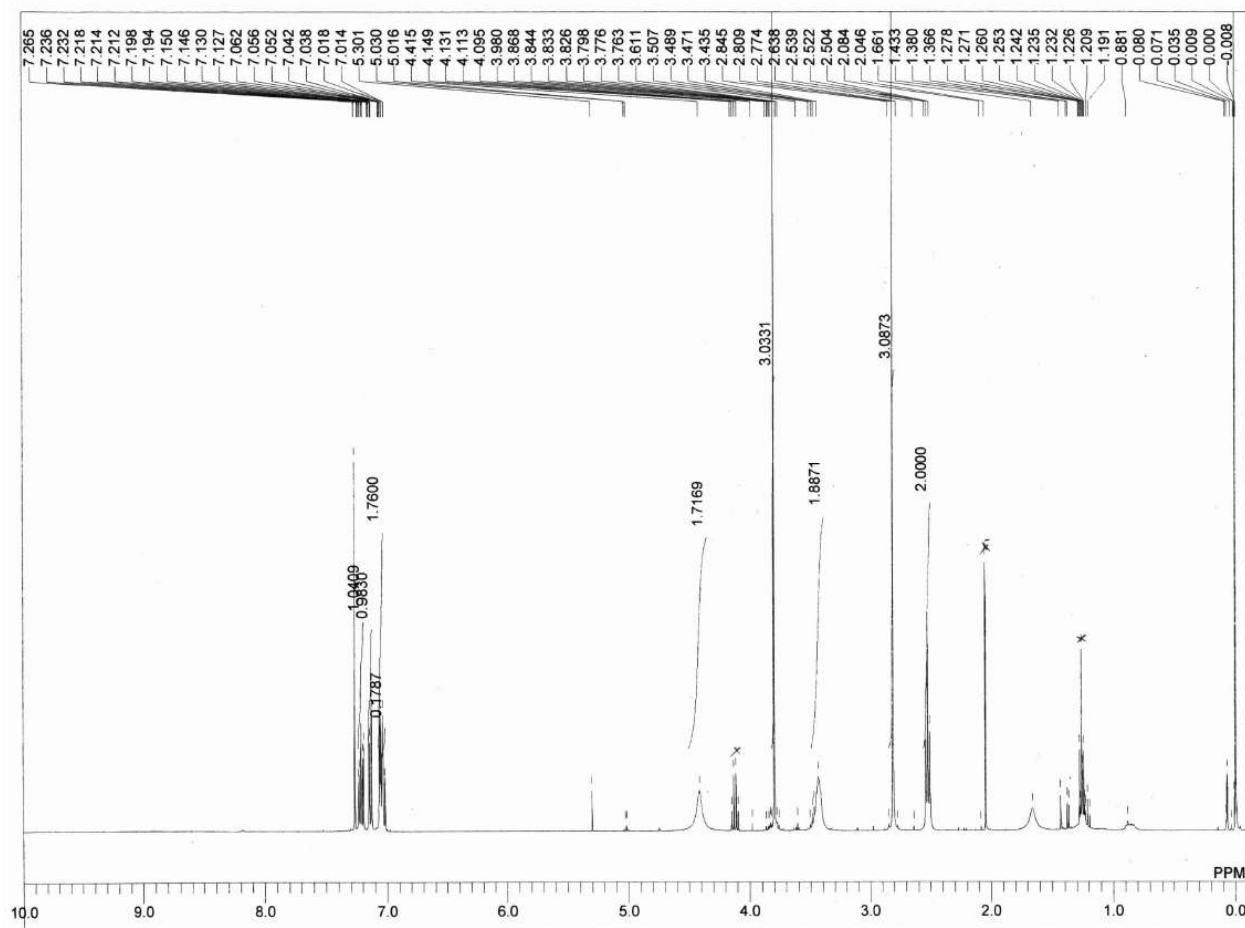

DFILE G:\Wada\42PN  
COMNT Tue Jun 10 18:  
DATIM 1H  
OBNUC NON  
EXMOD 399.65 MHz  
OBFRQ 124.00 KHz  
OBSET 10500.0 Hz  
OBFIN 32768  
POINT 8000.0 Hz  
FREQU 16  
SCANS 4.096 sec  
ACQTM 2.904 sec  
PD 6.2 us  
PW1 1H  
IRNUC 24.3 c  
CTEMP CDCL3  
SLVNT 0.00 ppm  
EXREF 0.12 Hz  
BF F

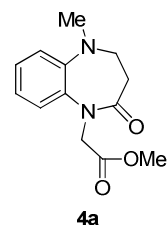

F:\Wada\42PNW3-18-30-carbon.als

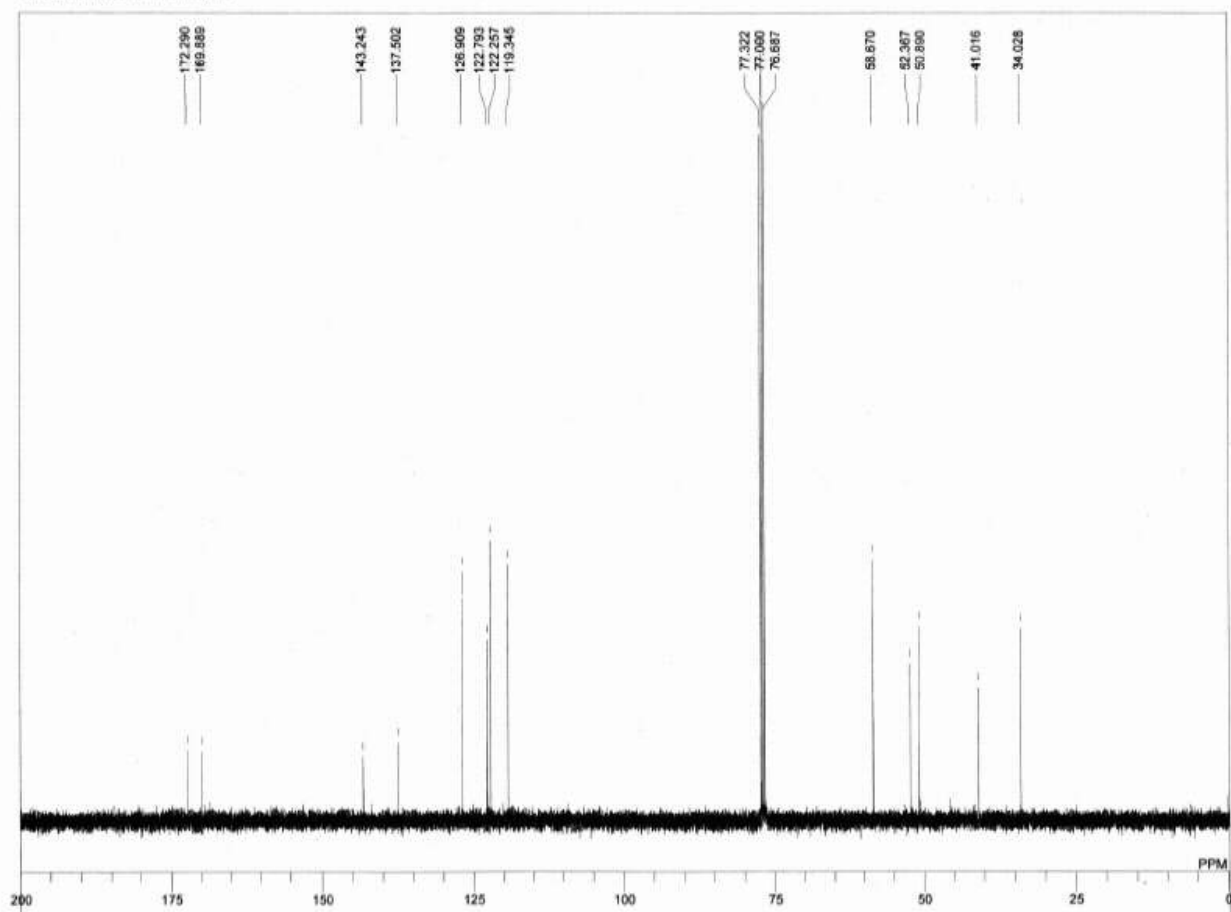

DFILE F:\Wada\42PNW3-  
COMNT Fri Nov 06 05:30:31  
DATIM 13C  
OBNUC BCM  
EXMOD 100.40 MHz  
OBFRQ 125.00 KHz  
OBSET 10500.0 Hz  
OBFIN 32768  
POINT 27173.9 Hz  
FREQU 512  
SCANS 1.206 sec  
ACQTM 1.794 sec  
PD 4.6 us  
PW1 1H  
IRNUC 23.8 c  
CTEMP CDCL3  
SLVNT 77.00 ppm  
EXREF 0.12 Hz  
BF 25  
RGAIN

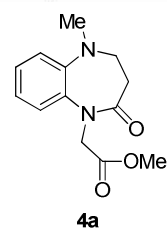



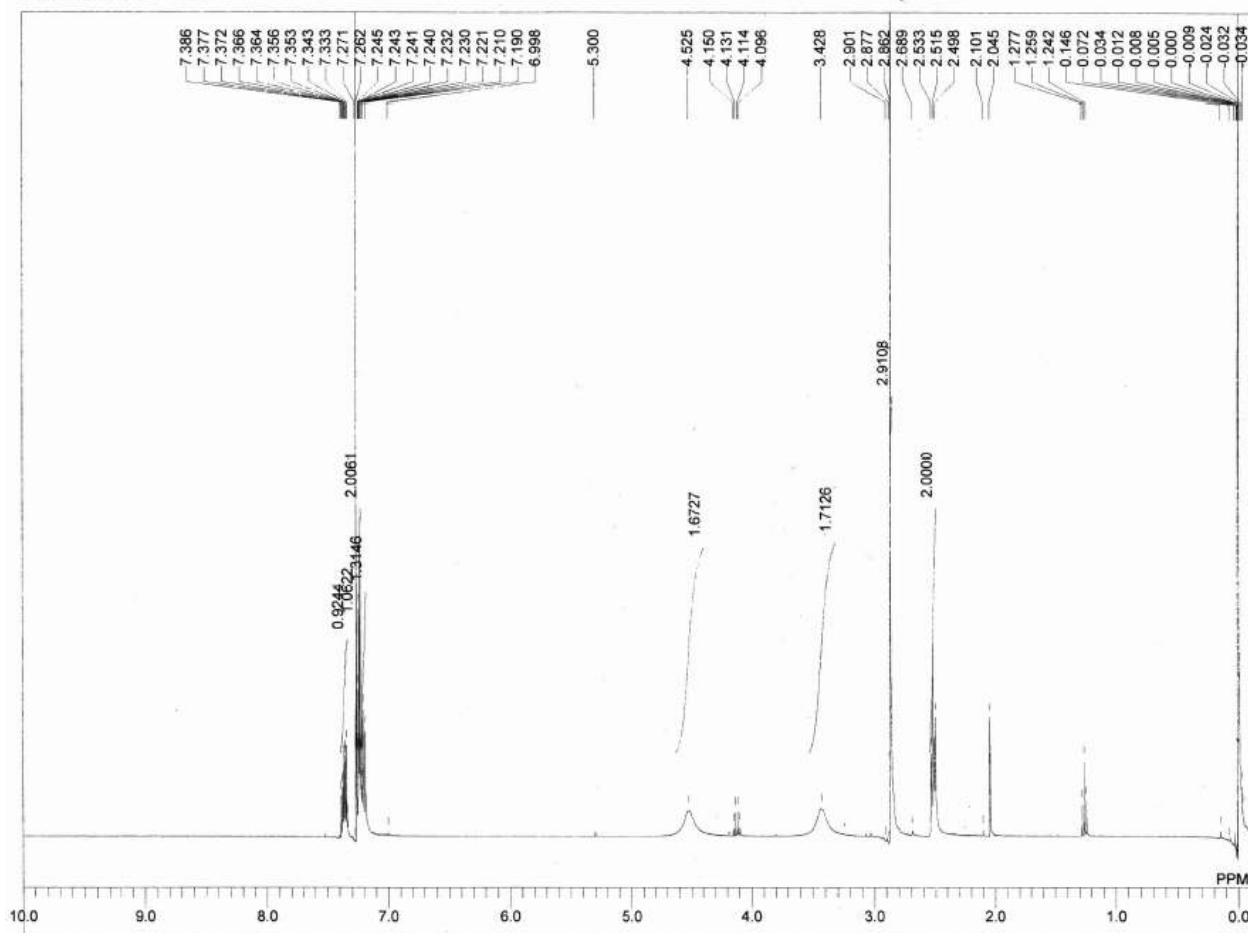

|       |               |
|-------|---------------|
| DFILE | G:\Wada42P    |
| COMNT |               |
| DATIM | Tue Jun 17 05 |
| OBNUC | 1H            |
| EXMOD | NON           |
| OBFRQ | 399.65 MHz    |
| OBSET | 124.00 KHz    |
| OBFIN | 10500.0 Hz    |
| POINT | 32768         |
| FREQU | 8000.0 Hz     |
| SCANG | 16            |
| ACQTM | 4.096 sec     |
| PD    | 2.904 sec     |
| PW1   | 6.2 us        |
| IRNUC | 1H            |
| CTEMP | 26.3 c        |
| SLVNT | CDCL3         |
| EXREF | 0.00 ppm      |
| BF    | 0.12 Hz       |
| RGAIN | 20            |

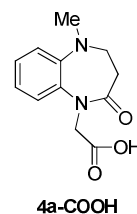

F:\Wada\42PNW1-60-25-carbon.xls

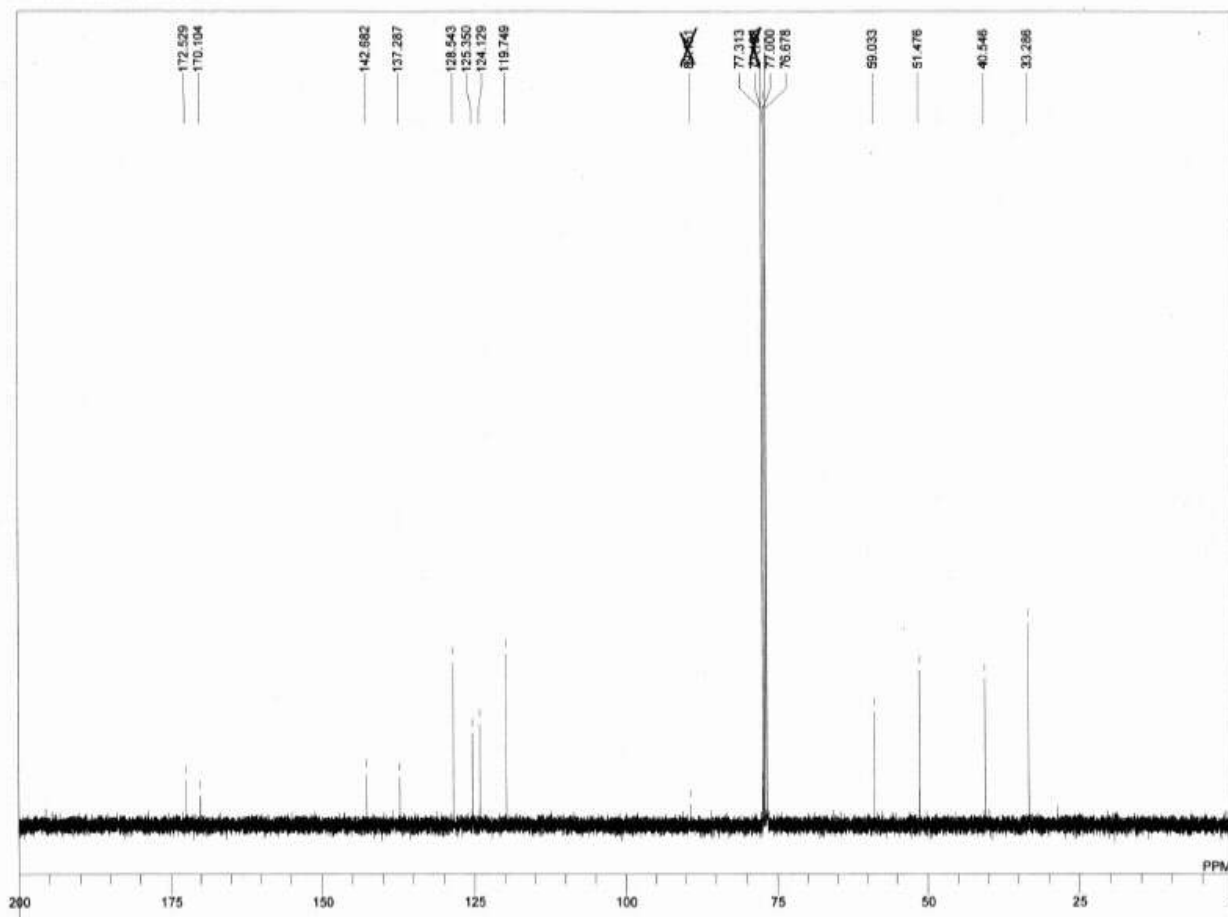

```

DFILE      F:\Wada42PNW1-
COMNT
DATIM      Sat Oct 31 13:21:5
OBNUC      13C
EXMOD      BCM
OBFRQ      100.40 MHz
OBSET      125.00 KHz
OBFIN      10500.0 Hz
POINT
FREQU      27173.9 Hz
SCANS      512
AQOTM      1.266 sec
PD          1.794 sec
PW1         4.6 us
IRNUC      1H
CTEMP      22.6 c
SLVNT      CDCL3
EXREF      77.00 ppm
BF          0.12 Hz
RGAIN      24

```

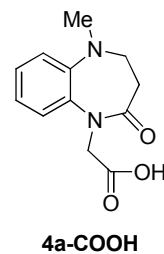

H:\Takada\Sw-42AYT1-40-29.als  
42AYT1-40-29

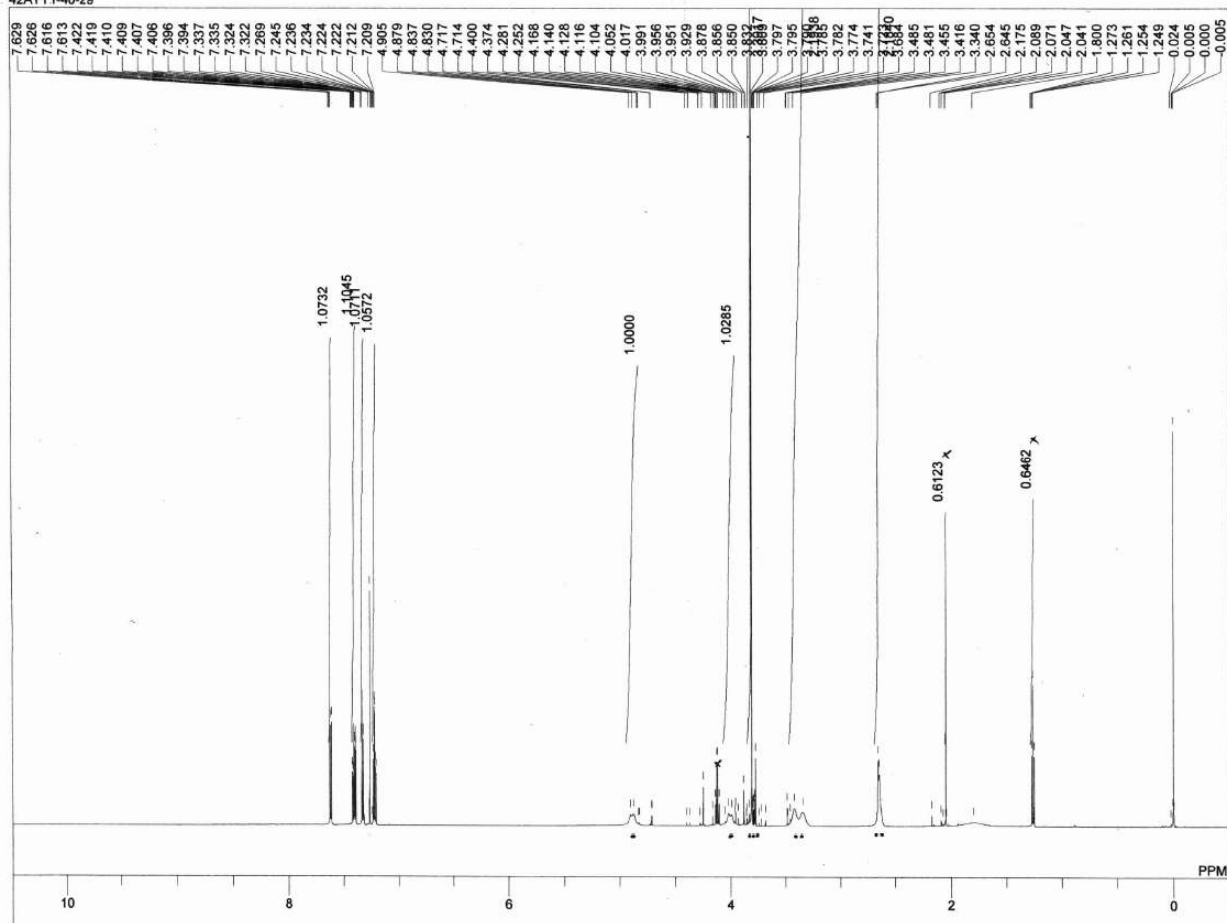

DFILE H:\Takada\Sw-42  
COMNT 42AYT1-40-29  
DATIM 22-NOV-2007 11:1  
OBNUC 1H  
EXMOD single\_pulse.exp  
OBFRQ 600.00 MHz  
OBSET 175.00 KHz  
OBFIN 305.5 Hz  
POINT 32768  
FREQU 9009.0 Hz  
SCANS 64  
ACQTM 3.637 sec  
PD 4.000 sec  
PW1 6.2 us  
IRNUC 1H  
CTEMP 22.8 c  
SLVNT CDCL3  
EXREF 0.00 ppm  
BF 0.12 Hz  
RGAIN 19

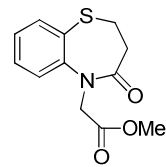

F:\Takada\42Y-YT1-182-35.als

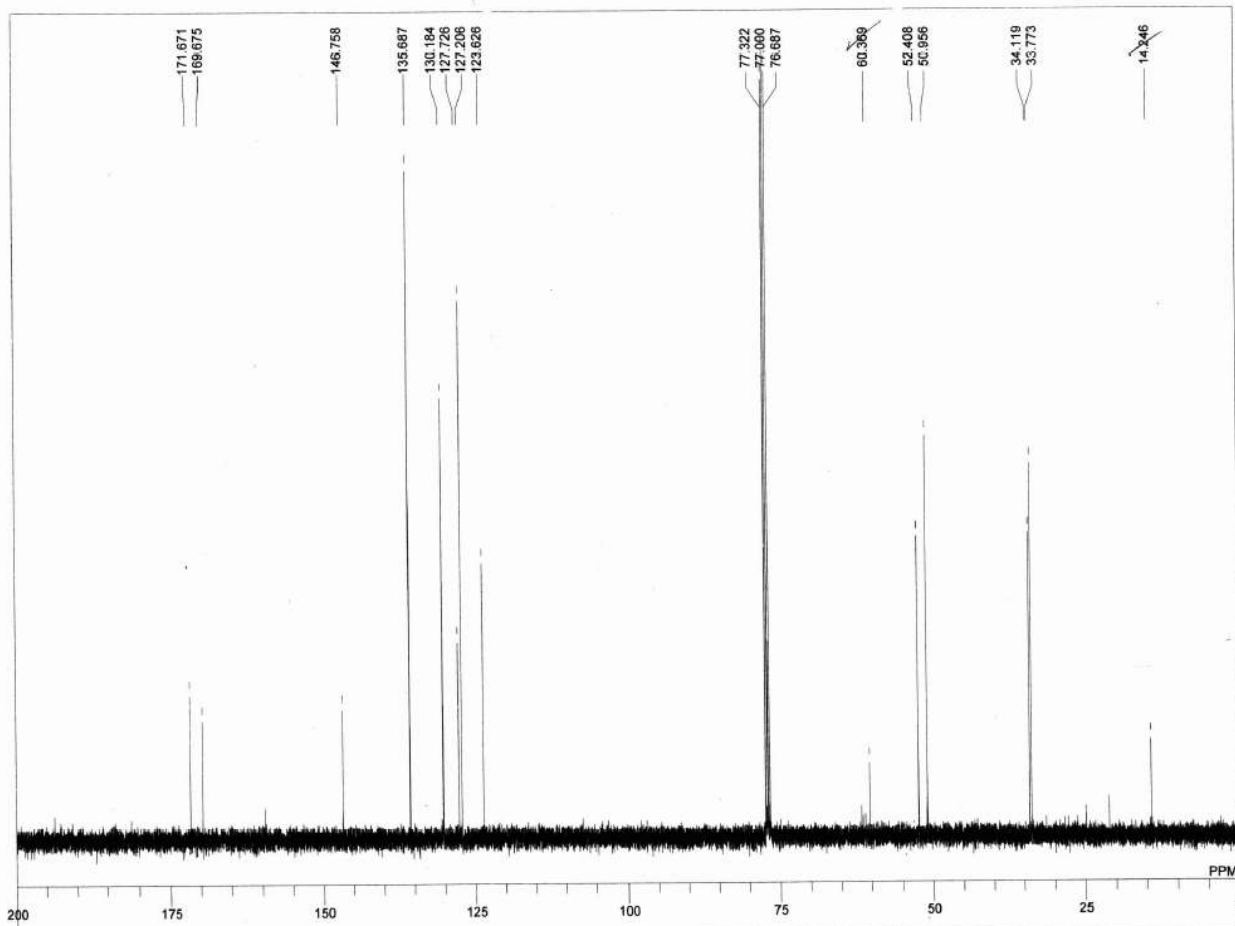

DFILE F:\Takada\42Y-YT  
COMNT Tue Feb 08 06:23:1  
DATIM 13C  
OBNUC BCM  
EXMOD 100.40 MHz  
OBFRQ 125.00 KHz  
OBSET 10500.0 Hz  
OBFIN 32768  
POINT 27173.9 Hz  
FREQU 512  
SCANS 1.206 sec  
ACQTM 1.794 sec  
PD 4.6 us  
PW1 1H  
IRNUC 25.2 c  
CTEMP CDCL3  
SLVNT 77.00 ppm  
EXREF 0.12 Hz  
BF 24  
RGAIN

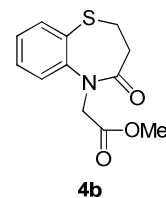

H:\Takada\Sw-142AYT1-42-35.als  
42AYT1-42-35

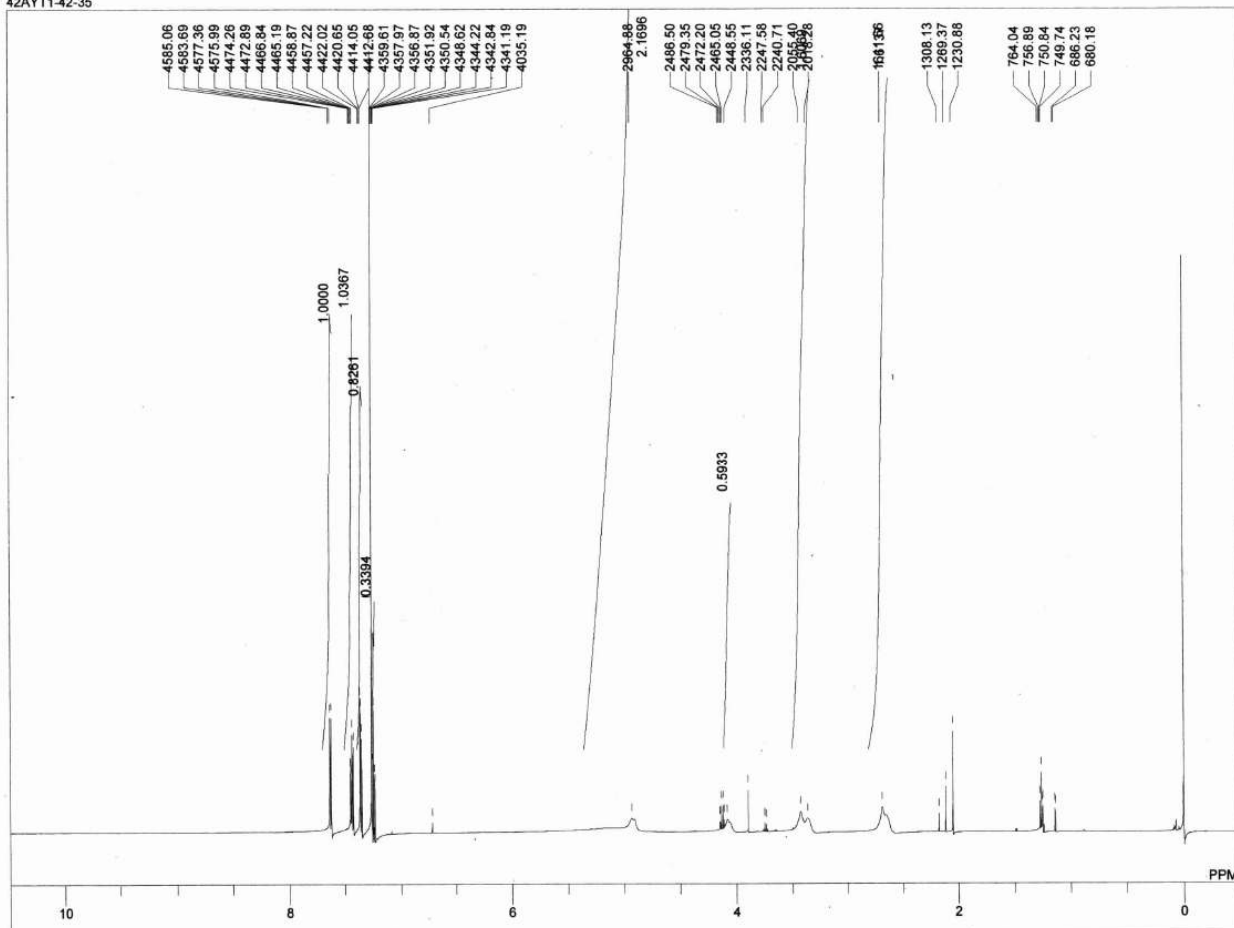

DFILE H:\Takada\Sw-14  
COMNT 42AYT1-42-35  
DATIM 26-NOV-2007 09:  
OBNUC 1H  
EXMOD single\_pulse.exp  
OBFRQ 600.00 MHz  
OBSET 175.00 KHz  
OBFIN 305.5 Hz  
POINT 32768  
FREQU 9009.0 Hz  
SCANS 64  
ACQTM 3.637 sec  
PD 4.000 sec  
PW1 6.2 us  
IRNUC 1H  
CTEMP 22.7 c  
SLVNT CDCL3  
EXREF 0.00 ppm  
BF 0.12 Hz  
RGAIN 20

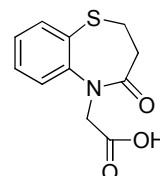

4b-COOH

F:\Takada\carbon\42YYT1-52-20.als

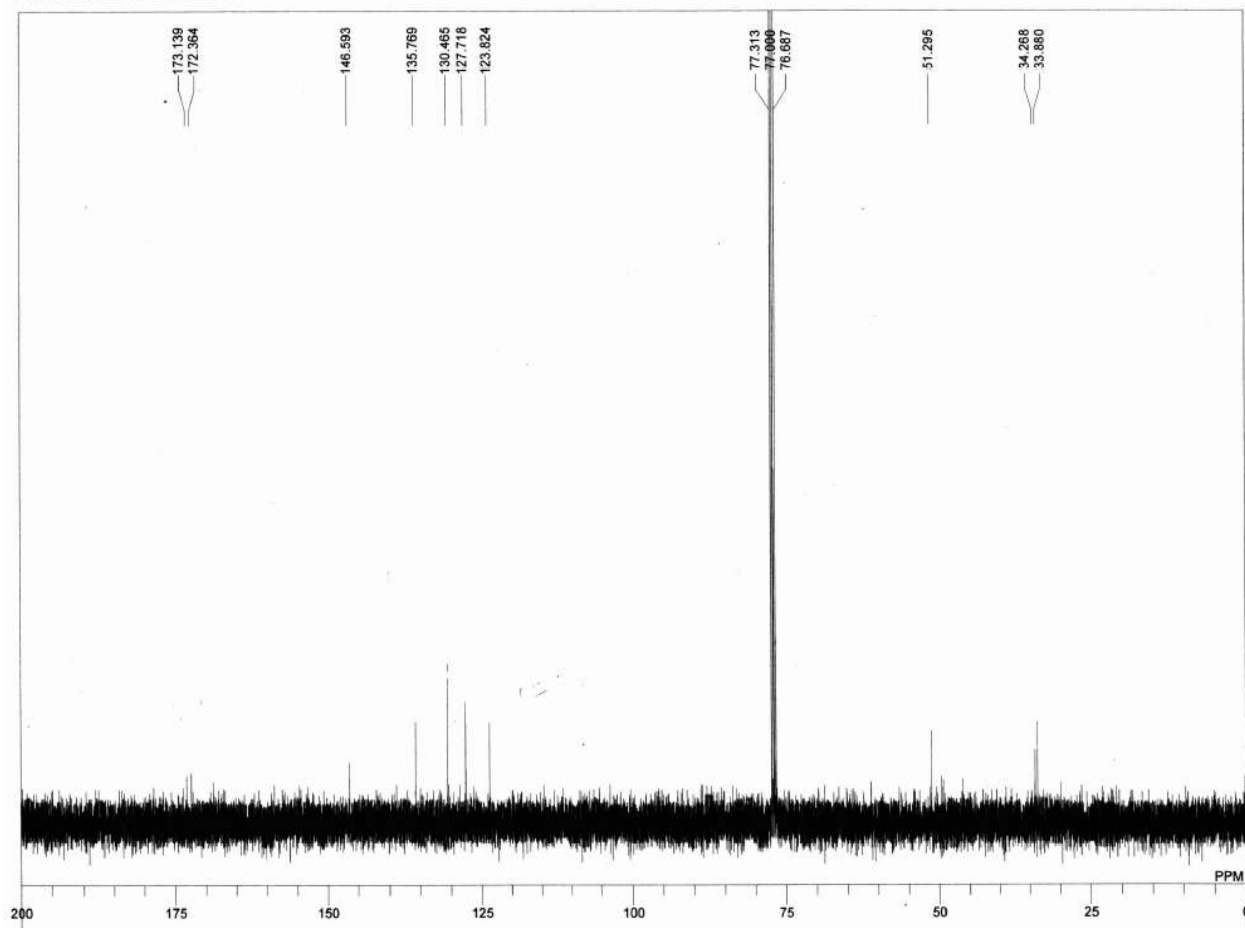

DFILE F:\Takada\carbon\  
COMNT Mon Nov 08 15:27:  
DATIM 13C  
OBNUC BCM  
EXMOD 100.40 MHz  
OBFRQ 125.00 KHz  
OBSET 10500.0 Hz  
OBFIN 32768  
POINT 27173.9 Hz  
FREQU 200  
SCANS 1.206 sec  
ACQTM 1.794 sec  
PD 4.6 us  
PW1 1H  
IRNUC 23.9 c  
CTEMP CDCL3  
SLVNT 77.00 ppm  
EXREF 0.12 Hz  
BF 25  
RGAIN

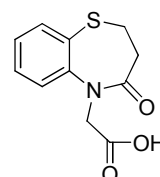

4b-COOH

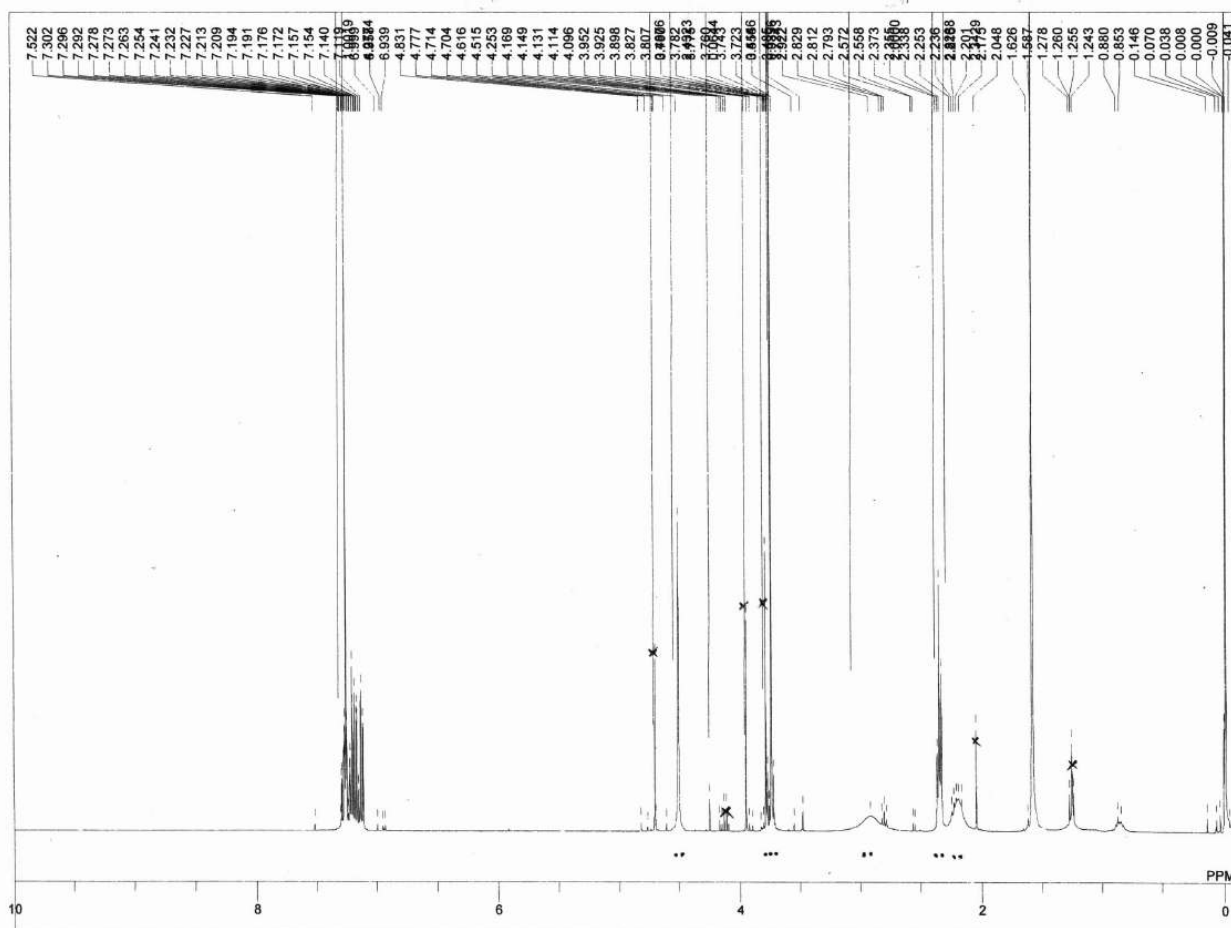

```

DFILE      F:\Takada\42Y-YT-
COMNT
DATIM      Tue Jul 28 13:00:3
OBNUC      1H
EXMOD      NON
OBFRQ      399.65 MHz
OBSET      124.00 KHz
OBFIN      10500.0 Hz
POINT      32768
FREQU      8000.0 Hz
SCANS      128
ACQTM      4.096 sec
PD          2.904 sec
PW1         6.2 us
IRNUC      1H
CTEMP      22.2 c
SLVNT      CDCl3
EXREF      0.00 ppm
BF          0.12 Hz
RGAIN      21

```

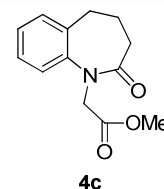

F:\Tabata\Hta9\42JHTA9-106-35C.als

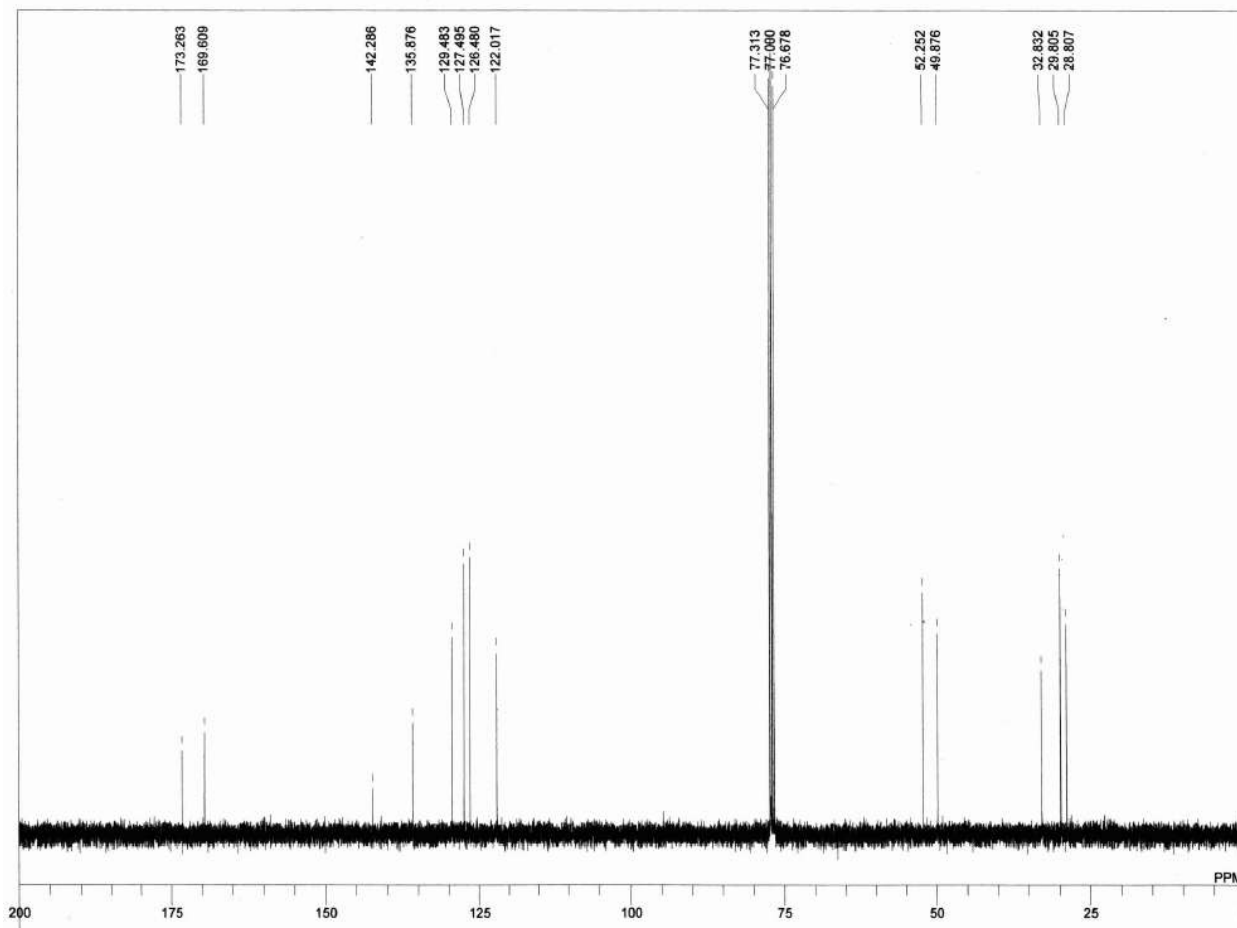

```

DFILE      F:\Tabata\Hta9W42.
COMNT
DATIM      Thu Mar 10 11:22:
OBNUC      13C
EXMOD      BCM
OBFREQ     100.40 MHz
OBSET      125.00 KHz
OBFIN      10500.0 Hz
POINT      32768
FREQU      27173.9 Hz
SCANS      512
ACQTM      1.206 sec
PD         1.794 sec
PW1        4.6 us
IRNUC      1H
CTEMP      24.2 c
SLVNT      CDCL3
EXREF      77.00 ppm
BF         0.12 Hz
RGAIN      24

```

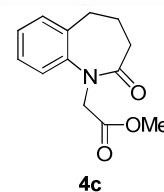

F:\Takada\42Y-YT1-67-20.als

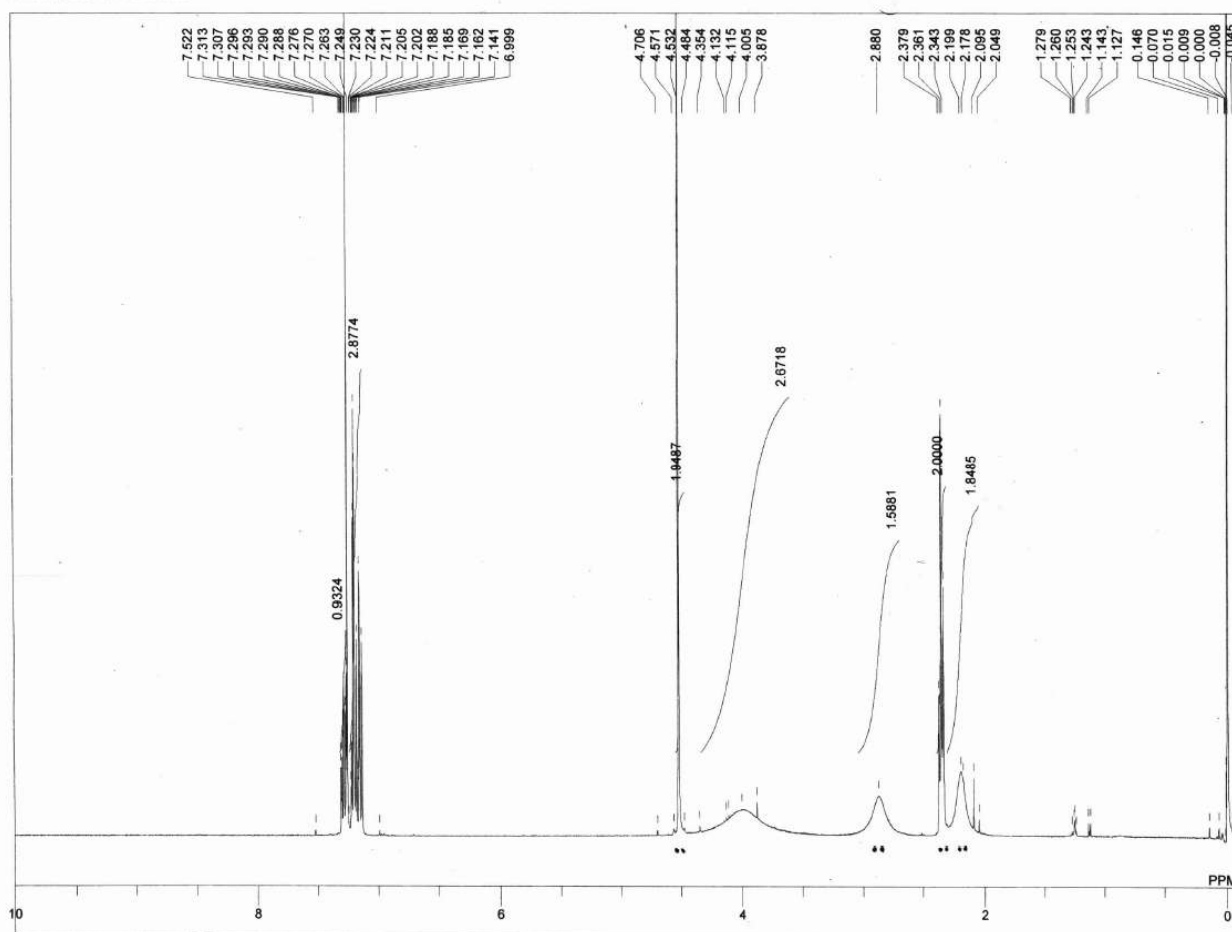

D:\Takada\42Y-YT1-67-20.als  
 Thu Jul 30 14:31:5  
 1H  
 NON  
 399.65 MHz  
 124.00 KHz  
 10500.0 Hz  
 32768  
 8000.0 Hz  
 32  
 4.096 sec  
 2.904 sec  
 6.2 us  
 1H  
 22.6 c  
 CDCL3  
 0.00 ppm  
 0.12 Hz  
 20

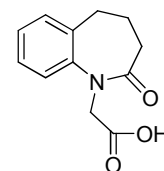

4c-COOH

F:\Takada\carbon\42Y-YT1-67-20.als

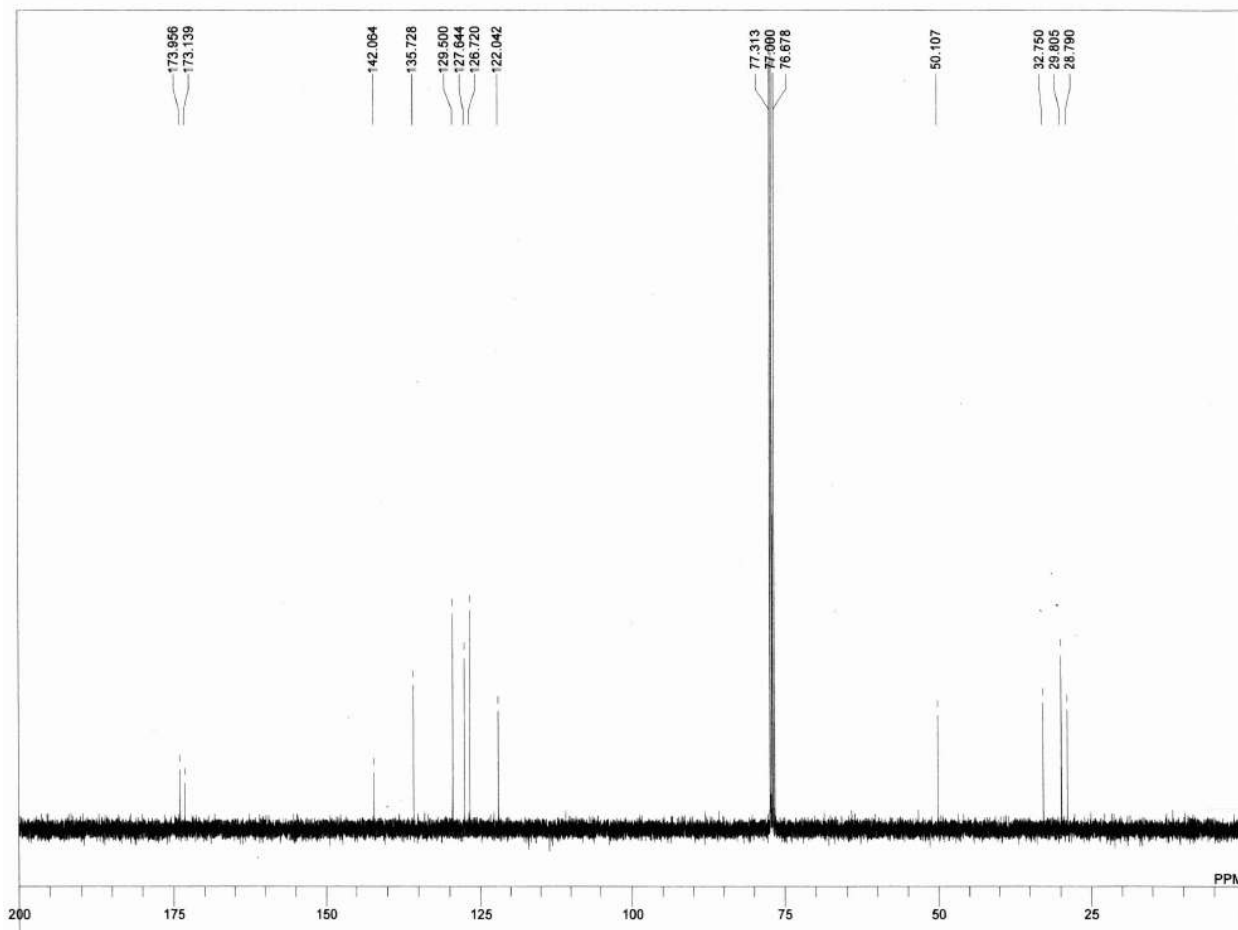

D:\Takada\carbon\42Y-YT1-67-20.als  
 Sat Feb 19 14:05:2  
 13C  
 BCM  
 100.40 MHz  
 125.00 KHz  
 10500.0 Hz  
 32768  
 27173.9 Hz  
 512  
 1.206 sec  
 1.794 sec  
 4.6 us  
 1H  
 25.5 c  
 CDCL3  
 77.00 ppm  
 0.12 Hz  
 24

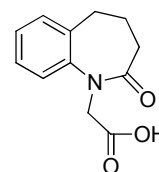

4c-COOH

G:\Wada\42PNW1-138-25.als

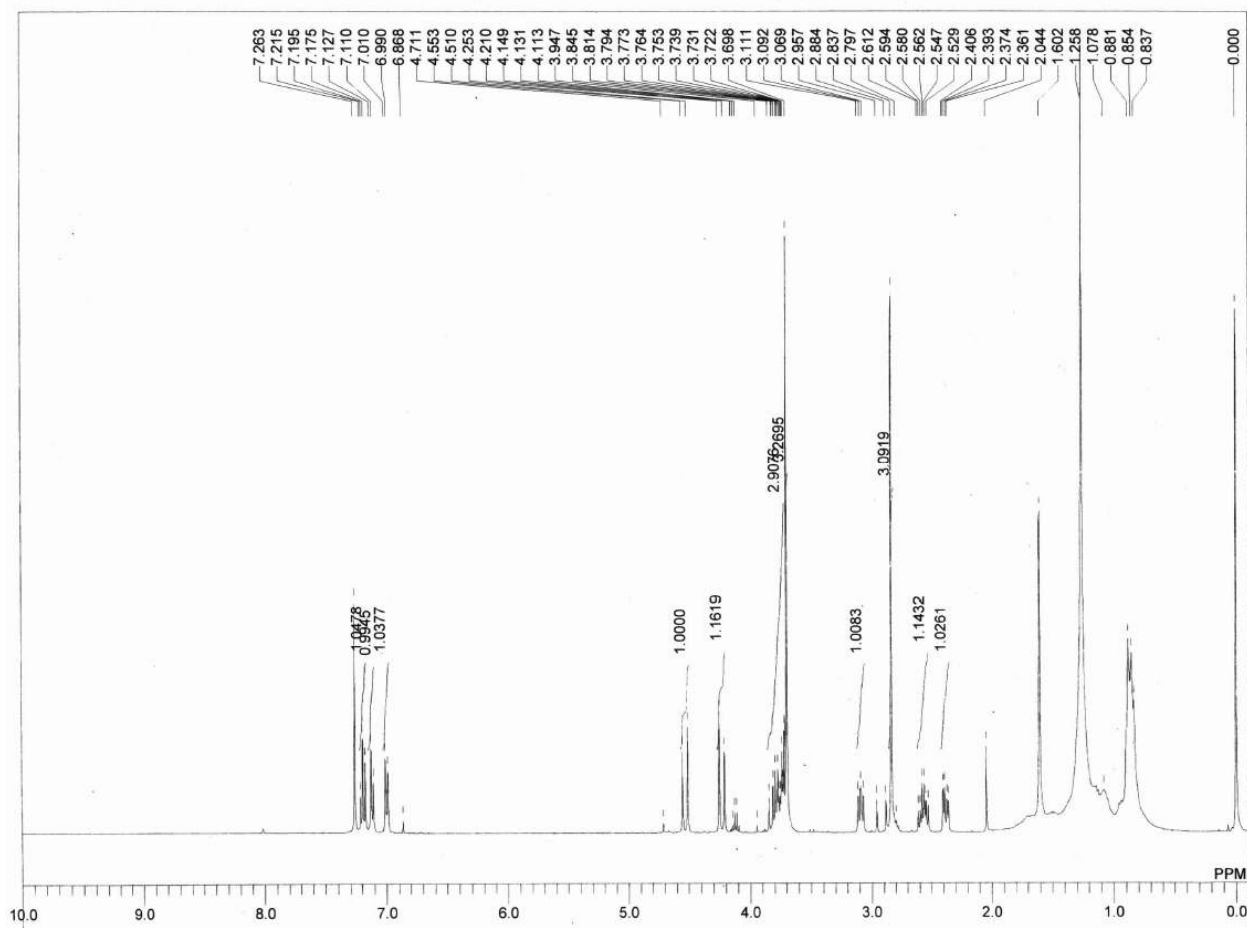

DFILE G:\Wada\42PN  
COMNT Fri Aug 01 17:2  
DATIM 1H  
OBNUC NON  
EXMOD  
OBFRQ 399.65 MHz  
OBSET 124.00 KHz  
OBFIN 10500.0 Hz  
POINT 32768  
FREQU 8000.0 Hz  
SCANS 16  
ACQTM 4.096 sec  
PD 2.904 sec  
PW1 6.2 us  
IRNUC 1H  
CTEMP 26.8 c  
SLVNT CDCL3  
EXREF 0.00 ppm  
BF 1.20 Hz  
RGAIN 16

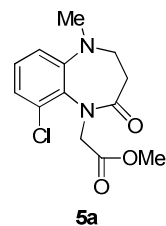

F:\Wada\42PNW-138-25-carbon.als

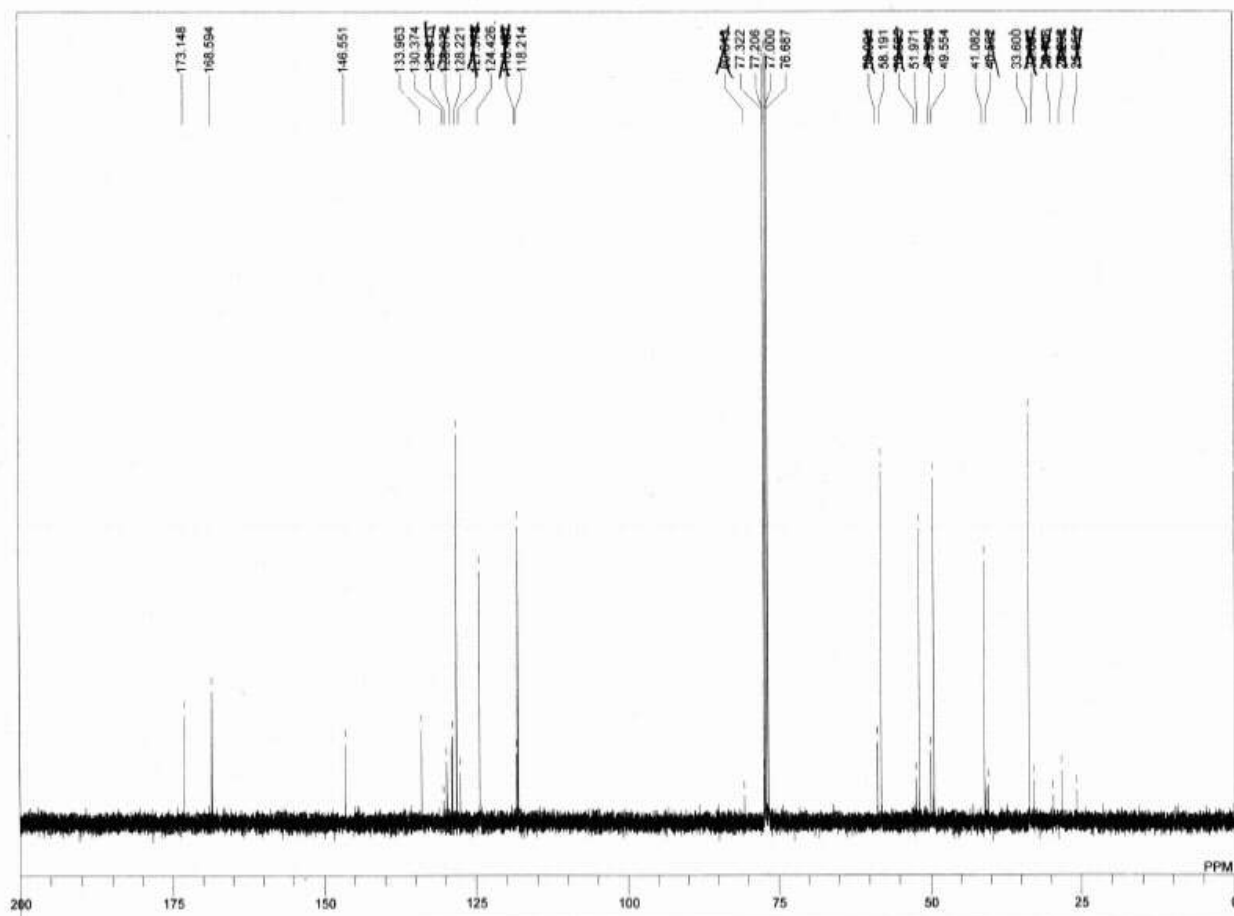

DFILE F:\Wada\42PNW-2  
COMNT Thu Nov 12 14:21:  
DATIM 13C  
OBNUC BCM  
EXMOD  
OBFRQ 100.40 MHz  
OBSET 125.00 KHz  
OBFIN 10500.0 Hz  
POINT 32768  
FREQU 27173.9 Hz  
SCANS 512  
ACQTM 1.206 sec  
PD 1.794 sec  
PW1 4.5 us  
IRNUC 1H  
CTEMP 23.2 c  
SLVNT CDCL3  
EXREF 77.00 ppm  
BF 0.12 Hz  
RGAIN 24

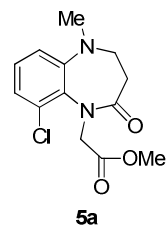

F:\Wada\42PNW-2-122-49.als

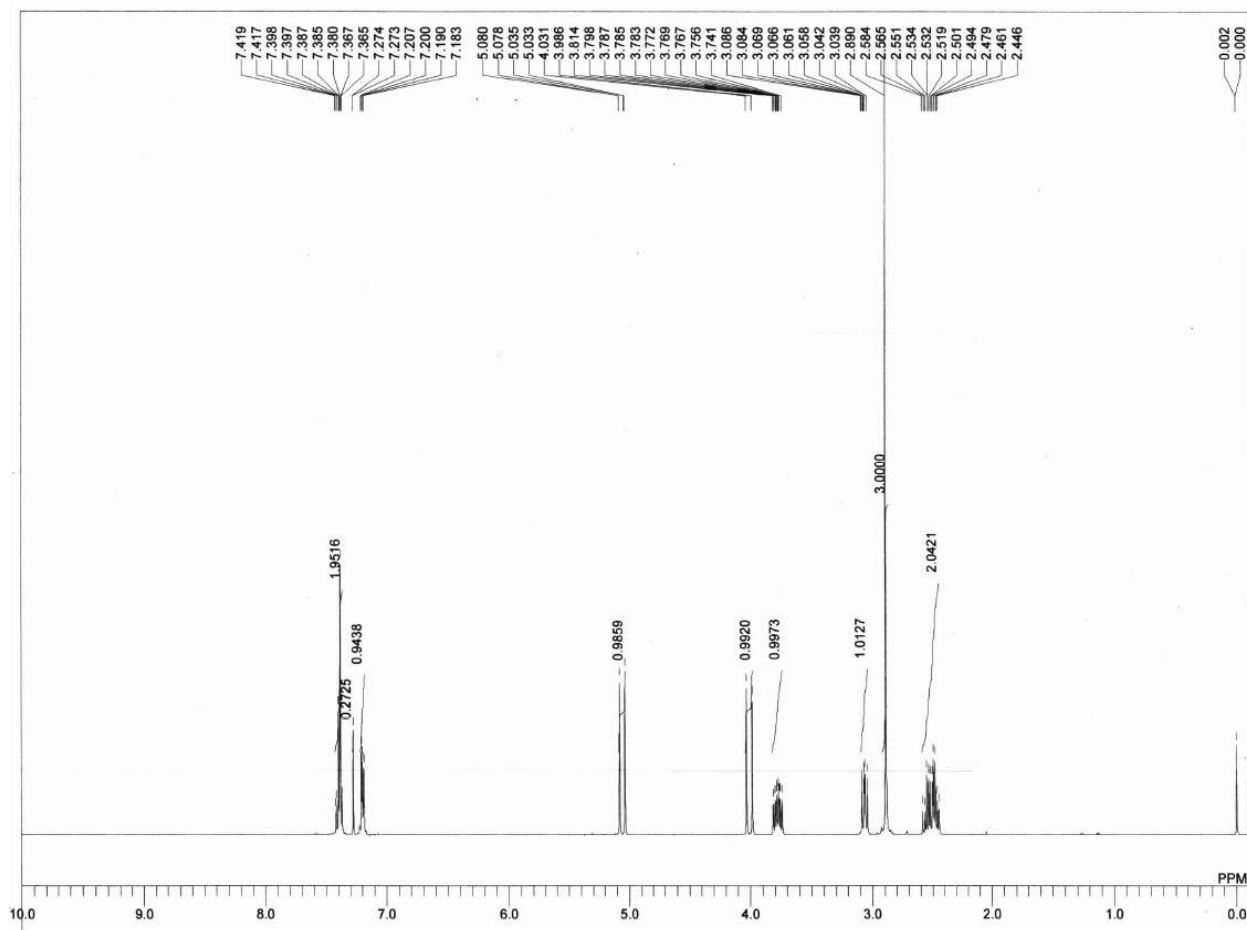

DFILE F:\Wada\42PNW-2  
 COMNT Thu Nov 12 15:08:  
 DATIM 1H  
 OBNUC NON  
 EXMOD 399.65 MHz  
 OBFRQ 124.00 KHz  
 OBSET 10500.0 Hz  
 OBFIN 32768  
 POINT 8000.0 Hz  
 FREQU 16  
 SCANS 4.096 sec  
 ACQTM 2.904 sec  
 PD 6.2 us  
 PW1 1H  
 IRNUC 22.7 c  
 CTEMP CDCL3  
 SLVNT 0.00 ppm  
 EXREF 0.12 Hz  
 BF 16  
 RGAIN

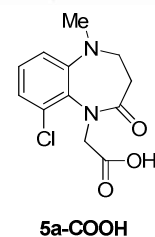

F:\Wada\42PNW-2-122-49-carbon.als

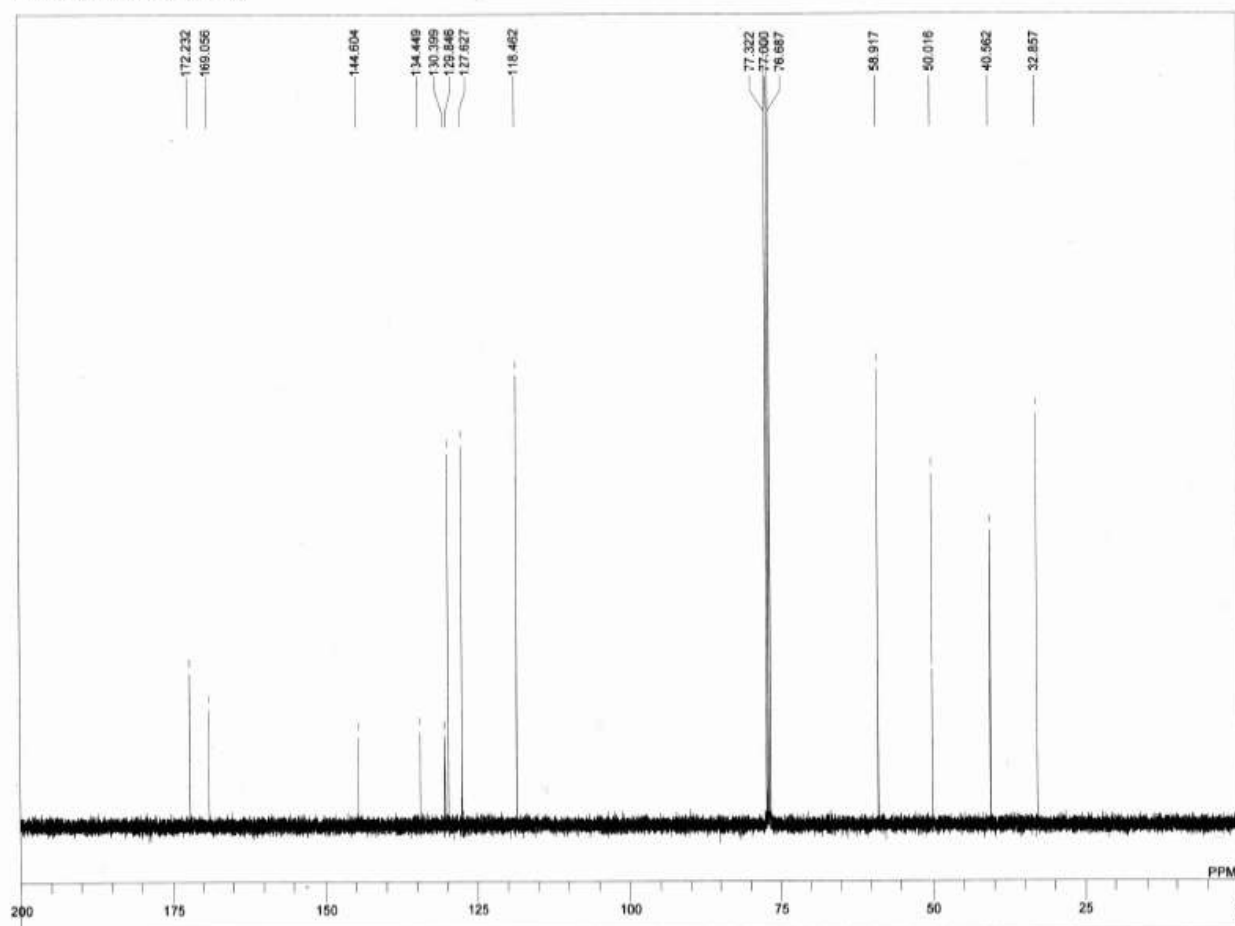

DFILE F:\Wada\42PNW-2  
 COMNT Thu Nov 12 15:34:  
 DATIM 13C  
 OBNUC BCM  
 EXMOD 100.40 MHz  
 OBFRQ 125.00 KHz  
 OBSET 10500.0 Hz  
 OBFIN 32768  
 POINT 27173.9 Hz  
 FREQU 512  
 SCANS 1.206 sec  
 ACQTM 1.794 sec  
 PD 4.6 us  
 PW1 1H  
 IRNUC 23.0 c  
 CTEMP CDCL3  
 SLVNT 77.00 ppm  
 EXREF 0.12 Hz  
 BF 24  
 RGAIN

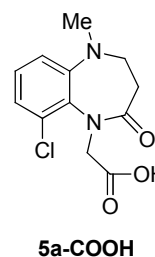

G:\Natsugari\42AHN2-65-25.als

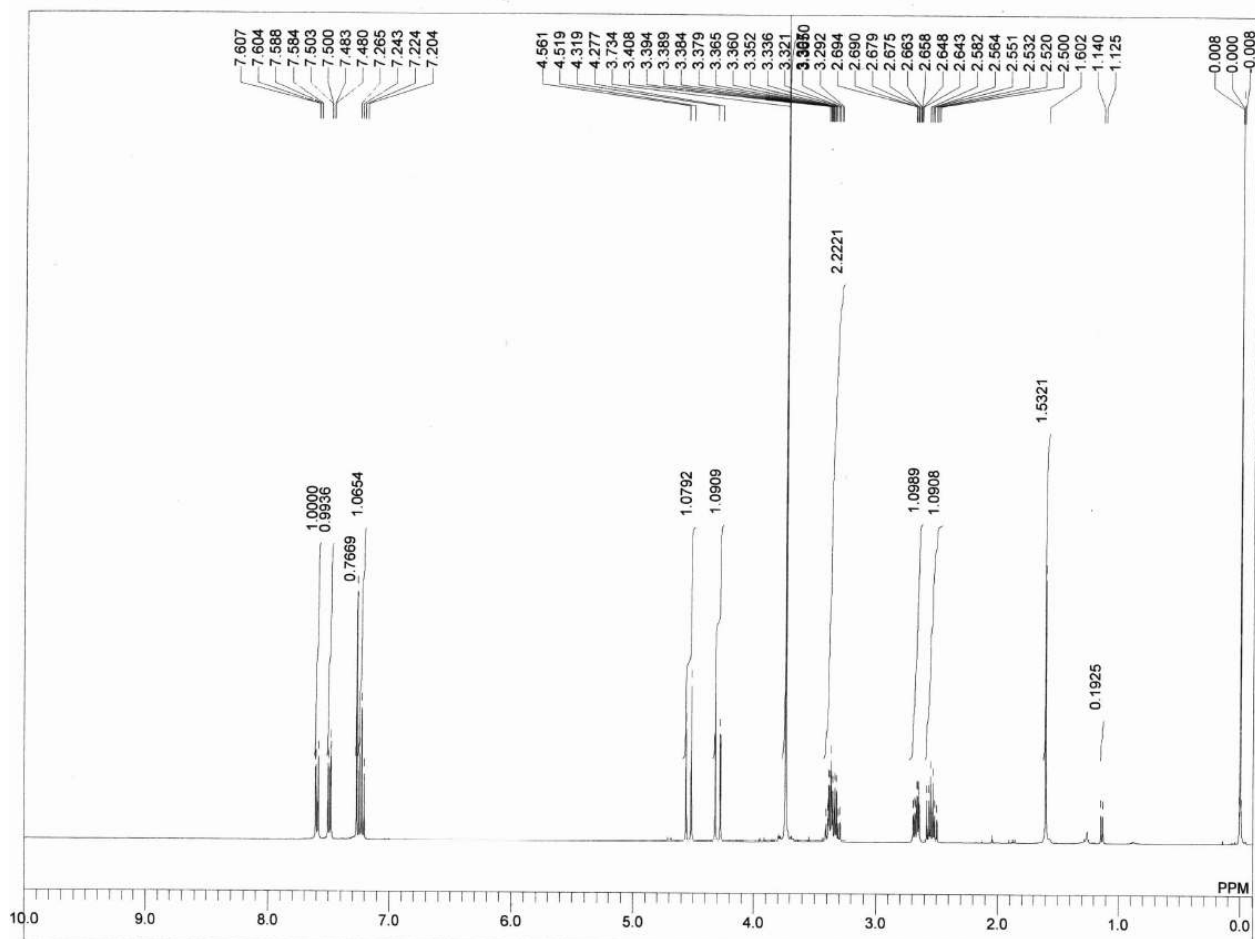

DFILE G:\Natsugari  
COMNT Thu Dec 27 1  
DATIM 1H  
OBNUC NON  
EXMOD  
OBFRQ 399.65 MH  
OBSET 124.00 KH  
OBFIN 10500.0 Hz  
POINT 32768  
FREQU 8000.0 Hz  
SCANS 64  
ACQTM 4.096 sec  
PD 2.904 sec  
PW1 6.2 us  
IRNUC 1H  
CTEMP 23.2 c  
SLVNT CDCL3  
EXREF 0.00 ppm  
BF 0.12 Hz  
RGAIN 20

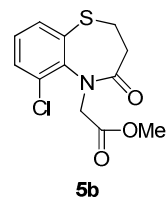

F:\Takada\carbon\42YYT1-174-32.als

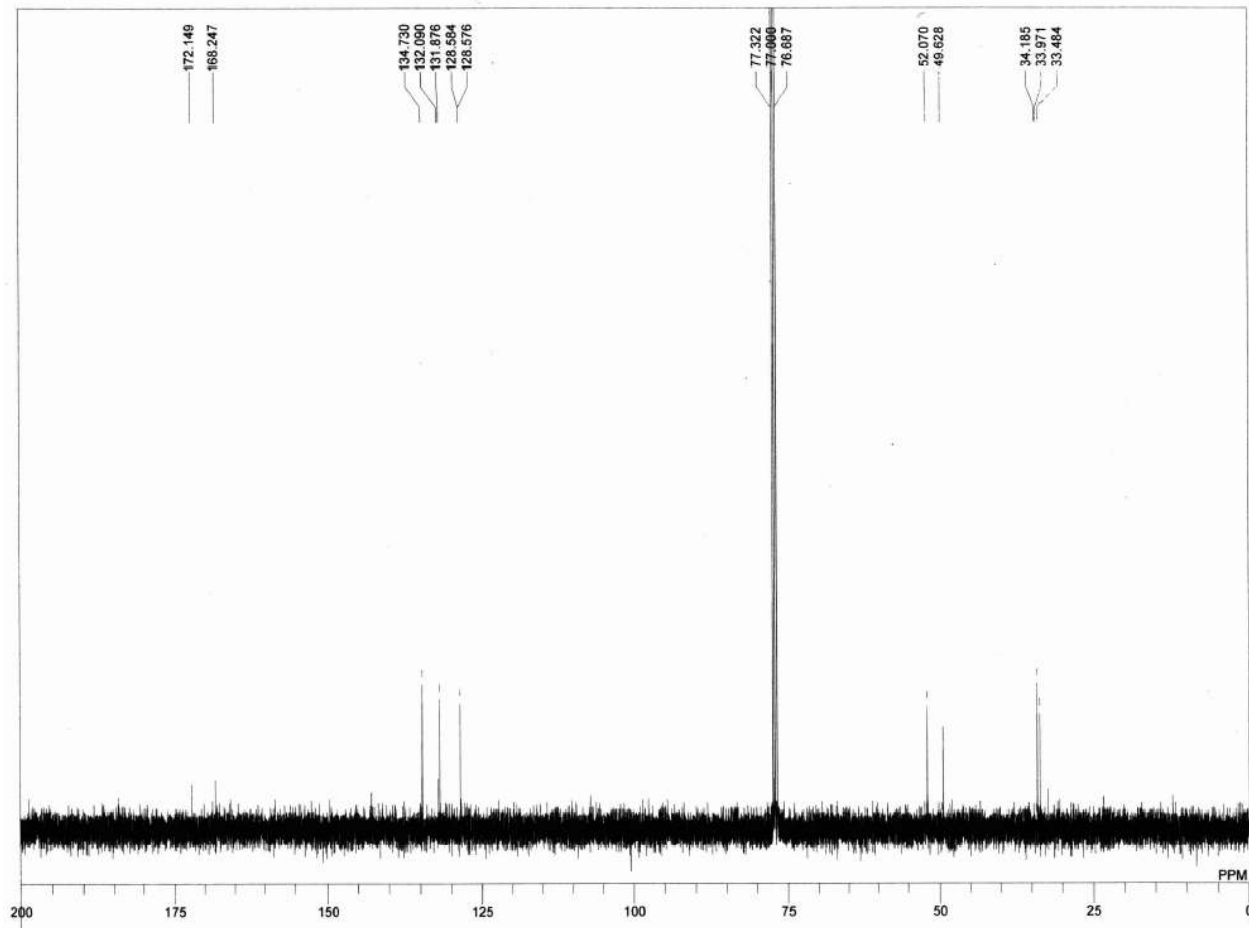

DFILE F:\Takada\carbon  
COMNT Mon Nov 08 13:51  
DATIM 13C  
OBNUC BCM  
EXMOD  
OBFRQ 100.40 MHz  
OBSET 125.00 KHz  
OBFIN 10500.0 Hz  
POINT 32768  
FREQU 27173.9 Hz  
SCANS 200  
ACQTM 1.206 sec  
PD 1.794 sec  
PW1 4.6 us  
IRNUC 1H  
CTEMP 24.4 c  
SLVNT CDCL3  
EXREF 77.00 ppm  
BF 0.12 Hz  
RGAIN 25

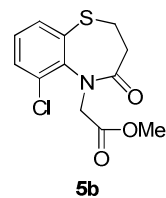



G:\Natsugari\42AHN2-68-20.als

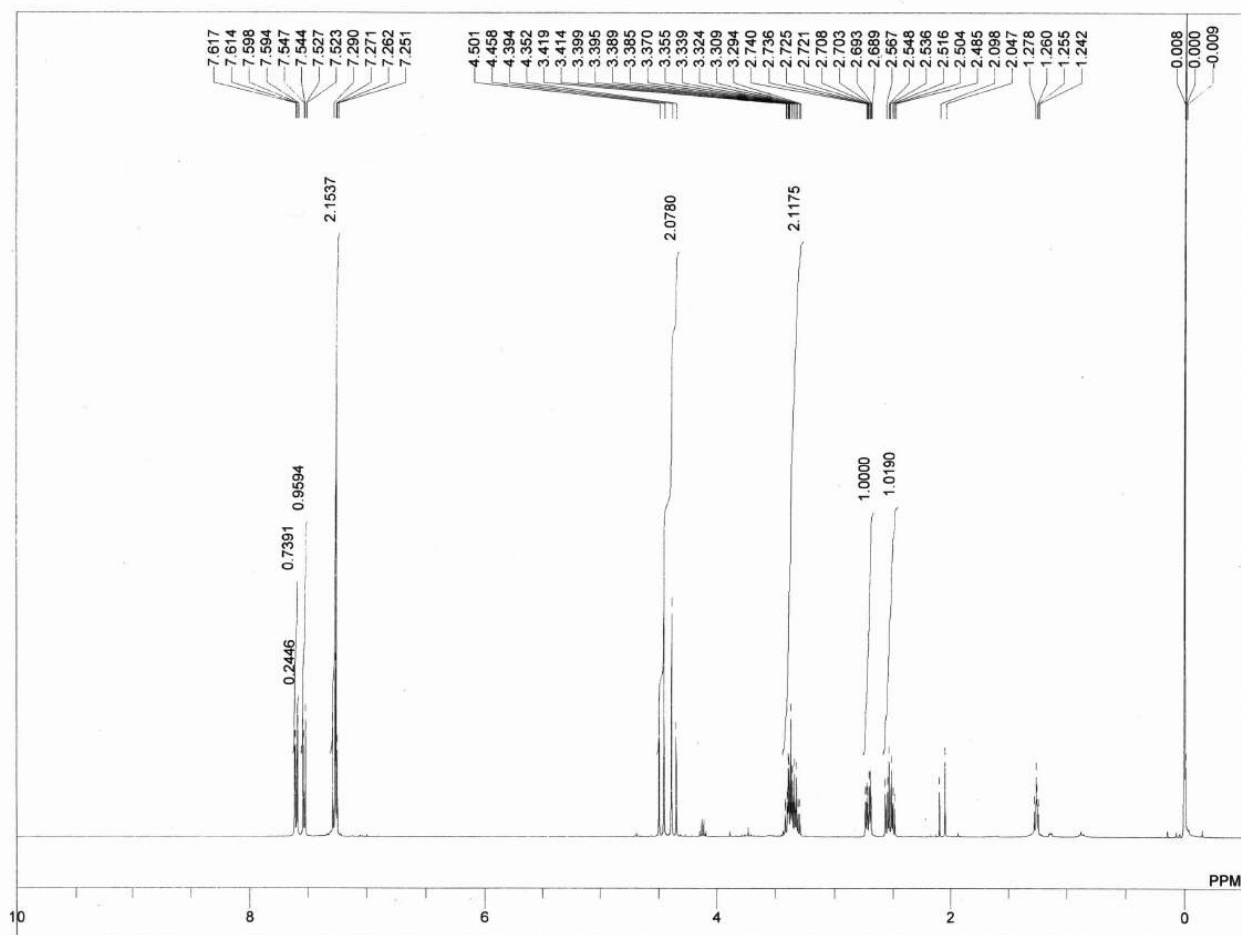

DFILE G:\Natsugari\4  
COMINT  
DATIM Sat Jan 12 13:  
OBNUC 1H  
EXMOD NON  
OBFRQ 399.65 MHz  
OBSET 124.00 KHz  
OBFIN 10500.0 Hz  
POINT 32768  
FREQU 8000.0 Hz  
SCANS 64  
AQTM 4.096 sec  
PD 2.904 sec  
PW1 6.2 us  
IRNUC 1H  
CTEMP 24.8 c  
SLVNT CDCL3  
EXREF 0.00 ppm  
BF 0.20 Hz  
RGAIN 21

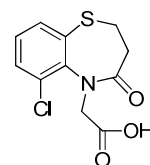

5b-COOH

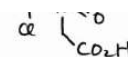

P:\Takada\carbon\42YYT1-99-40.als

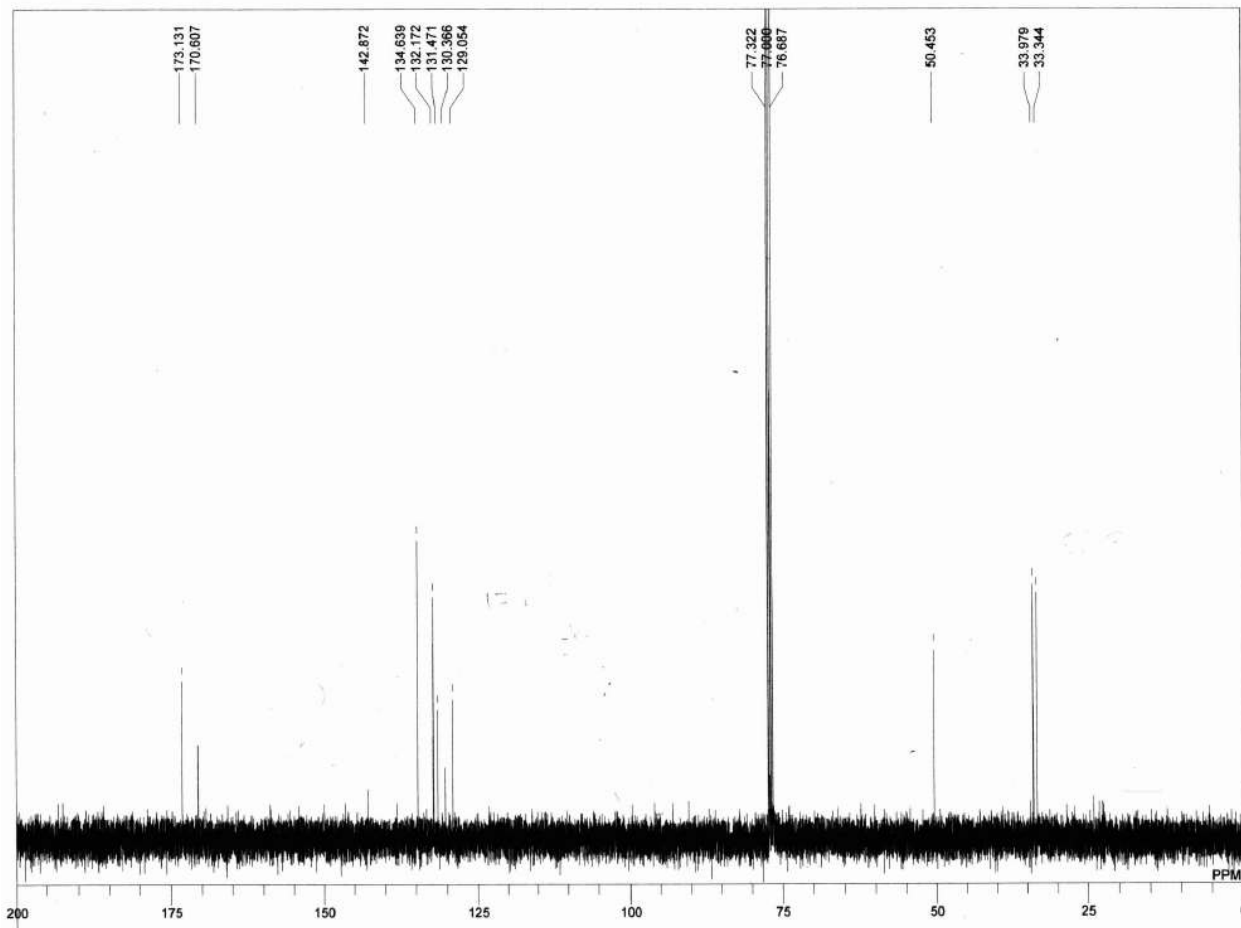

DFILE F:\Takada\carbon\4  
COMINT  
DATIM Tue Aug 10 09:52:  
OBNUC 13C  
EXMOD BCM  
OBFRQ 100.40 MHz  
OBSET 125.00 KHz  
OBFIN 10500.0 Hz  
POINT 32768  
FREQU 27173.9 Hz  
SCANS 256  
AQTM 1.206 sec  
PD 1.794 sec  
PW1 4.6 us  
IRNUC 1H  
CTEMP 24.6 c  
SLVNT CDCL3  
EXREF 77.00 ppm  
BF 0.12 Hz  
RGAIN 24

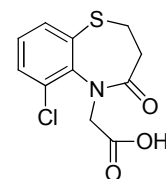

5b-COOH

F:\Tabata\Hta942\JHTA9-60-37.als

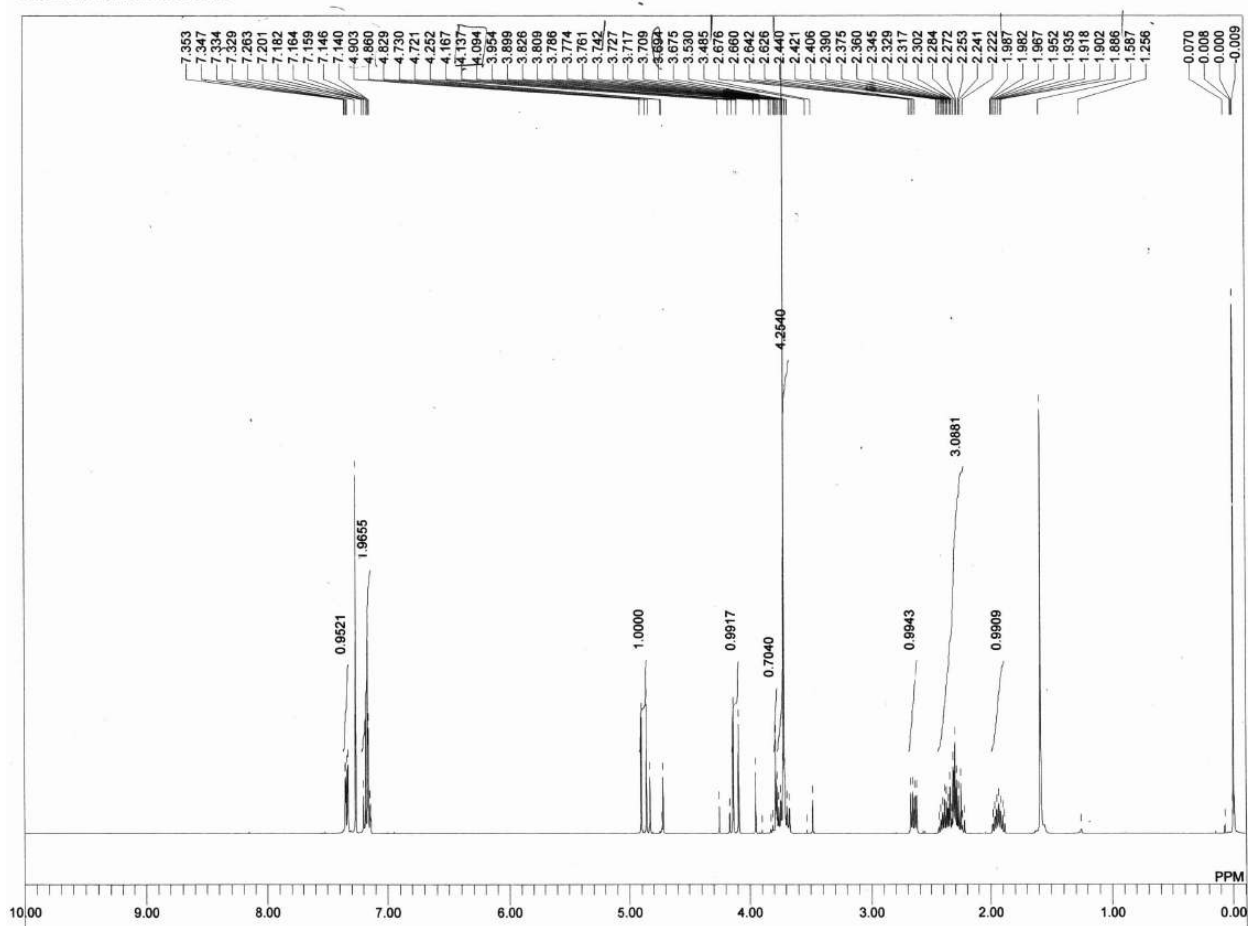

DFILE F:\Tabata\Hta942.J  
 COMNT Sun Aug 29 12:51:  
 DATIM 1H  
 OBNUC NON  
 EXMOD 399.65 MHz  
 OBFRQ 124.00 KHz  
 OBSET 10500.0 Hz  
 OBFIN 32768  
 POINT 8000.0 Hz  
 FREQU 128  
 SCANS 4.096 sec  
 ACQTM 2.904 sec  
 PD 6.2 us  
 PW1 1H  
 IRNUC 24.2 c  
 CTEMP CDCL3  
 SLVNT 0.00 ppm  
 EXREF 0.12 Hz  
 BF 20  
 RGAIN

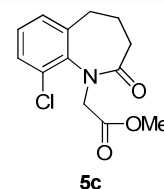

F:\Tabata\Hta942\JHTA9-60-37-C.als

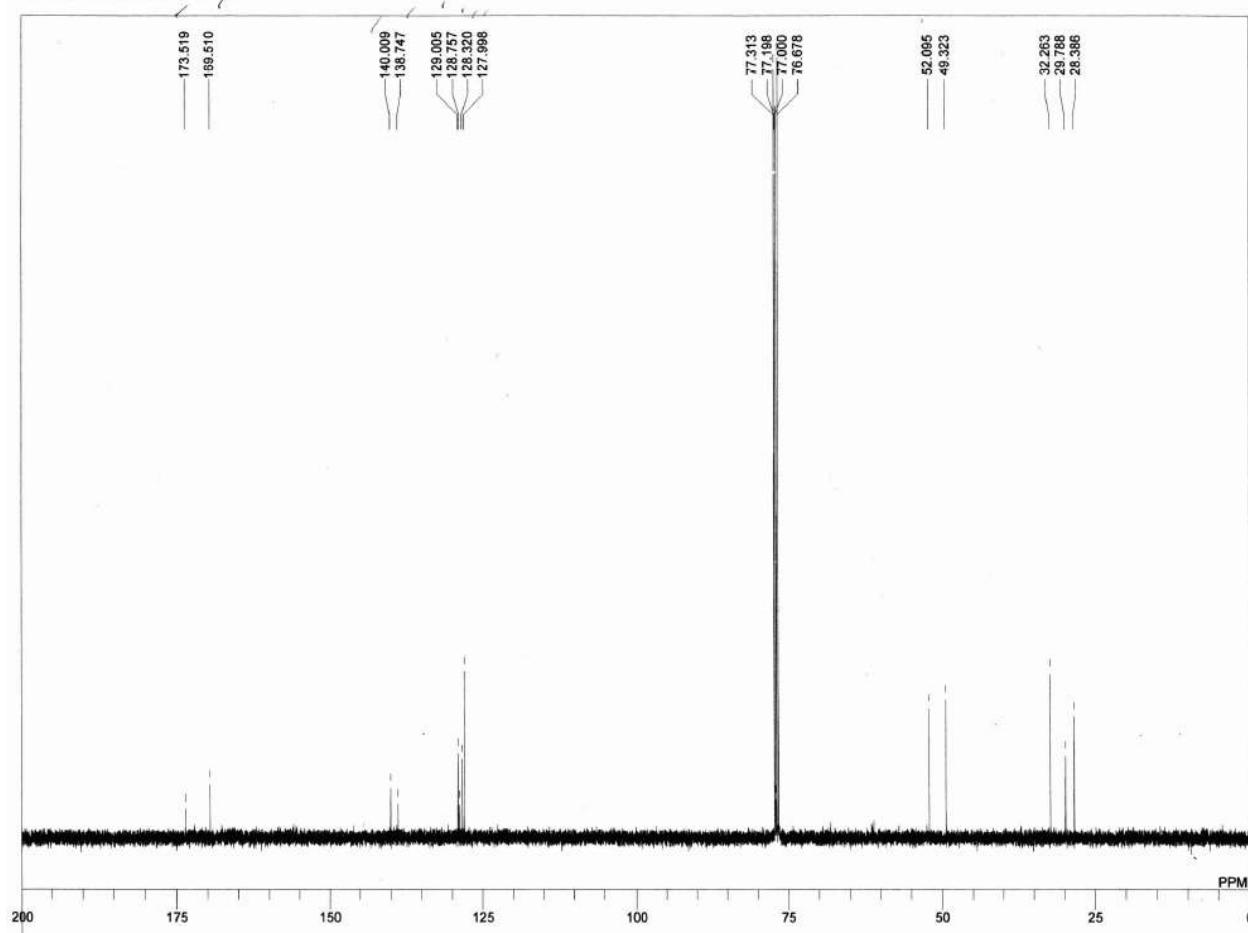

DFILE F:\Tabata\Hta942.J  
 COMNT Sun Aug 29 13:47:  
 DATIM 13C  
 OBNUC BCM  
 EXMOD 100.40 MHz  
 OBFRQ 125.00 KHz  
 OBSET 10500.0 Hz  
 OBFIN 32768  
 POINT 27173.9 Hz  
 FREQU 1024  
 SCANS 1.206 sec  
 ACQTM 1.794 sec  
 PD 4.6 us  
 PW1 1H  
 IRNUC 25.4 c  
 CTEMP CDCL3  
 SLVNT 77.00 ppm  
 EXREF 0.12 Hz  
 BF 25  
 RGAIN

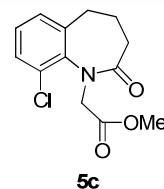

F:\Tabata\Hmr\H42\HTA9-80-49.ab

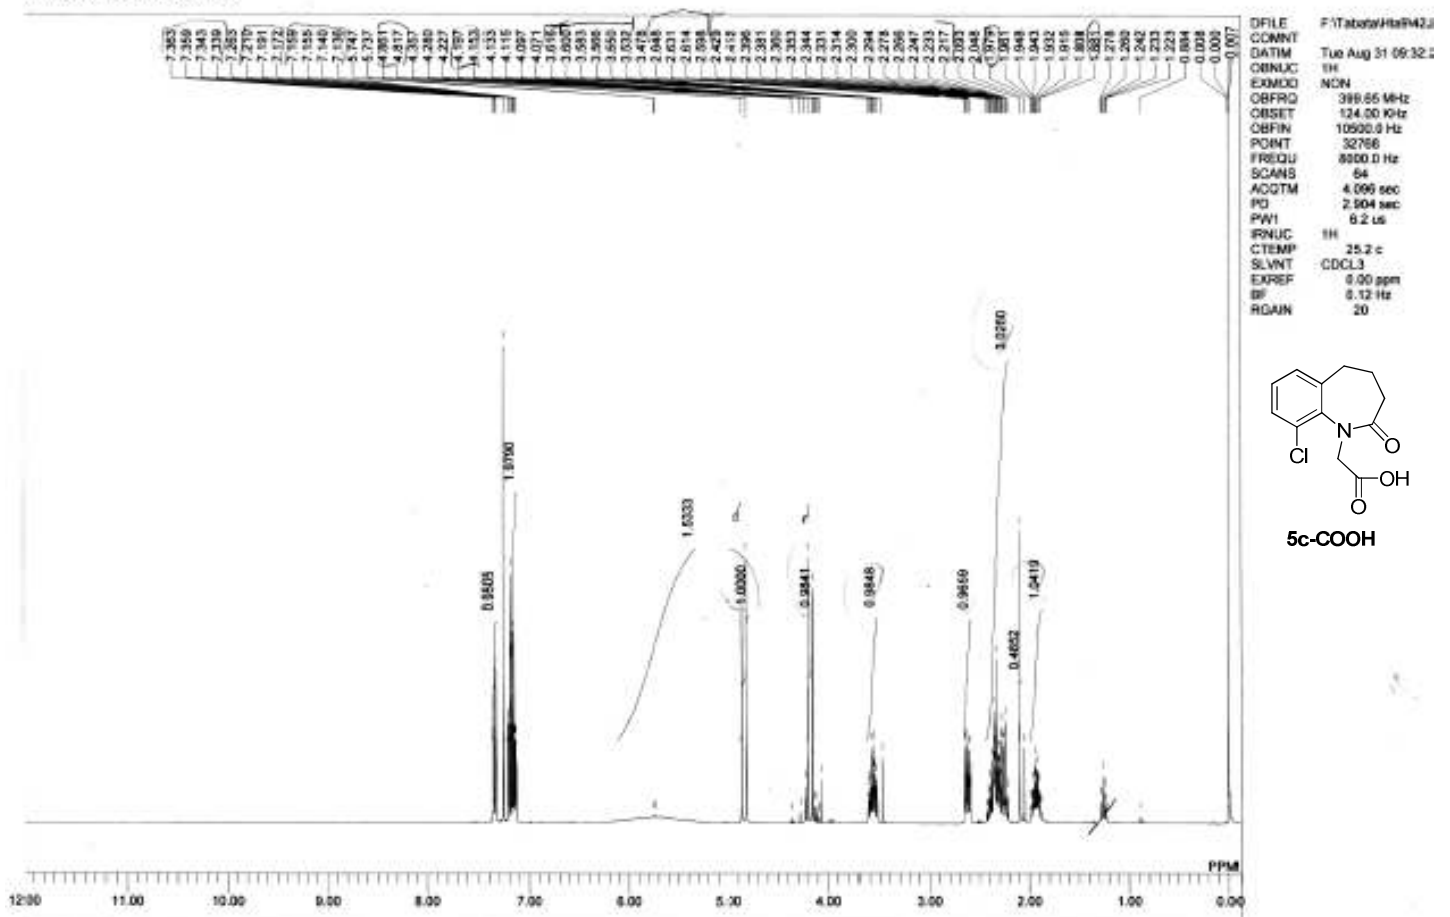

C:\ALICER5\DATA\Tabata\2006.10\H42\HTA9-80-49-C.ab

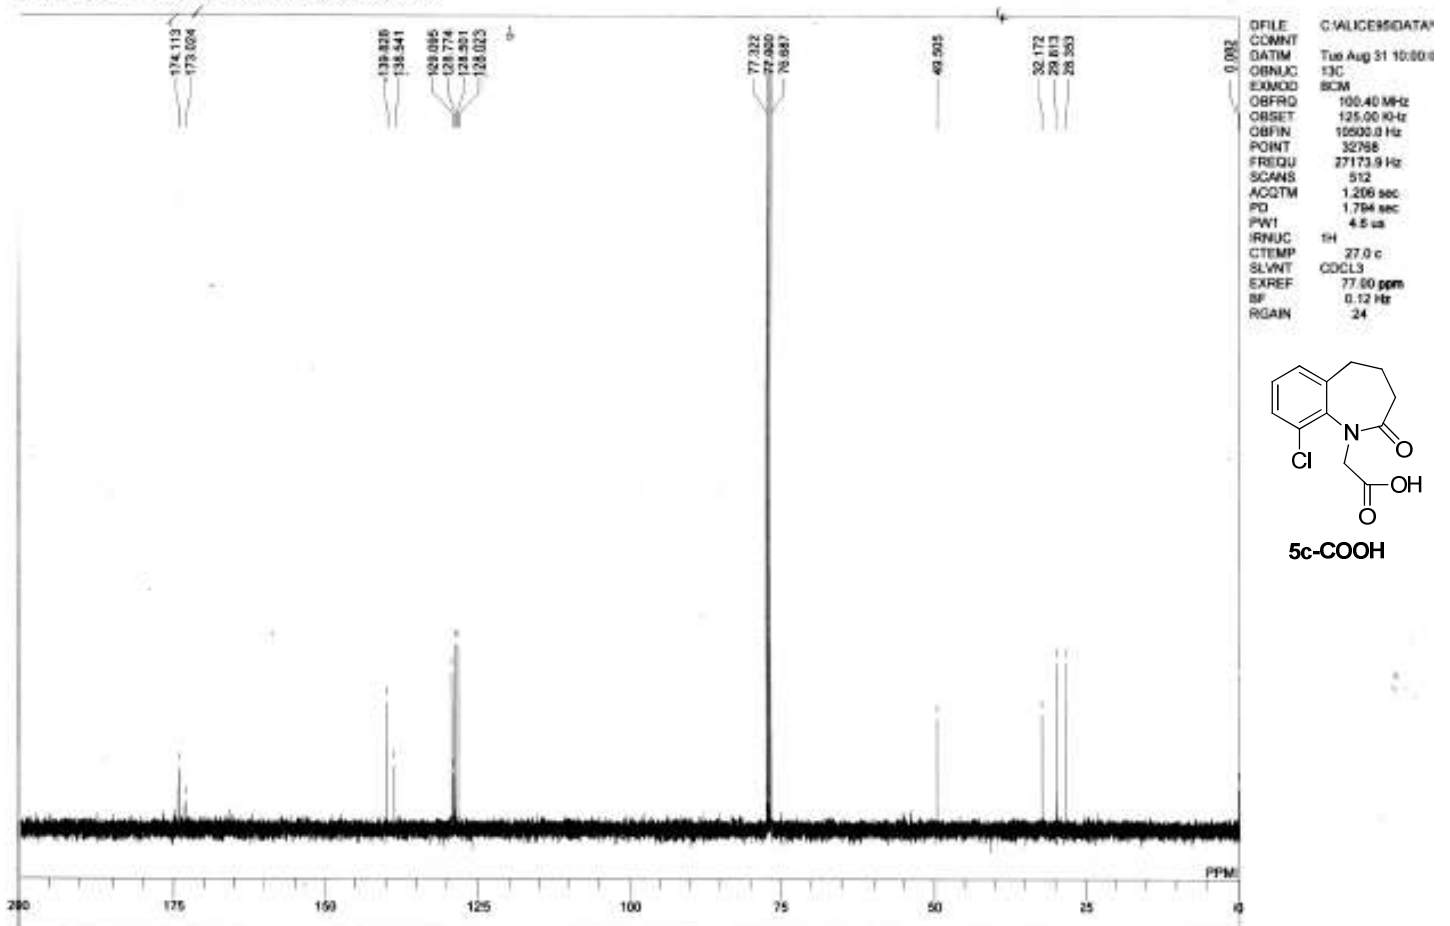

F:\Wada\42PNW-2-117-25.als

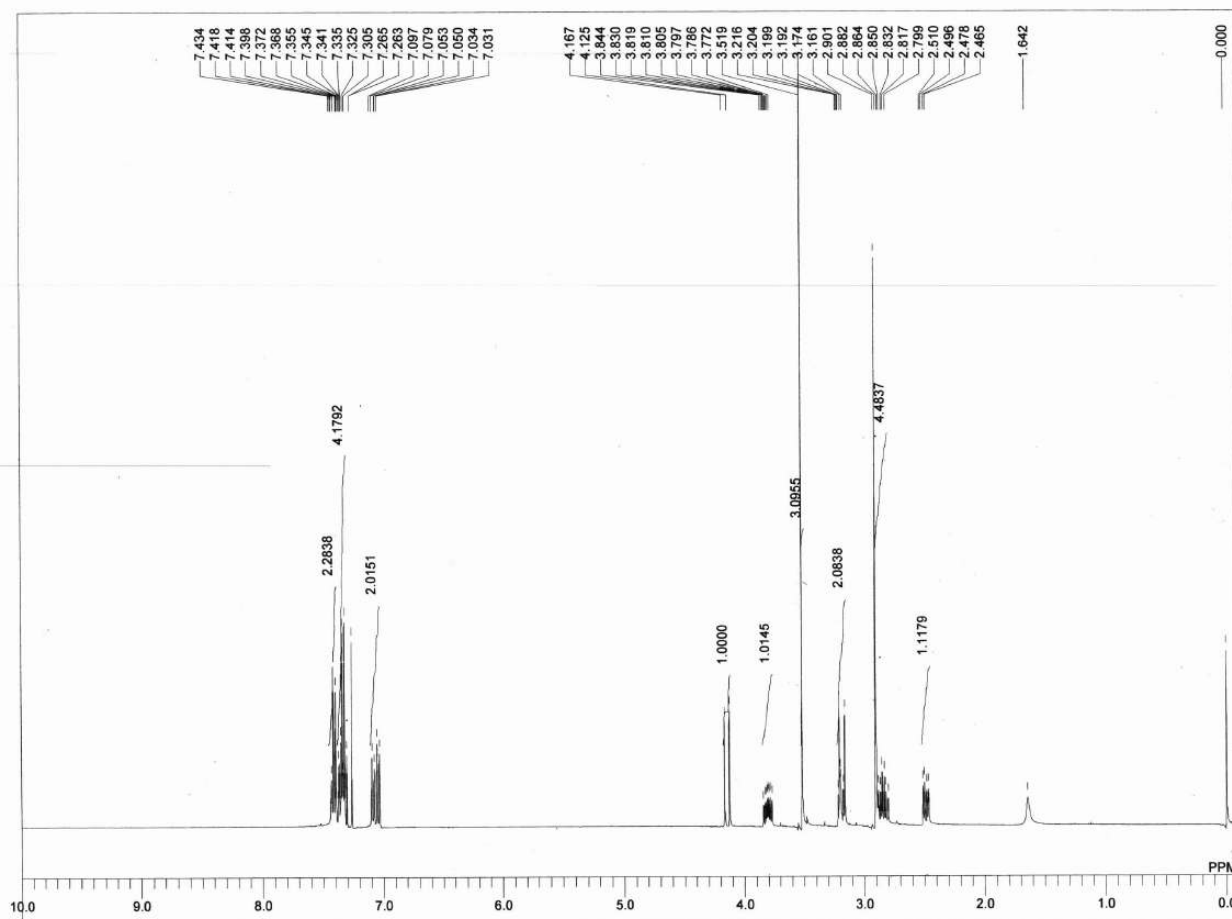

DFILE F:\Wada\42PNW-2  
 COMNT Wed Nov 11 20:06  
 DATIM 1H  
 OBNUC NON  
 EXMOD 399.65 MHz  
 QBFRQ 124.00 KHz  
 OBSET 10500.0 Hz  
 OBFIN 32768  
 POINT 8000.0 Hz  
 FREQU 16  
 SCANS 4.096 sec  
 ACQTM 2.904 sec  
 PD 6.2 us  
 PW1 1H  
 IRNUC 21.8 c  
 CTEMP CDCL3  
 SLVNT 0.00 ppm  
 EXREF BF 0.12 Hz  
 RGAIN 16

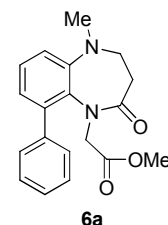

F:\Wada\42PNW-2-117-25-carbon.als

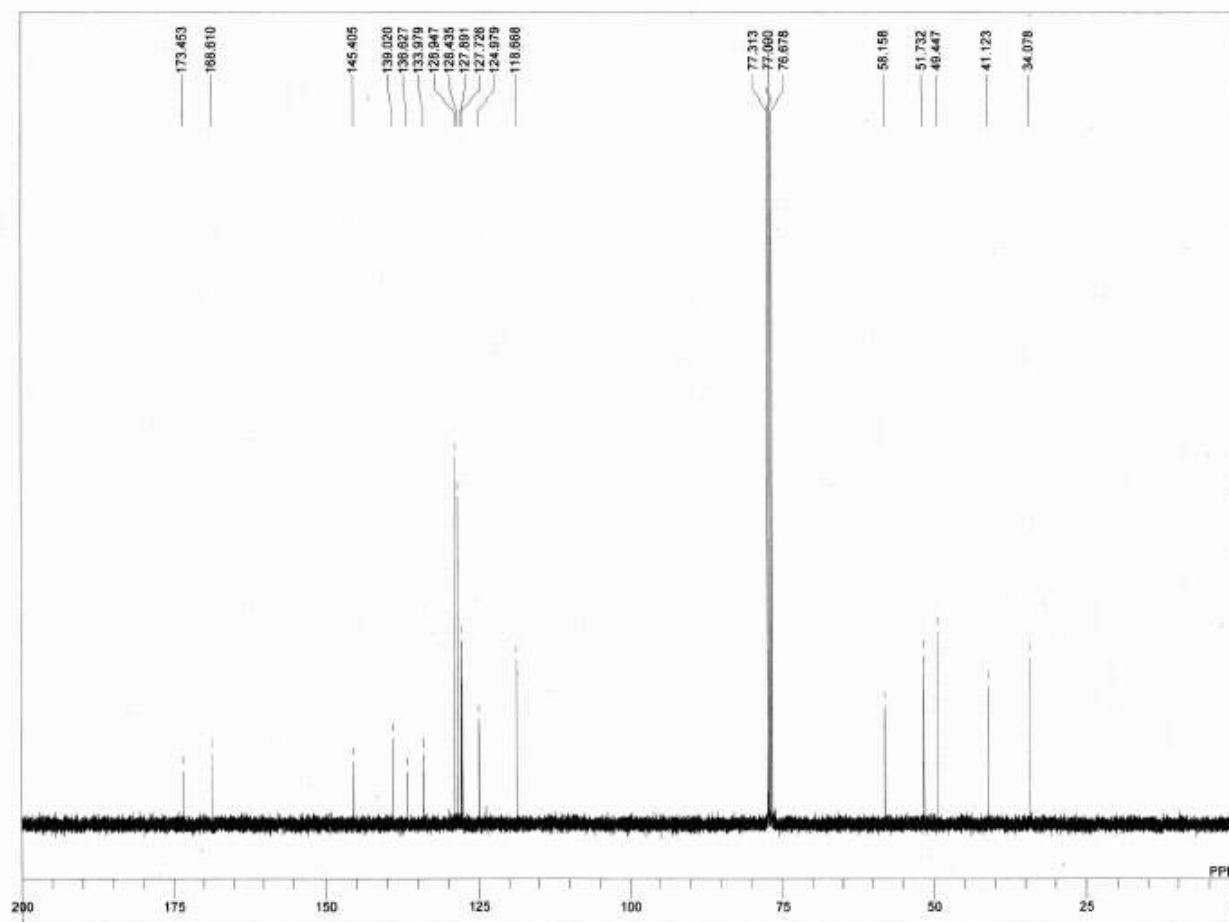

DFILE F:\Wada\42PNW-2  
 COMNT Wed Nov 11 20:32  
 DATIM 13C  
 OBNUC BCM  
 EXMOD 100.40 MHz  
 QBFRQ 125.00 KHz  
 OBSET 10500.0 Hz  
 OBFIN 32768  
 POINT 27173.9 Hz  
 FREQU 512  
 SCANS 1.206 sec  
 ACQTM 1.794 sec  
 PD 4.6 us  
 PW1 1H  
 IRNUC 22.6 c  
 CTEMP CDCL3  
 SLVNT 77.00 ppm  
 EXREF BF 0.12 Hz  
 RGAIN 24

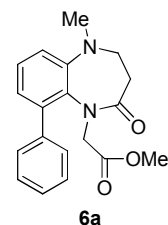

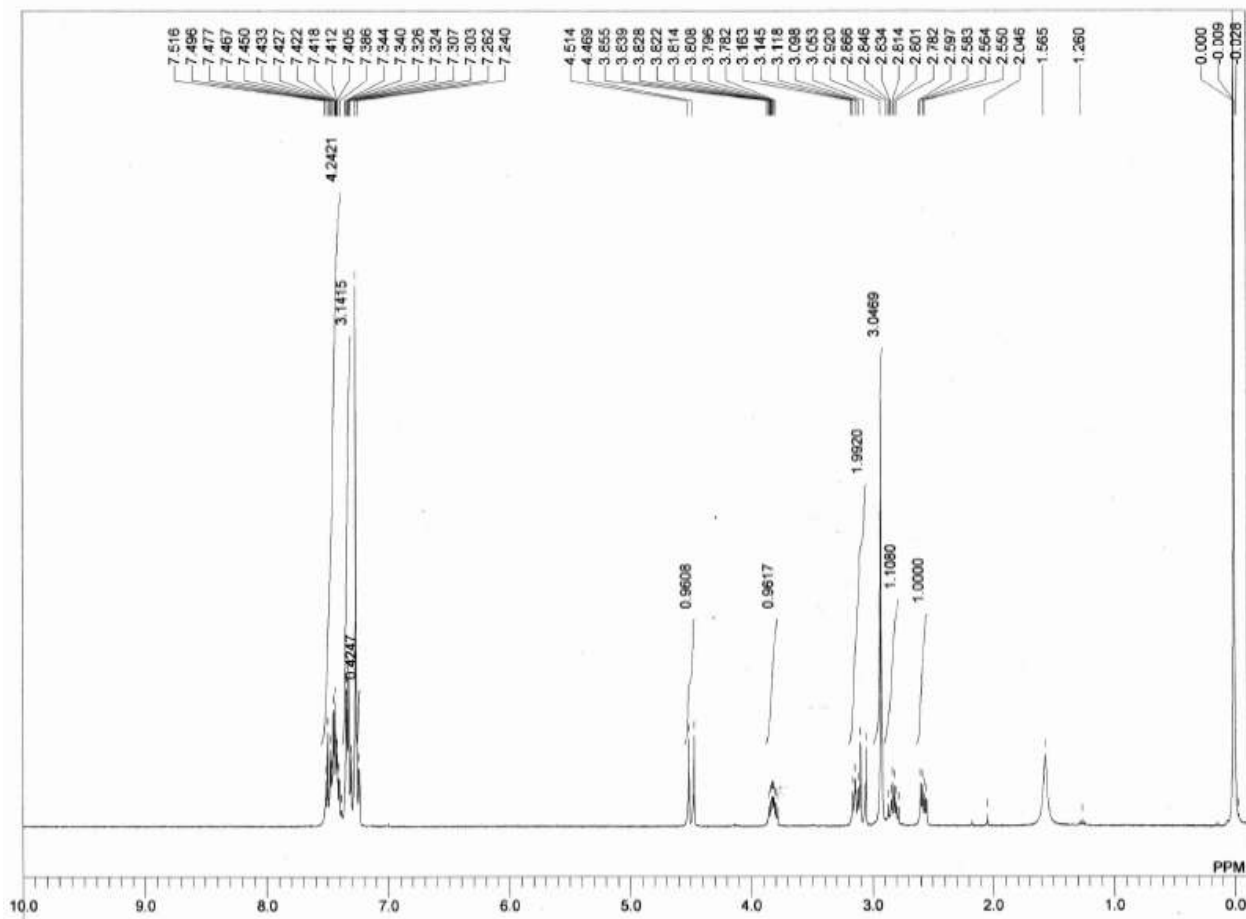

DFILE G:\Wada\42PNW-2  
COMNT  
DATIM Fri Apr 24 19:21  
OBNUC 1H  
EXMOD NON  
OBFRQ 399.65 MHz  
OBSET 124.00 KHz  
OBFIN 10500.0 Hz  
POINT 32768  
FREQU 8000.0 Hz  
SCANS 16  
ACQTM 4.096 sec  
PD 2.904 sec  
PW1 6.2 us  
IRNUC 1H  
CTEMP 23.3 c  
SLVNT CDCL3  
EXREF 0.00 ppm  
BF 0.12 Hz  
RGAIN 21

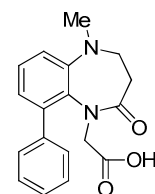

6a-COOH

F:\Wada\42PNW-2-189-39-carbon.als

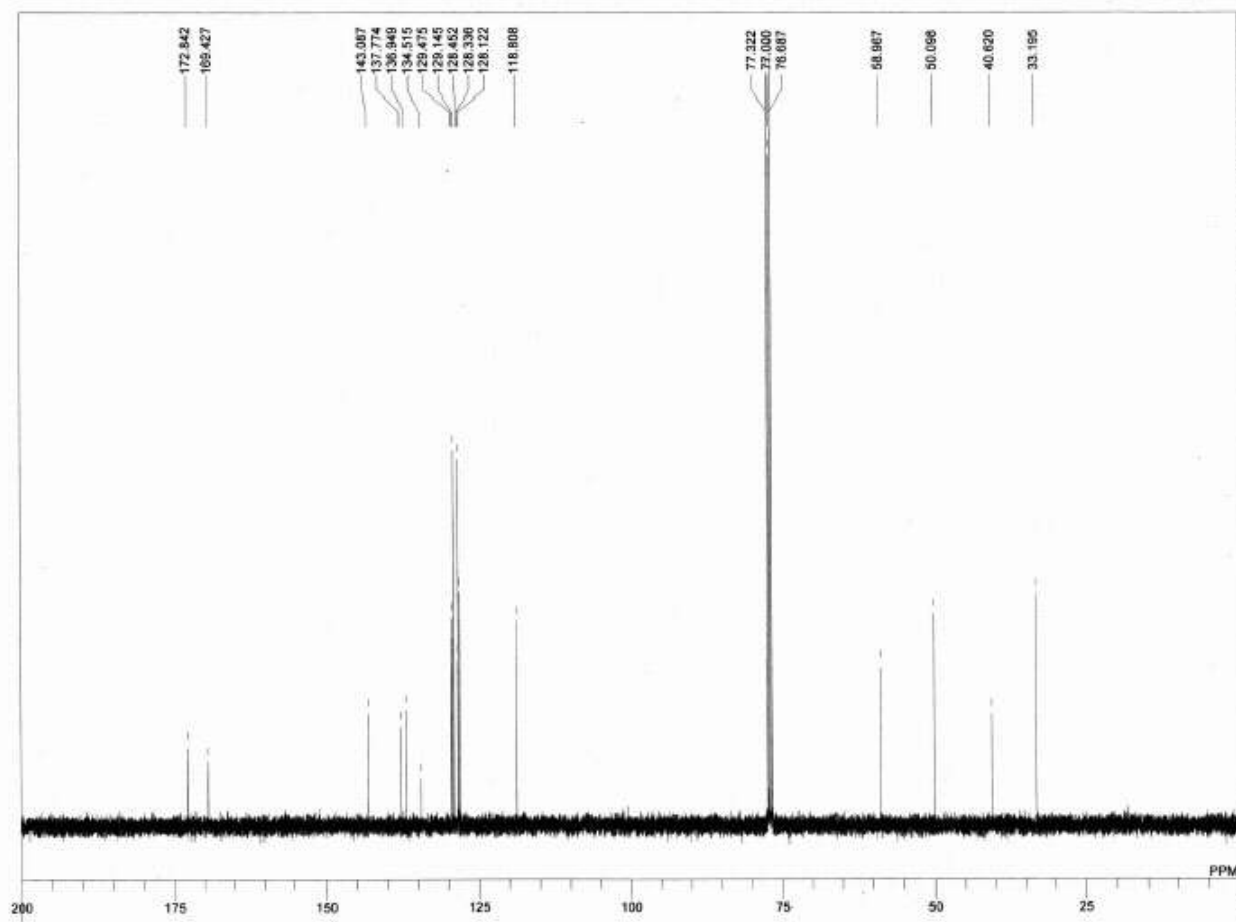

DFILE F:\Wada\42PNW-2  
COMNT  
DATIM Wed Nov 11 21:07  
OBNUC 13C  
EXMOD BCM  
OBFRQ 100.40 MHz  
OBSET 125.00 KHz  
OBFIN 10500.0 Hz  
POINT 32768  
FREQU 27173.9 Hz  
SCANS 512  
ACQTM 1.206 sec  
PD 1.794 sec  
PW1 4.6 us  
IRNUC 1H  
CTEMP 22.8 c  
SLVNT CDCL3  
EXREF 77.00 ppm  
BF 0.12 Hz  
RGAIN 24

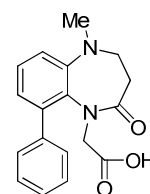

6a-COOH

F:\Tabata\Hta9\42JHTA9-105-35H.als

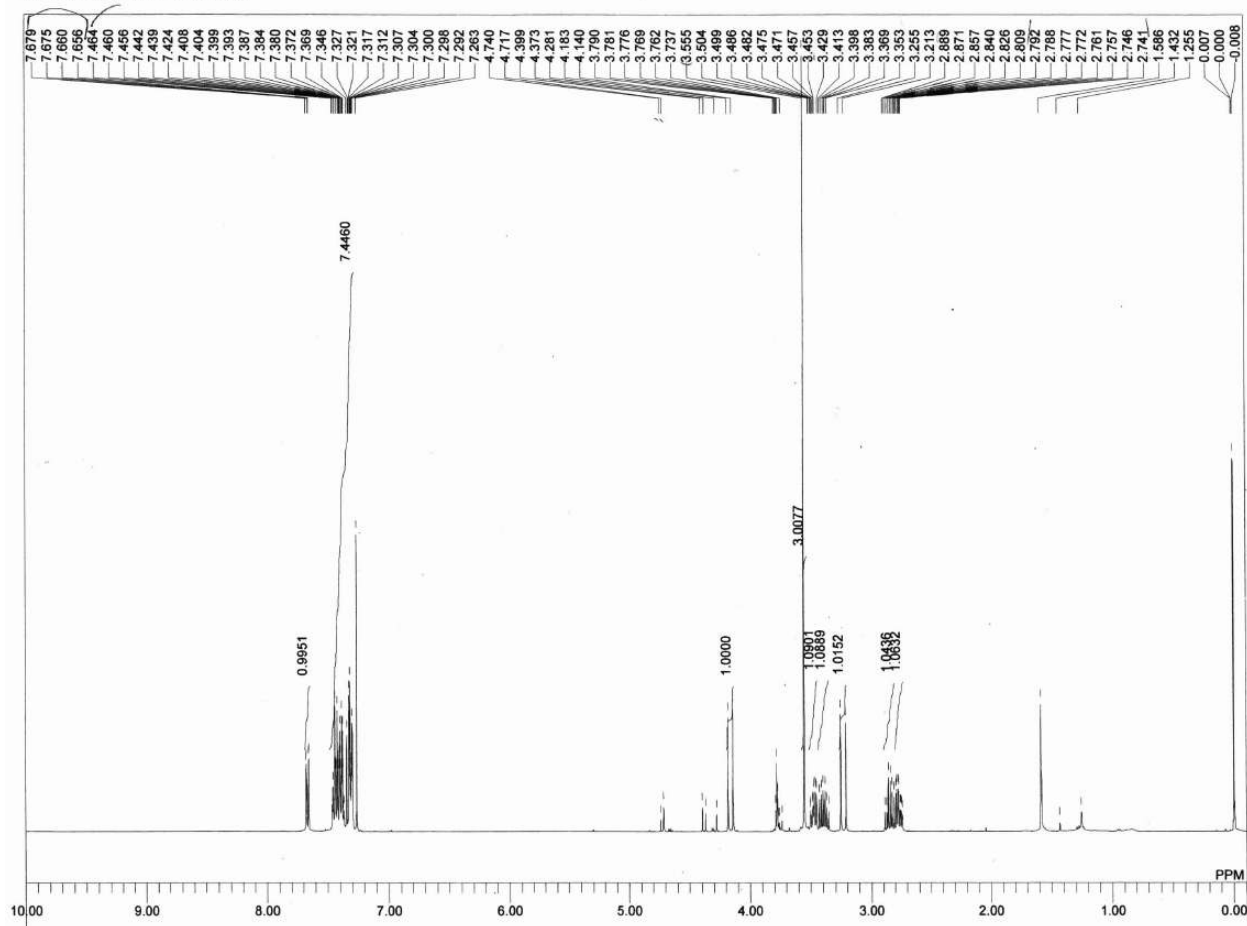

DFILE F:\Tabata\Hta9\42J  
COMNT  
DATIM Tue Mar 08 15:51:1  
OBNUC 1H  
EXMOD NON  
OBFRQ 399.65 MHz  
OBSET 124.00 KHz  
OBFIN 10500.0 Hz  
POINT 32768  
FREQU 8000.0 Hz  
SCANS 64  
ACQTM 4.096 sec  
PD 2.904 sec  
PW1 6.2 us  
IRNUC 1H  
CTEMP 23.4 c  
SLVNT CDCL3  
EXREF 0.00 ppm  
BF 0.12 Hz  
RGAIN 19

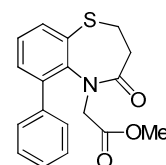

6b

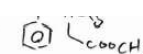

F:\Tabata\Hta9\42JHTA9-105-35C.als

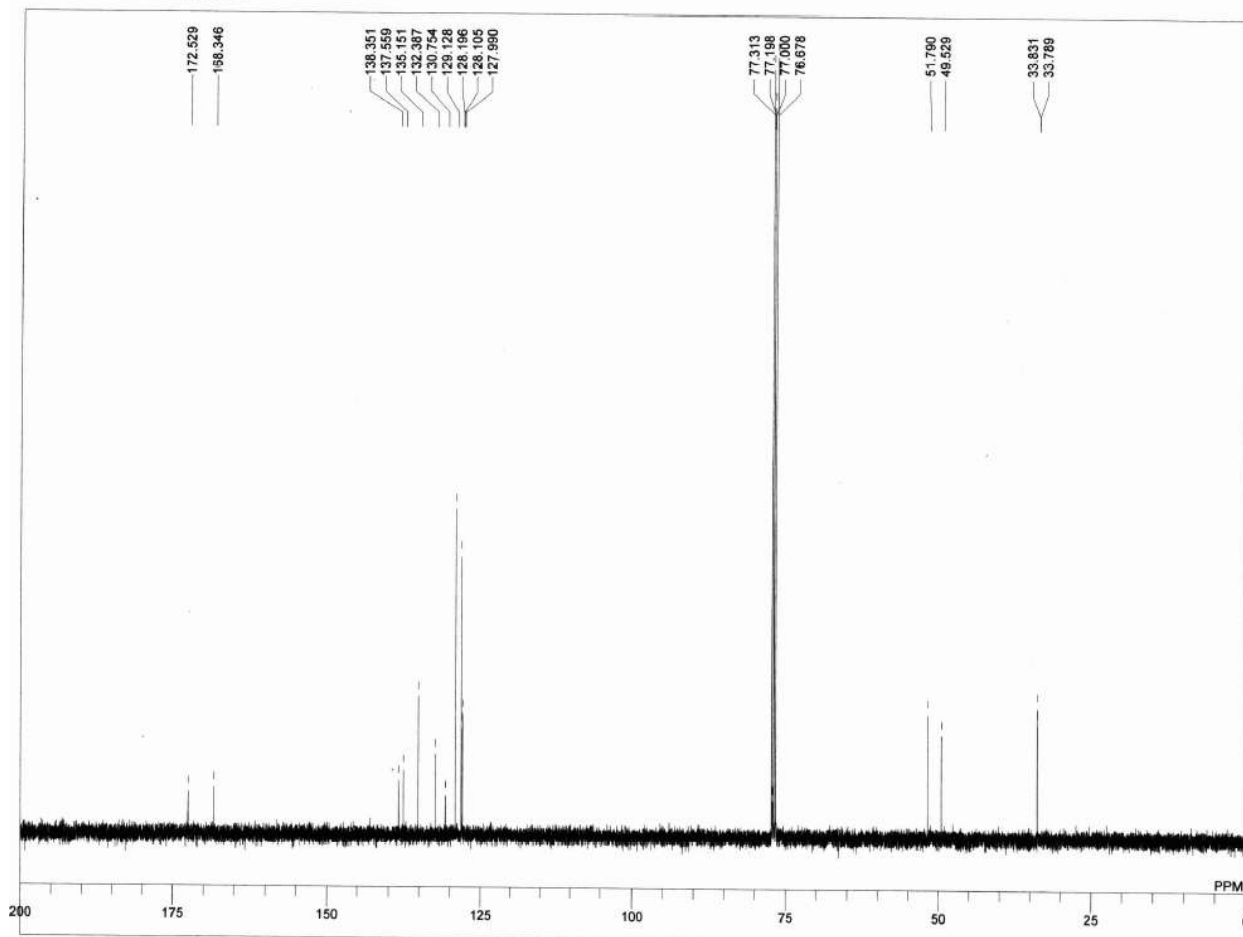

DFILE F:\Tabata\Hta9\42J  
COMNT  
DATIM Tue Mar 08 16:24:  
OBNUC 13C  
EXMOD BCM  
OBFRQ 100.40 MHz  
OBSET 125.00 KHz  
OBFIN 10500.0 Hz  
POINT 32768  
FREQU 27173.9 Hz  
SCANS 512  
ACQTM 1.208 sec  
PD 1.794 sec  
PW1 4.6 us  
IRNUC 1H  
CTEMP 24.3 c  
SLVNT CDCL3  
EXREF 77.00 ppm  
BF 0.12 Hz  
RGAIN 24

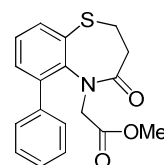

6b

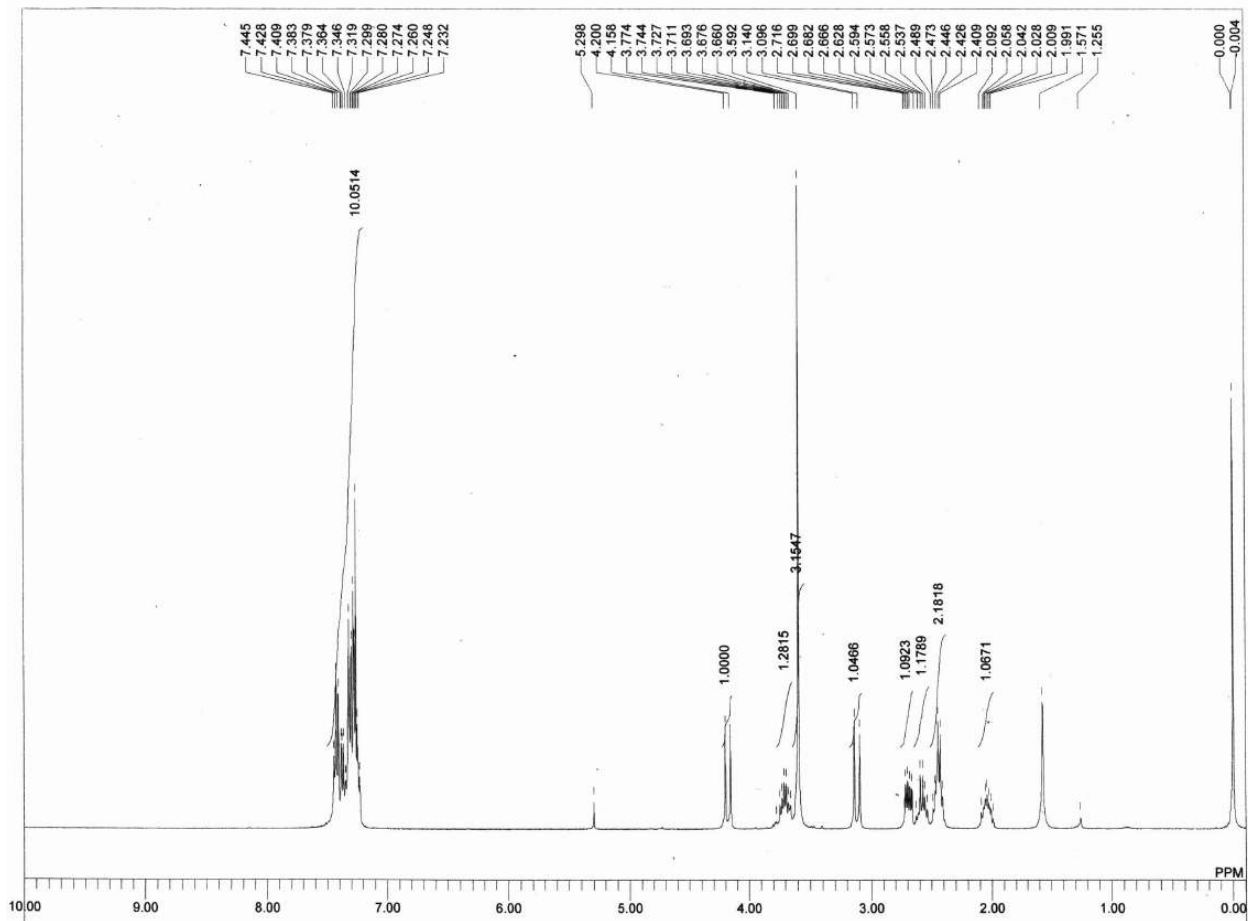

DFILE F:\Tabata\Hta9\42J  
 COMNT Mon Feb 07 16:10:  
 DATIM 1H  
 OBNUC 1H  
 EXMOD NON  
 OBFRQ 399.65 MHz  
 OBSET 124.00 KHz  
 OBFIN 10500.0 Hz  
 POINT 32768  
 FREQU 8000.0 Hz  
 SCANS 16  
 ACQTM 4.096 sec  
 PD 2.904 sec  
 PW1 6.2 us  
 IRNUC 1H  
 CTEMP 25.7 c  
 SLVNT CDCL3  
 EXREF 0.00 ppm  
 BF 0.12 Hz  
 RGAIN 20

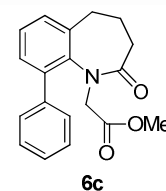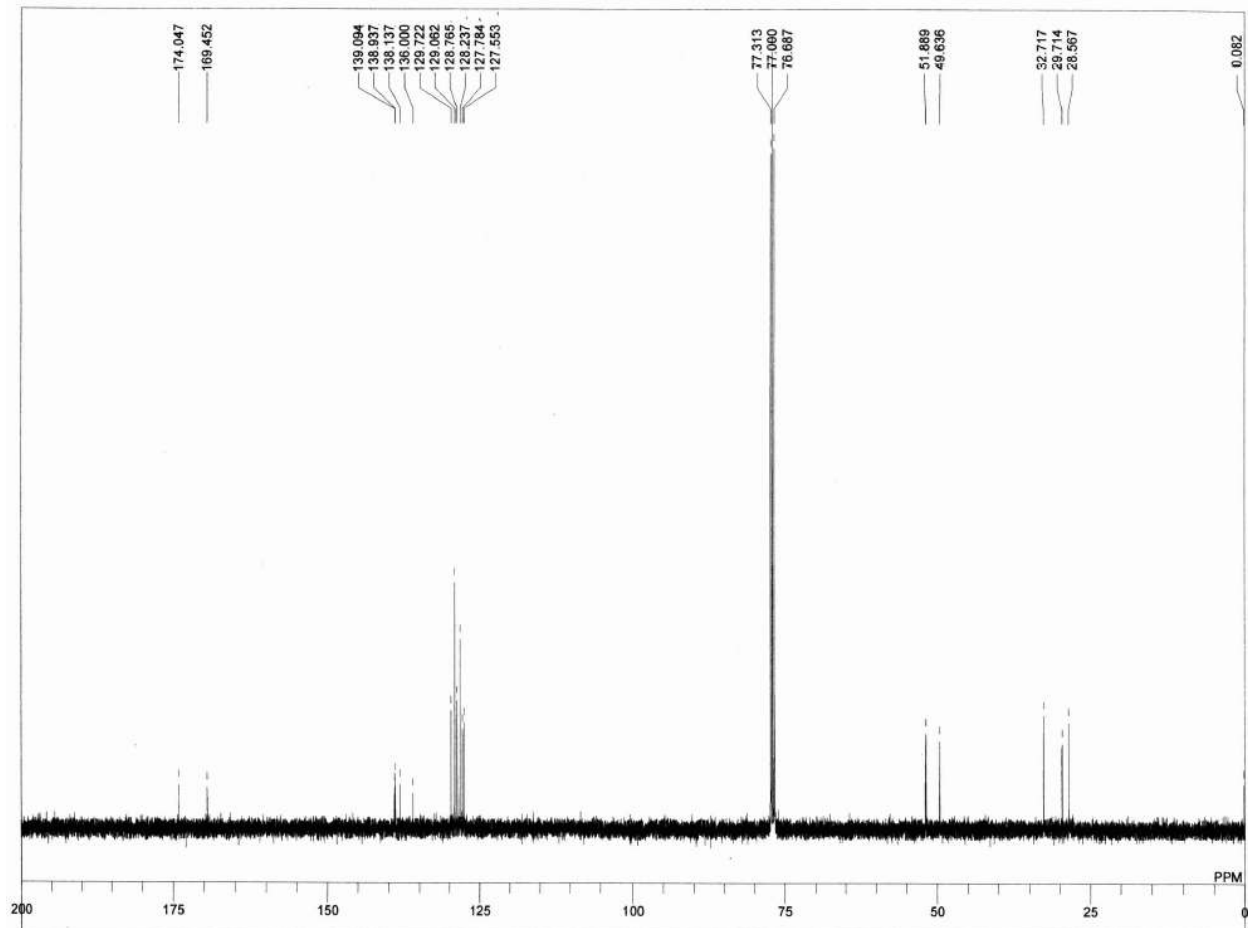

DFILE F:\Tabata\Hta9\42J  
 COMNT Mon Feb 07 16:59:  
 DATIM 13C  
 OBNUC 13C  
 EXMOD BCM  
 OBFRQ 100.40 MHz  
 OBSET 125.00 KHz  
 OBFIN 10500.0 Hz  
 POINT 32768  
 FREQU 27173.9 Hz  
 SCANS 1024  
 ACQTM 1.206 sec  
 PD 1.794 sec  
 PW1 4.6 us  
 IRNUC 1H  
 CTEMP 26.4 c  
 SLVNT CDCL3  
 EXREF 77.00 ppm  
 BF 0.12 Hz  
 RGAIN 24

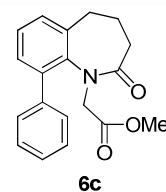

F:\Wada\42PNW2-69-35.als

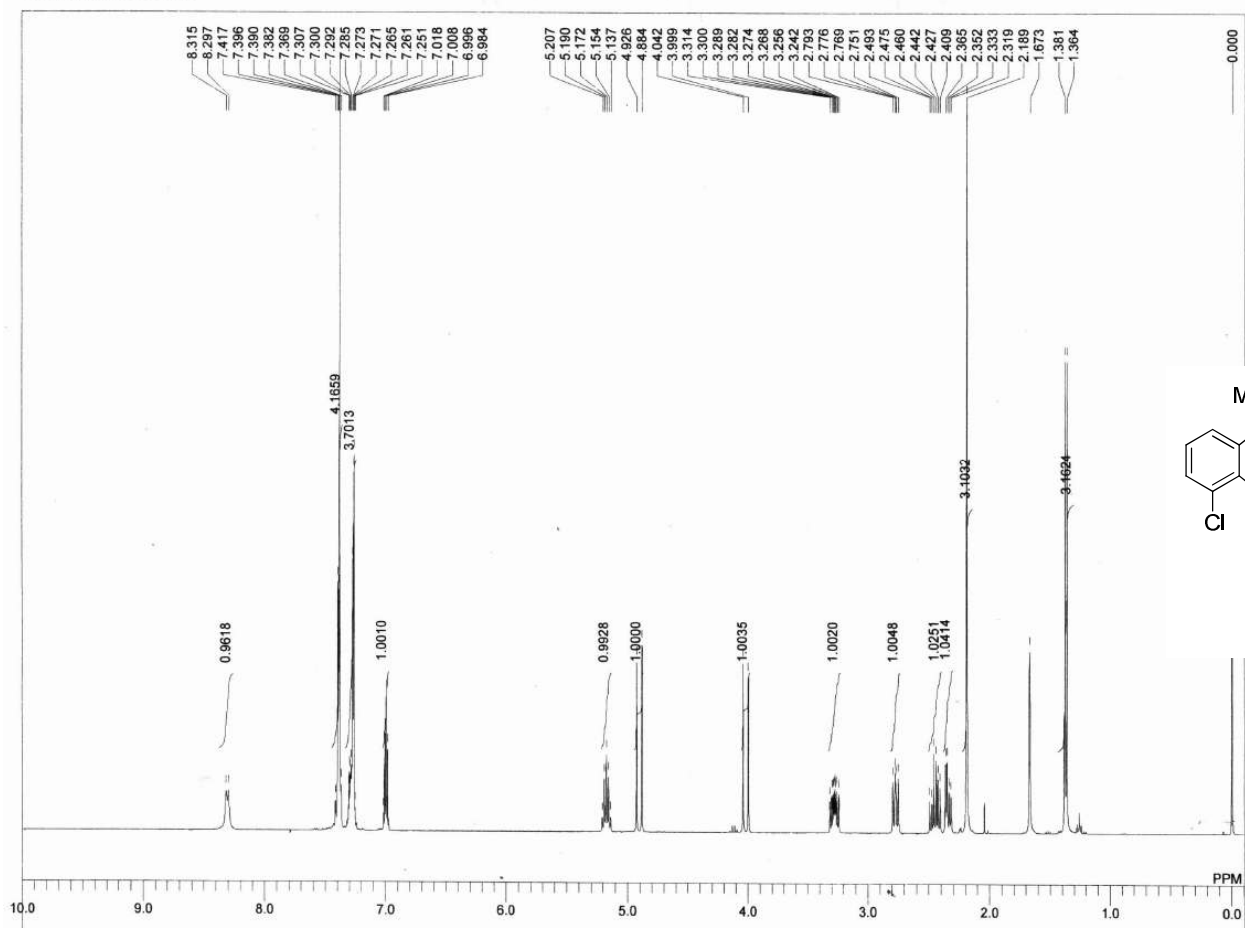

DFILE F:\Wada\42PNW2-  
 COMNT Mon Dec 28 22:09:  
 DATIM 1H  
 OBNUC 1H  
 EXMOD NON  
 OBFRQ 399.65 MHz  
 OBSET 124.00 KHz  
 OBFIN 10500.0 Hz  
 POINT 32768  
 FREQU 8000.0 Hz  
 SCANS 16  
 ACQTM 4.096 sec  
 PD 2.904 sec  
 PW1 6.2 us  
 IRNUC 1H  
 CTEMP 23.8 c  
 SLVNT CDCL3  
 EXREF 0.00 ppm  
 BF 0.12 Hz  
 RGAIN 18

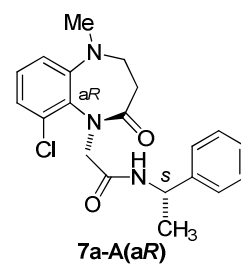

F:\Wada\42PNW2-69-35-carbon.als

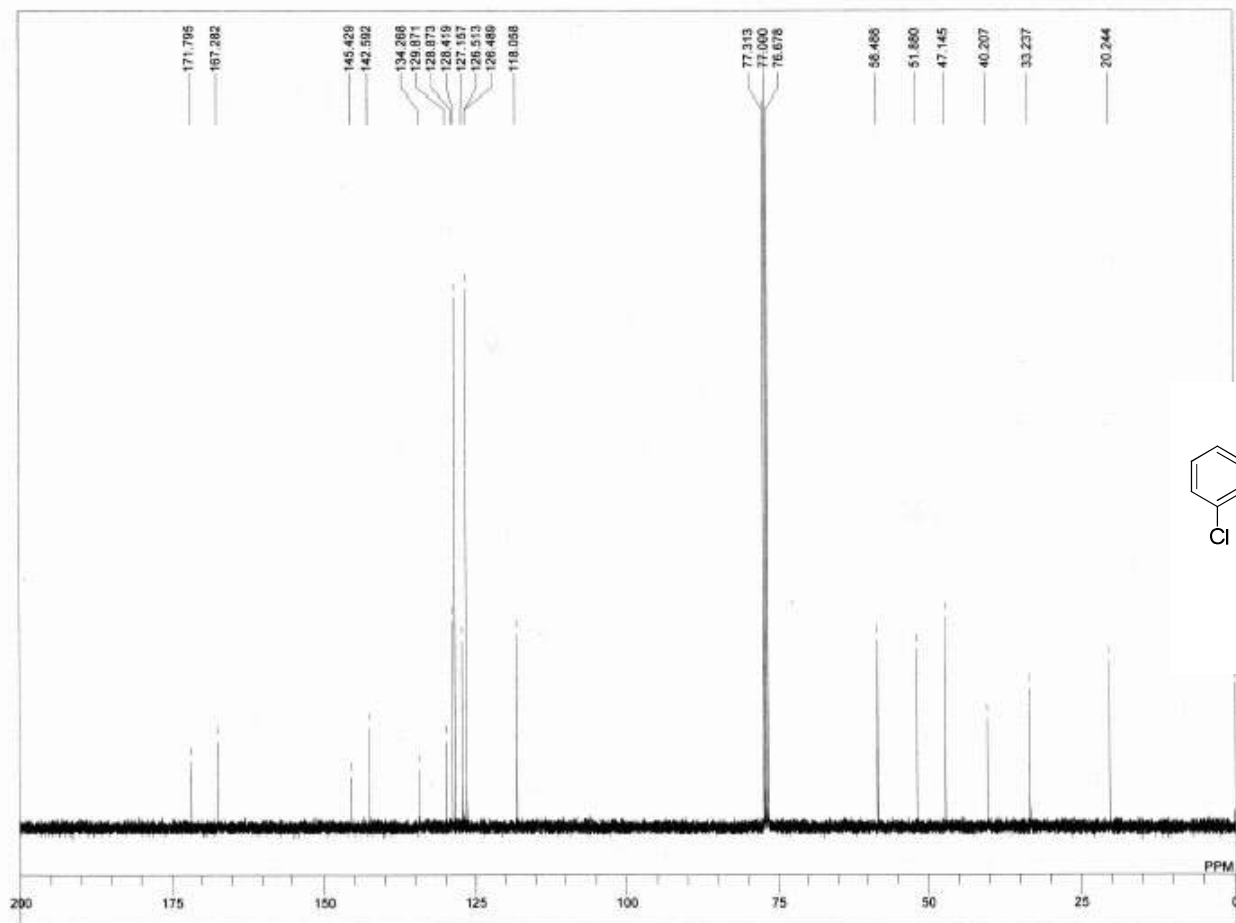

DFILE F:\Wada\42PNW2-  
 COMNT Mon Dec 28 22:58:  
 DATIM 13C  
 OBNUC 13C  
 EXMOD BCM  
 OBFRQ 100.40 MHz  
 OBSET 125.00 KHz  
 OBFIN 10500.0 Hz  
 POINT 32768  
 FREQU 27173.9 Hz  
 SCANS 1024  
 ACQTM 1.206 sec  
 PD 1.794 sec  
 PW1 4.6 us  
 IRNUC 1H  
 CTEMP 24.8 c  
 SLVNT CDCL3  
 EXREF 77.00 ppm  
 BF 0.12 Hz  
 RGAIN 24

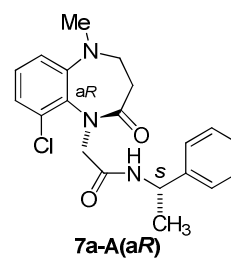



F:\Wada\42PNW2-69-51.als

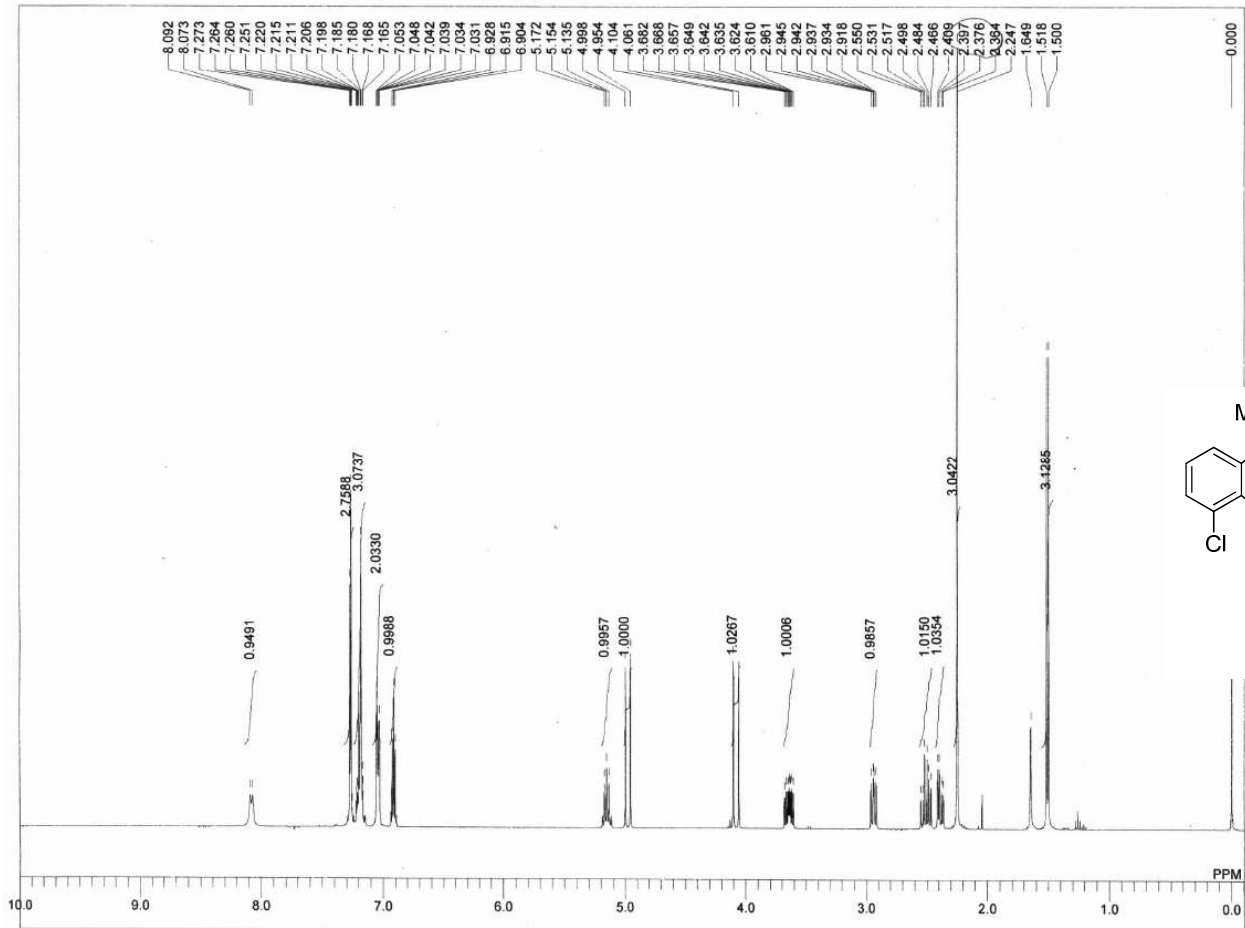

DFILE F:\Wada\42PNW2  
 COMNT Mon Dec 28 23:05  
 DATIM 1H  
 OBNUC 399.65 MHz  
 EXMOD 124.00 KHz  
 OBFRQ 10500.0 Hz  
 OBSET 32768  
 OBFIN 8000.0 Hz  
 POINT 16  
 FREQU 4.096 sec  
 SCANS 2.904 sec  
 ACQTM 6.2 us  
 PD 1H  
 PW1 23.9 c  
 IRNUC CDCL3  
 CTMP 0.00 ppm  
 SLVNT 0.12 Hz  
 EXREF 18  
 BF  
 RGAIN

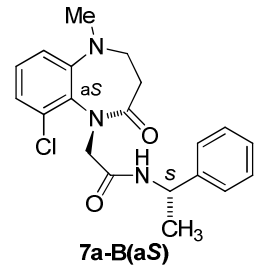

F:\Wada\42PNW2-69-51-carbon.als

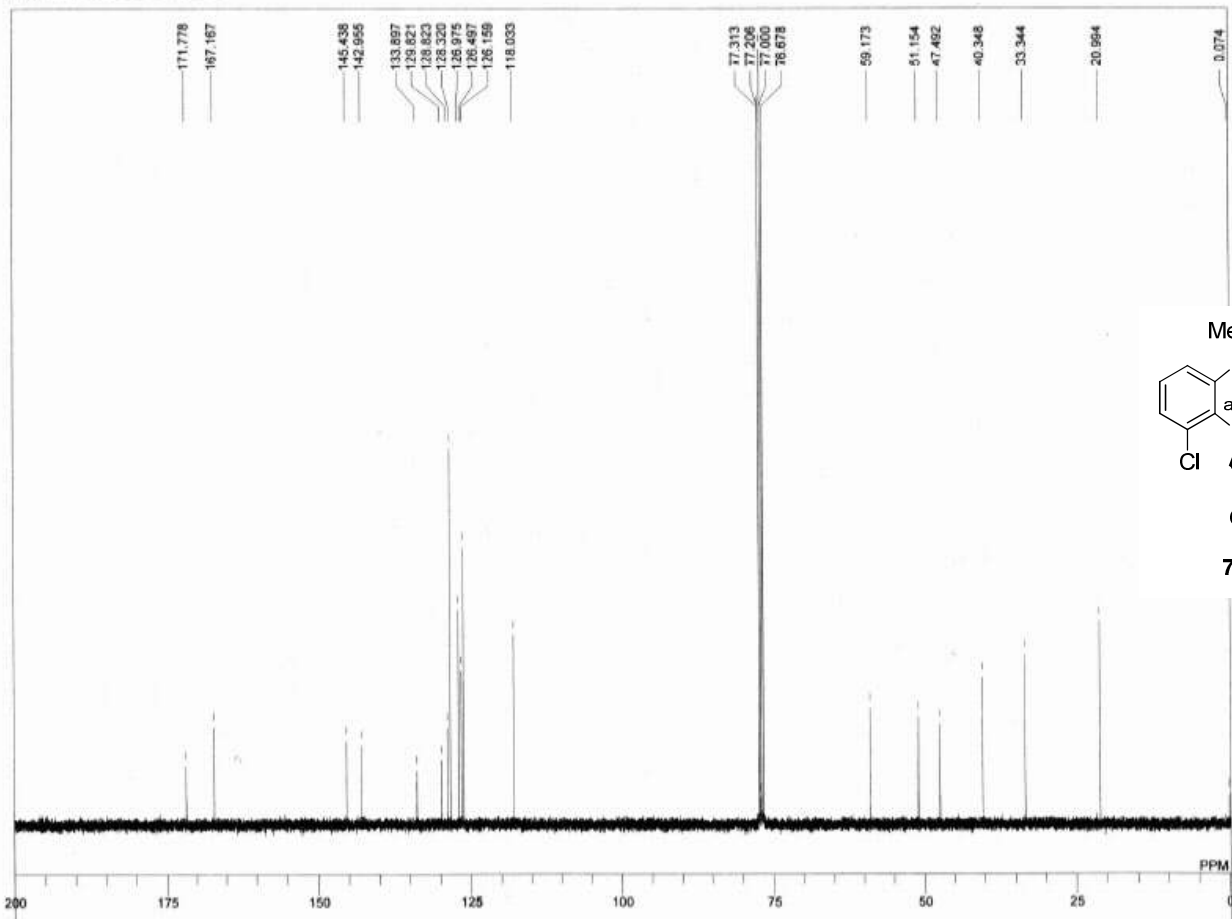

DFILE F:\Wada\42PNW2  
 COMNT Mon Dec 28 23:55  
 DATIM 13C  
 OBNUC 100.40 MHz  
 EXMOD 125.00 KHz  
 OBFRQ 10500.0 Hz  
 OBSET 32768  
 OBFIN 27173.9 Hz  
 POINT 1024  
 FREQU 1.206 sec  
 SCANS 1.794 sec  
 ACQTM 4.6 us  
 PD 1H  
 PW1 24.6 c  
 IRNUC CDCL3  
 CTMP 77.00 ppm  
 SLVNT 0.12 Hz  
 EXREF 5a  
 BF  
 RGAIN

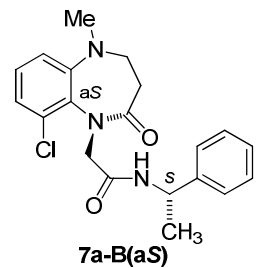

G:\Natsugari\42AHN2-69-30C.als

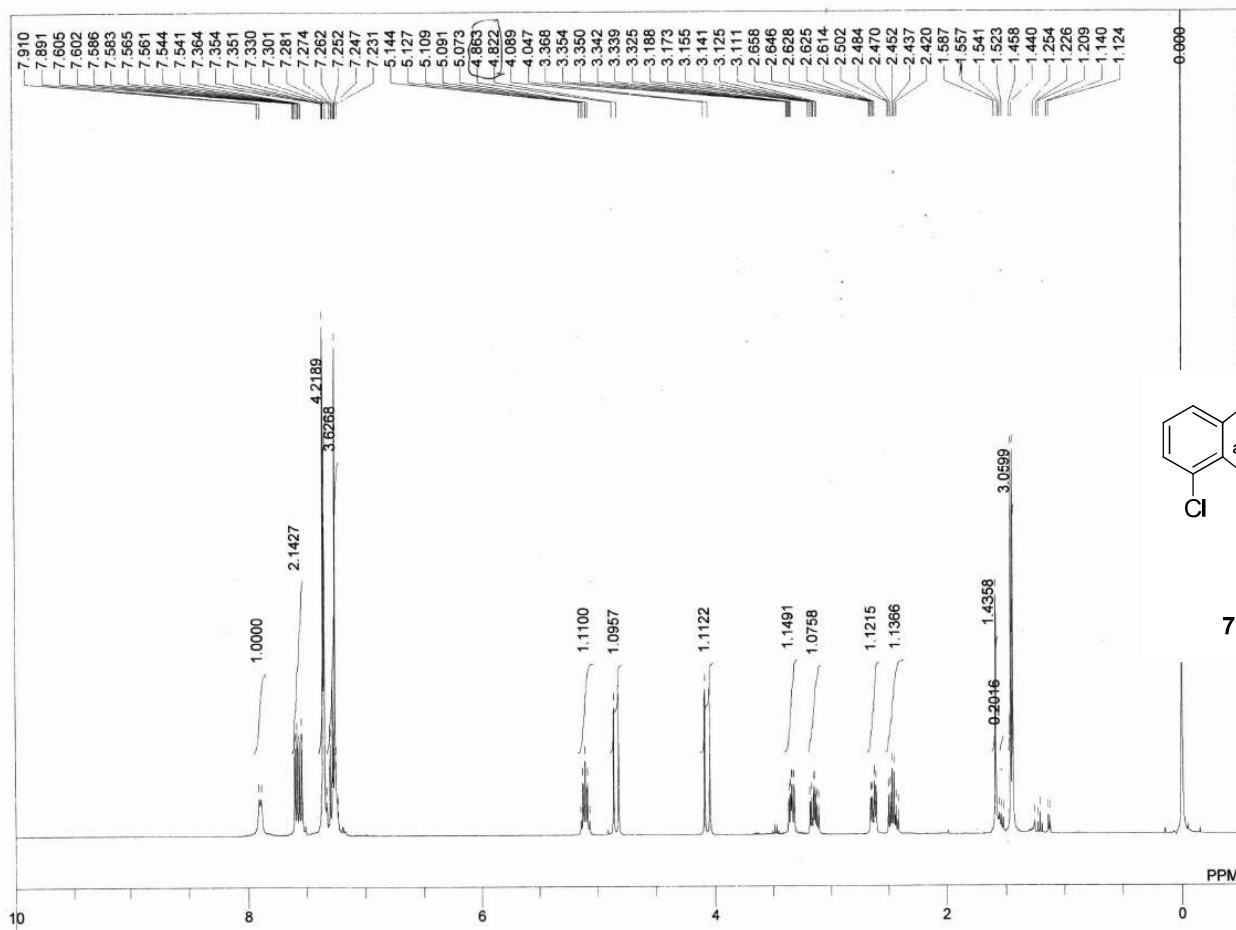

DFILE G:\Natsugari\4  
COMNT Sat Jan 12 15:  
DATIM 1H  
OBNUC NON  
EXMOD  
OBFRQ 399.65 MH  
OBSET 124.00 KHz  
OBFIN 10500.0 Hz  
POINT 32768  
FREQU 8000.0 Hz  
SCANS 64  
ACQTM 4.096 sec  
PD 2.904 sec  
PW1 6.2 us  
IRNUC 1H  
CTEMP 24.8 c  
SLVNT CDCL3  
EXREF 0.00 ppm  
BF 0.20 Hz  
RGAIN 20

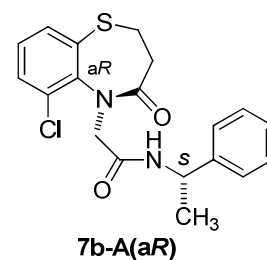

C:\ALICE95\DATA\Takada\carbon\42YYT1-167-31c.als

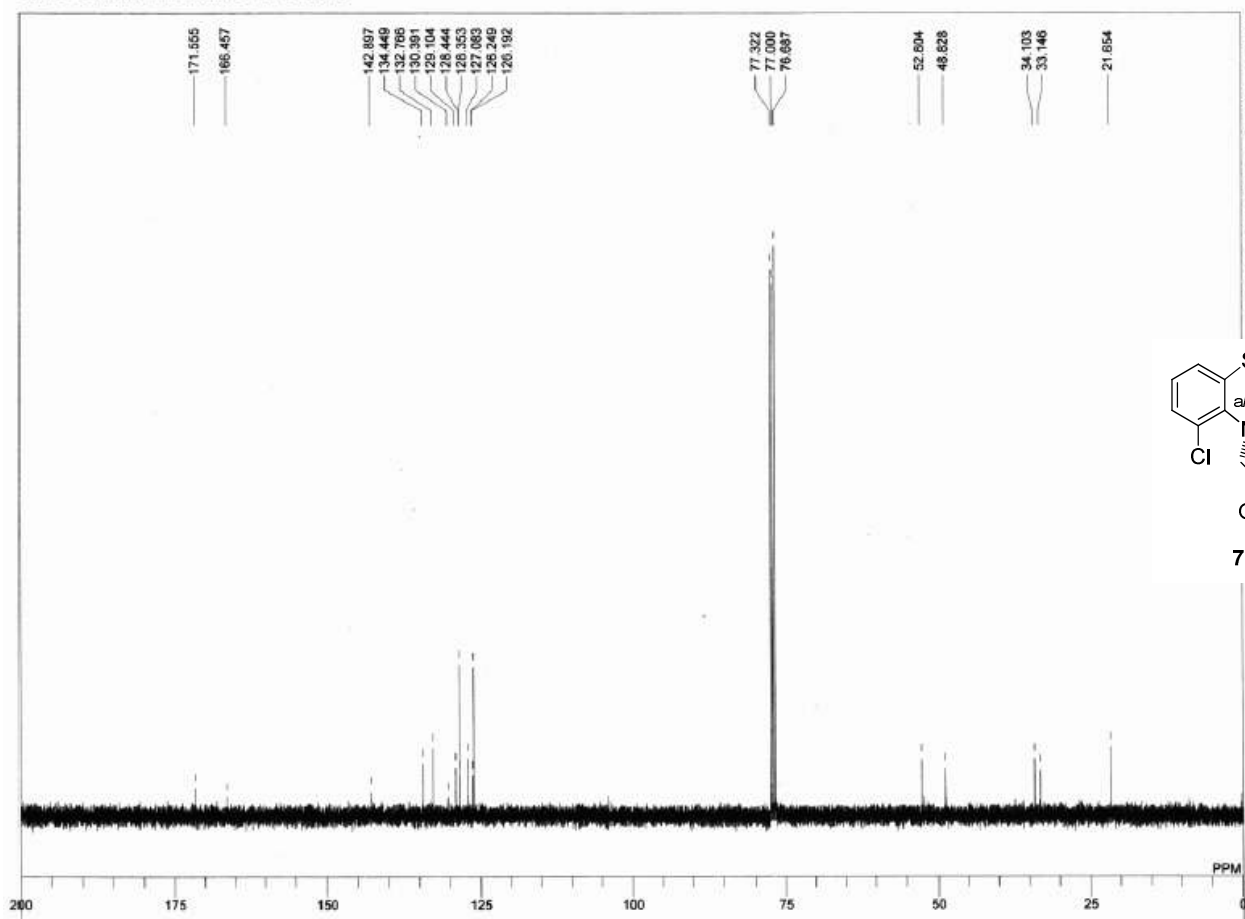

DFILE C:\ALICE95\DATA\  
COMNT Mon Aug 23 12:03:  
DATIM 13C  
OBNUC BCM  
EXMOD  
OBFRQ 100.40 MHz  
OBSET 125.00 KHz  
OBFIN 10500.0 Hz  
POINT 32768  
FREQU 27173.9 Hz  
SCANS 256  
ACQTM 1.206 sec  
PD 1.794 sec  
PW1 4.6 us  
IRNUC 1H  
CTEMP 27.4 c  
SLVNT CDCL3  
EXREF 77.00 ppm  
BF 0.12 Hz  
RGAIN 24

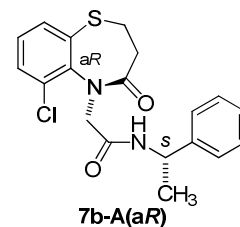

G:\Watsugari\42AHN2-69-33L.als

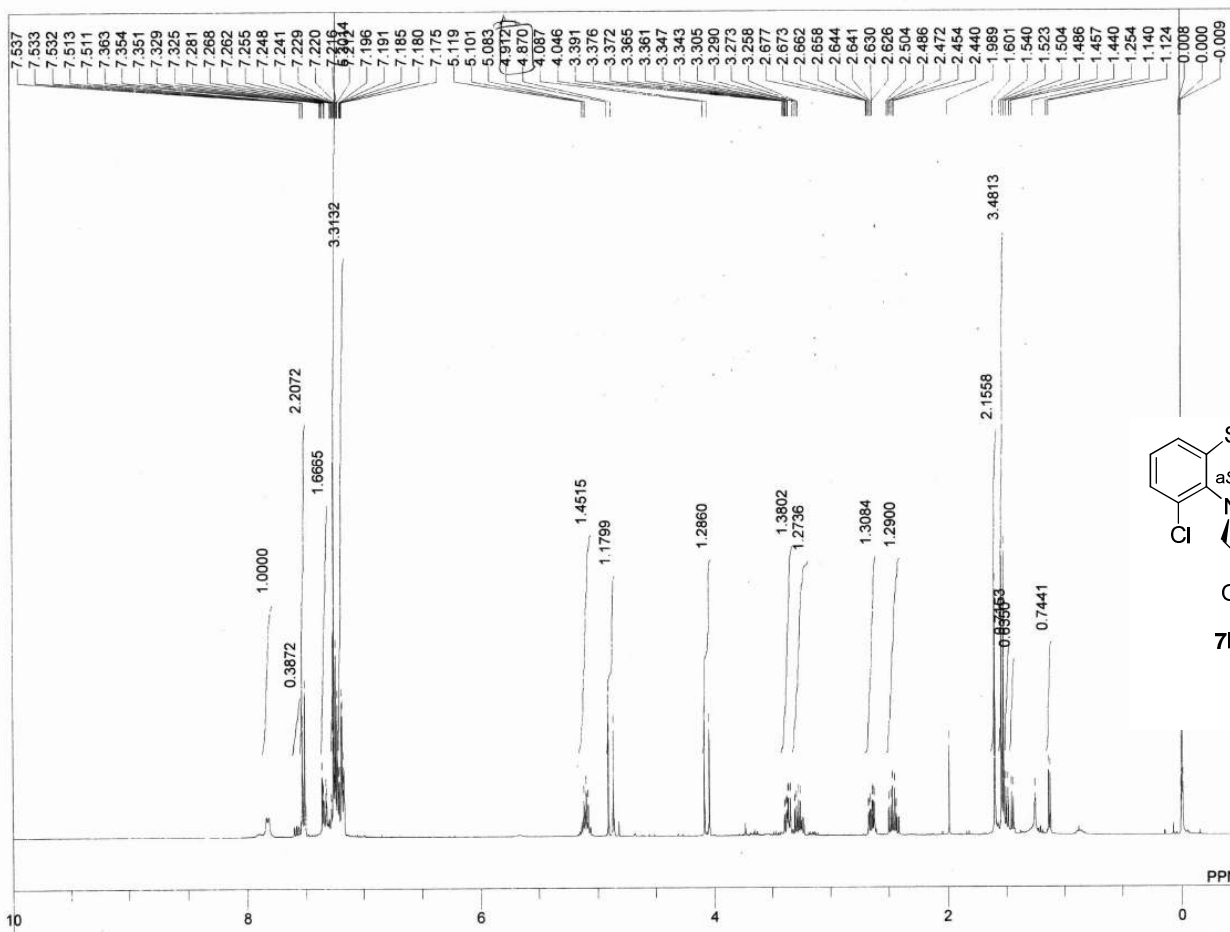

DFILE G:\Watsugari\42AHN2-69-33L.als  
 COMNT Sat Jan 12 15:  
 DATIM 1H  
 OBNUC 399.65 MHz  
 EXMOD 124.00 KHz  
 OBFRQ 10500.0 Hz  
 OBSET 32768  
 OBFIN 8000.0 Hz  
 POINT 64  
 FREQU 4.096 sec  
 SCANS 2.904 sec  
 ACQTM 6.2 us  
 PD 1H  
 PW1 24.2 c  
 IRNUC CDCL3  
 CTEMP 0.00 ppm  
 SLVNT 0.20 Hz  
 EXREF 20  
 BF  
 RGAIN

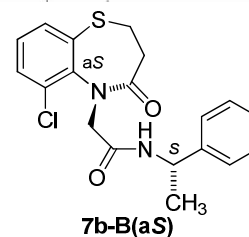

W10.20.10.243\40042\TABATA\42JHN-12.als

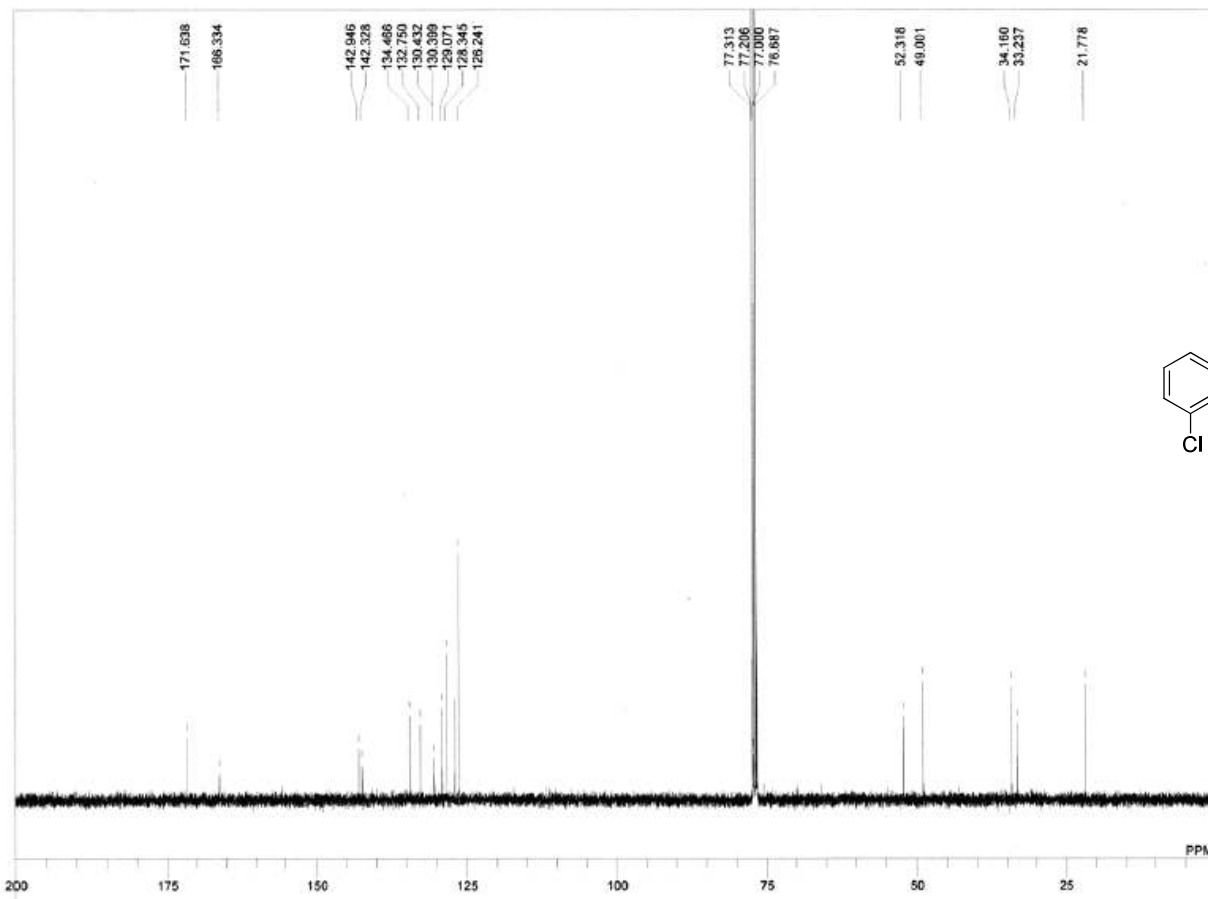

DFILE W10.20.10.243\400-  
 COMNT Mon Mar 28 13:05:  
 DATIM 13C  
 OBNUC 100.40 MHz  
 EXMOD 125.00 KHz  
 OBFRQ 10500.0 Hz  
 OBSET 32768  
 OBFIN 27173.9 Hz  
 POINT 2048  
 FREQU 1.206 sec  
 SCANS 1.794 sec  
 ACQTM 4.5 us  
 PD 1H  
 PW1 23.2 c  
 IRNUC CDCL3  
 CTEMP 77.00 ppm  
 SLVNT 0.12 Hz  
 EXREF 24  
 BF  
 RGAIN

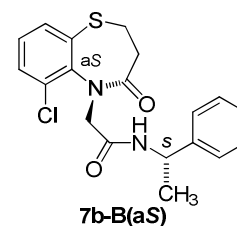

F:\Tabata\Hta9\42JHTA9-61-36-a.als

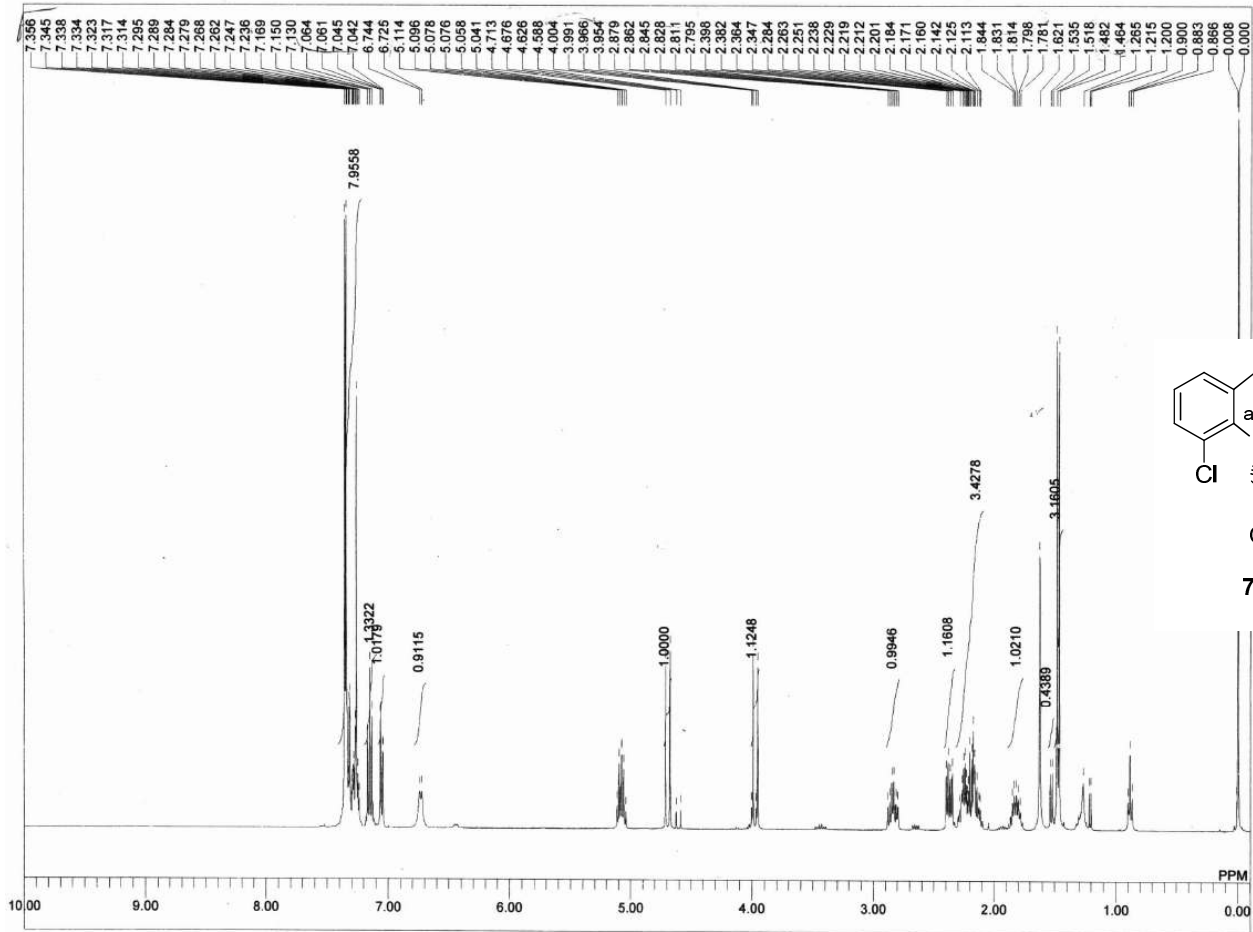

DFILE F:\Tabata\Hta9\42  
COMNT Fri Sep 03 07:04:1  
1H 1H  
NON  
OBFRQ 399.65 MHz  
OBSET 124.00 KHz  
OBFIN 10500.0 Hz  
POINT 32768  
FREQU 8000.0 Hz  
SCANS 64  
ACQTM 4.096 sec  
PD 2.904 sec  
PW1 6.2 us  
IRNUC 1H  
CTEMP 25.4 c  
SLVNT CDCL3  
EXREF 0.00 ppm  
BF 0.12 Hz  
RGAIN 19

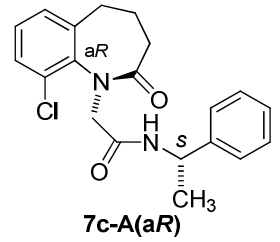

F:\Tabata\Hta9\42JHTA9-61-36-aC.als

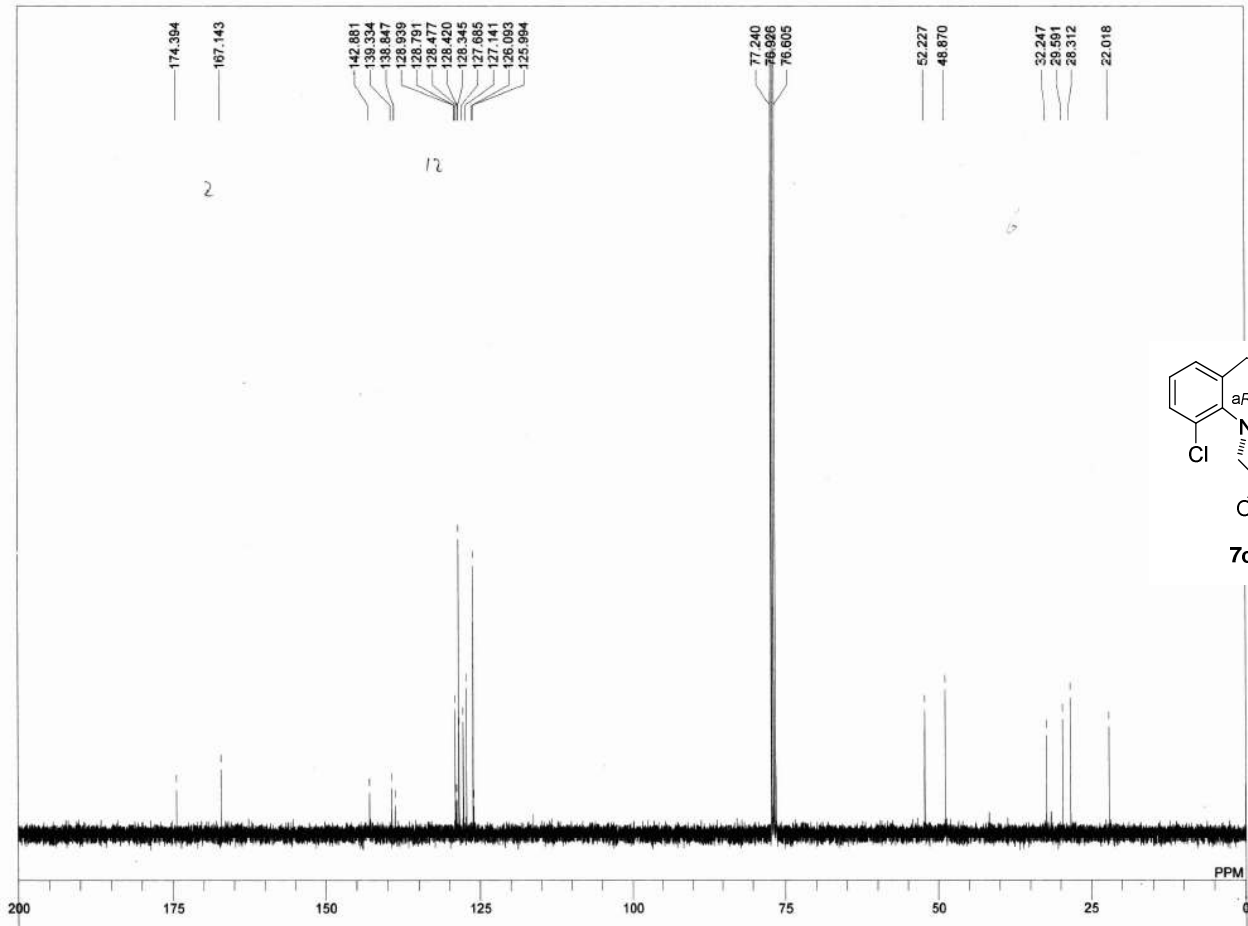

DFILE F:\Tabata\Hta9\42  
COMNT Fri Sep 03 07:31:4  
13C 13C  
BCM  
OBFRQ 100.40 MHz  
OBSET 125.00 KHz  
OBFIN 10500.0 Hz  
POINT 32768  
FREQU 27173.9 Hz  
SCANS 512  
ACQTM 1.206 sec  
PD 1.794 sec  
PW1 4.6 us  
IRNUC 1H  
CTEMP 27.4 c  
SLVNT CDCL3  
EXREF 0.00 ppm  
BF 0.12 Hz  
RGAIN 25

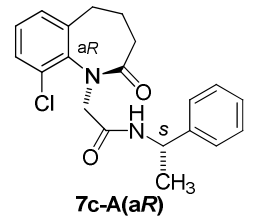

F:\Tabata\Hta9\42JHTA9-61-36-b.als

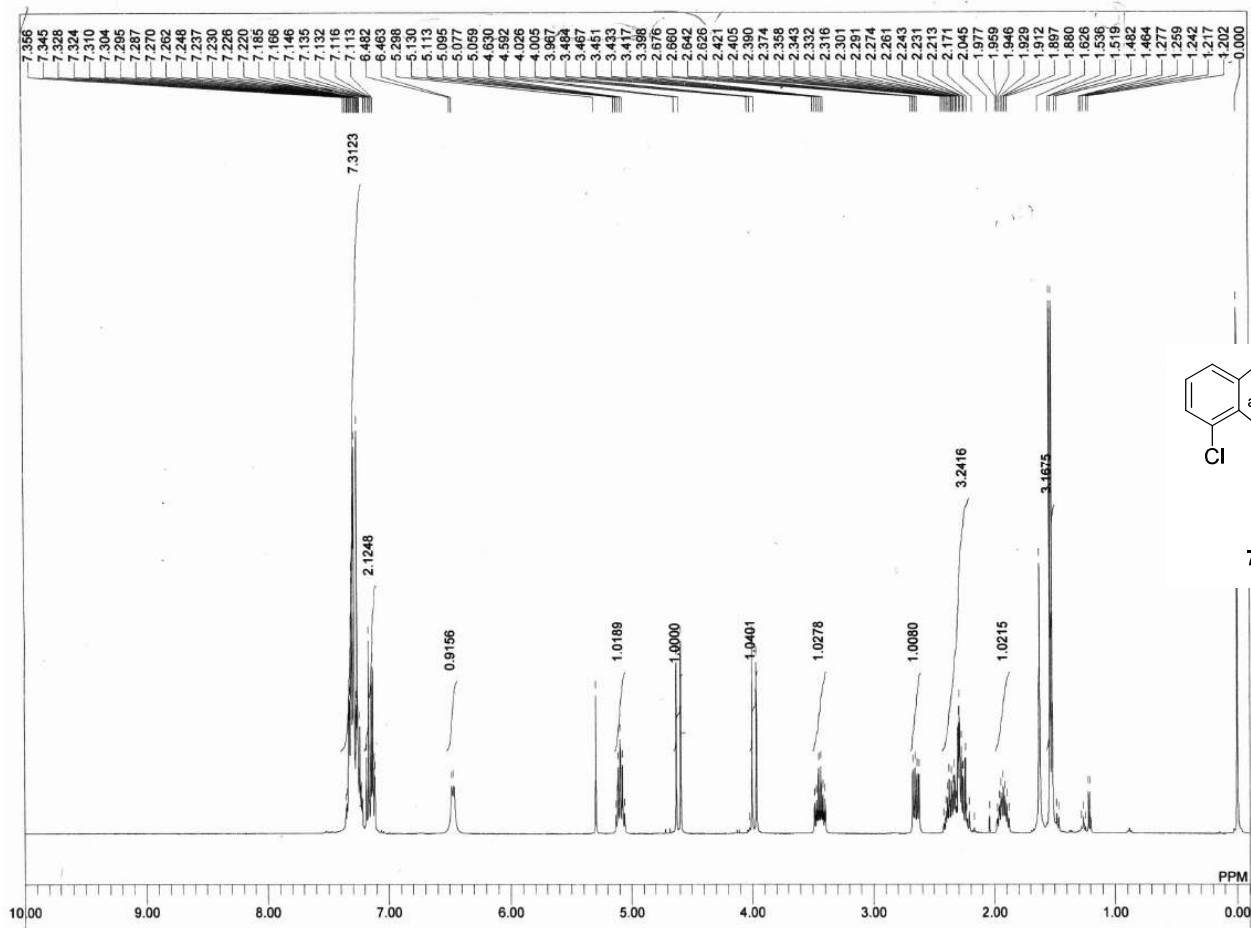

DFILE COMNT  
 DATIM  
 OBNUC  
 EXMOD  
 OBFRQ  
 OBSET  
 OBFIN  
 POINT  
 FREQU  
 SCANS  
 ACQTM  
 PD  
 PW1  
 IRNUC  
 CTEMP  
 SLVNT  
 EXREF  
 BF  
 RGAIN

F:\Tabata\Hta9\42J  
 Fri Sep 03 06:17:5  
 1H  
 NON  
 399.65 MHz  
 124.00 KHz  
 10500.0 Hz  
 32768  
 8000.0 Hz  
 64  
 4.096 sec  
 2.904 sec  
 6.2 us  
 1H  
 24.8 c  
 CDCL3  
 0.00 ppm  
 0.12 Hz  
 19

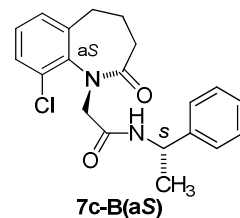

F:\Tabata\Hta9\42JHTA9-61-36-bC.als

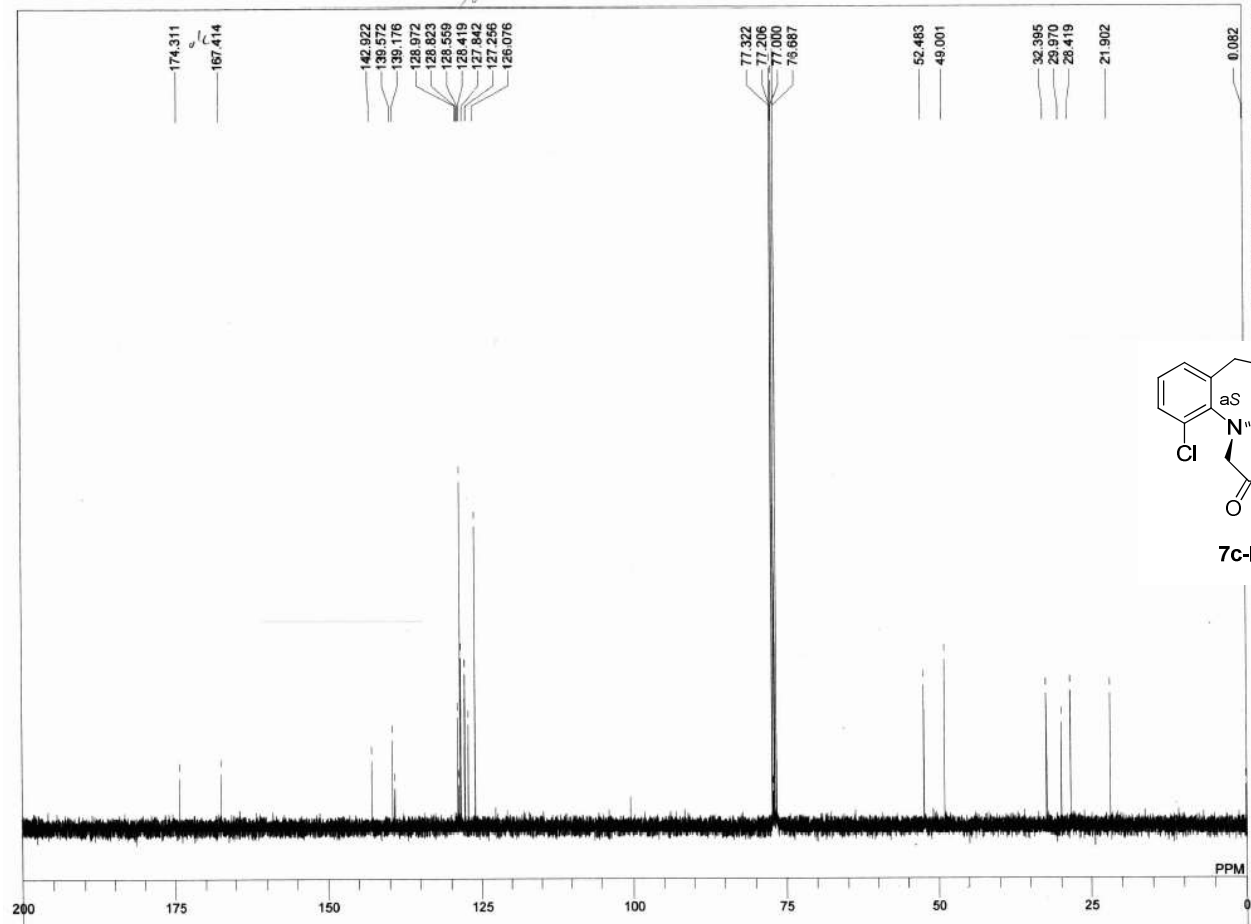

DFILE COMNT  
 DATIM  
 OBNUC  
 EXMOD  
 OBFRQ  
 OBSET  
 OBFIN  
 POINT  
 FREQU  
 SCANS  
 ACQTM  
 PD  
 PW1  
 IRNUC  
 CTEMP  
 SLVNT  
 EXREF  
 BF  
 RGAIN

F:\Tabata\Hta9\42J  
 Fri Sep 03 06:44:4  
 13C  
 BCM  
 100.40 MHz  
 125.00 KHz  
 10500.0 Hz  
 32768  
 27173.9 Hz  
 512  
 1.206 sec  
 1.794 sec  
 4.6 us  
 1H  
 25.9 c  
 CDCL3  
 77.00 ppm  
 0.12 Hz  
 25

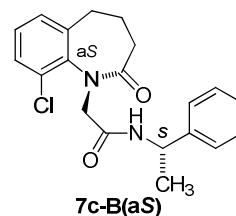

F:\Wada\42PNW3-3-37.als

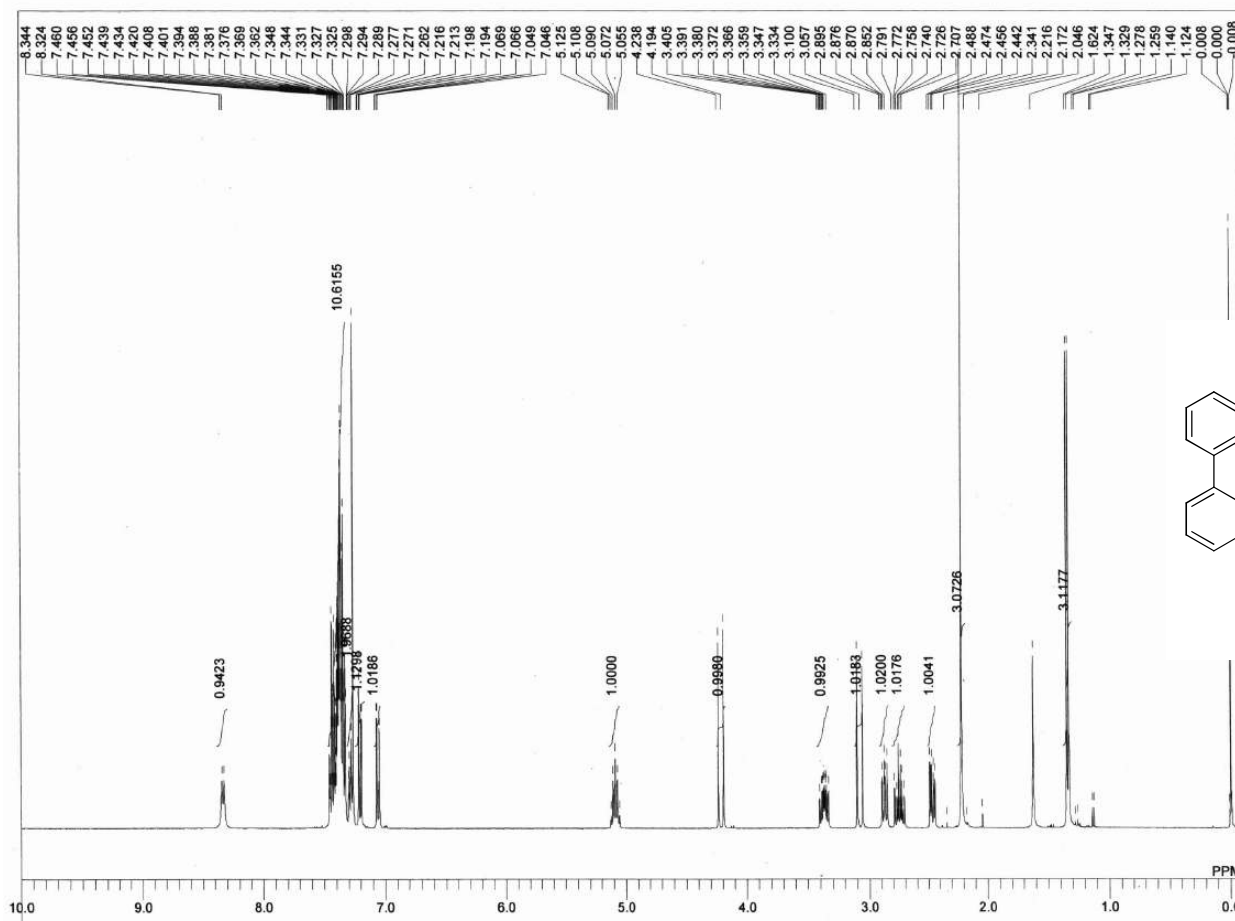

DFILE F:\Wada\42PNW3-  
 COMNT Sat Nov 21 19:50:51  
 DATIM 1H  
 OBNUC NON  
 EXMOD 399.65 MHz  
 OBFRQ 124.00 KHz  
 OBSET 10500.0 Hz  
 OBFIN 32768  
 POINT 8000.0 Hz  
 FREQU 16  
 SCANS 4.096 sec  
 ACQTM 2.904 sec  
 PD 6.2 us  
 PW1 1H  
 IRNUC 23.1 c  
 CTMP CDCl3  
 SLVNT 0.00 ppm  
 EXREF BF 0.12 Hz  
 RGAIN 19

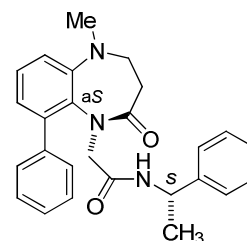

8a-A(aS)

F:\Wada\42PNW3-3-37-carbon.als

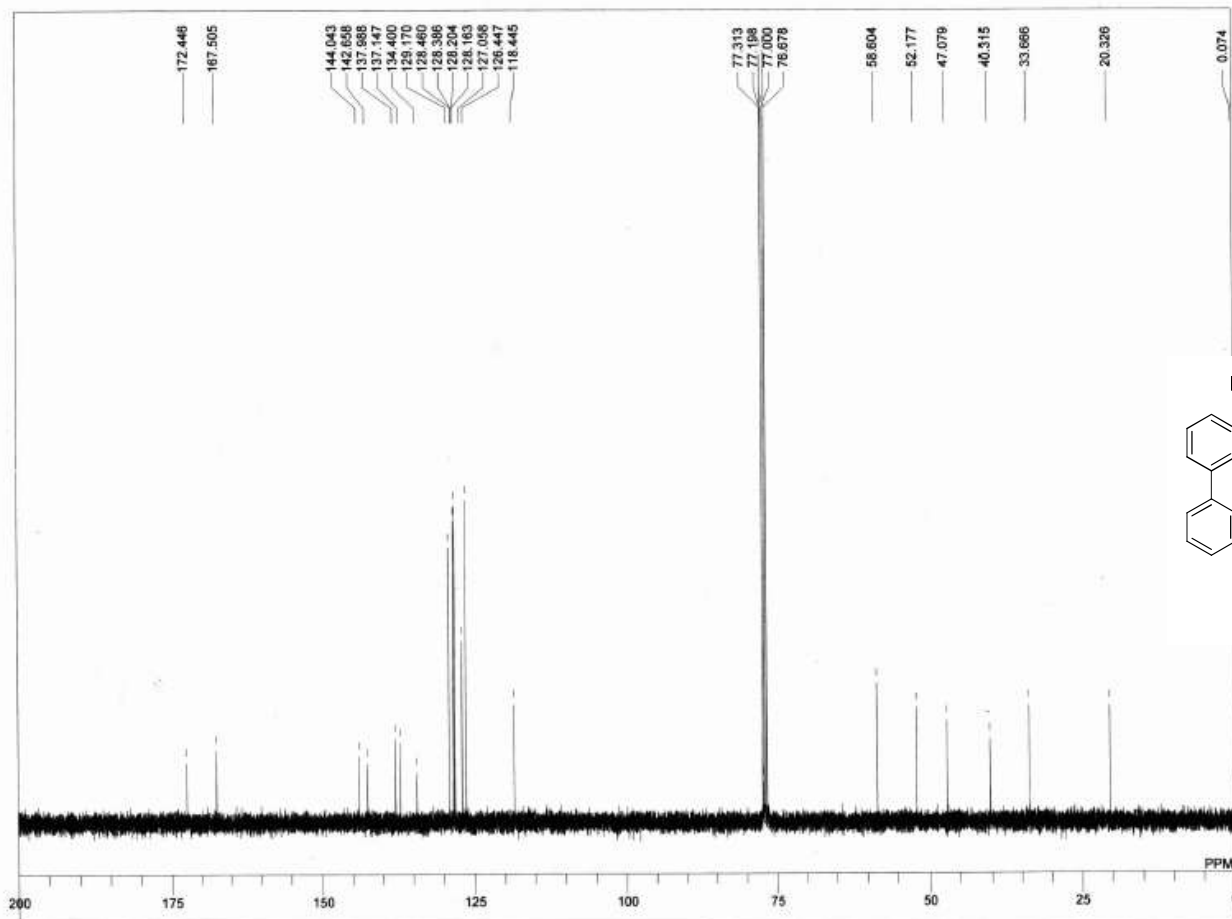

DFILE F:\Wada\42PNW3-  
 COMNT Sat Nov 21 20:17:11  
 DATIM 13C  
 OBNUC BCM  
 EXMOD 100.40 MHz  
 OBFRQ 125.00 KHz  
 OBSET 10500.0 Hz  
 OBFIN 32768  
 POINT 27173.9 Hz  
 FREQU 512  
 SCANS 1.206 sec  
 ACQTM 1.794 sec  
 PD 4.6 us  
 PW1 1H  
 IRNUC 25.2 c  
 CTMP CDCl3  
 SLVNT 77.00 ppm  
 EXREF BF 0.12 Hz  
 RGAIN 24

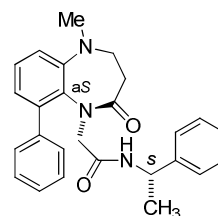

8a-A(aS)

F:\Wada\42PNW3-3-39.als

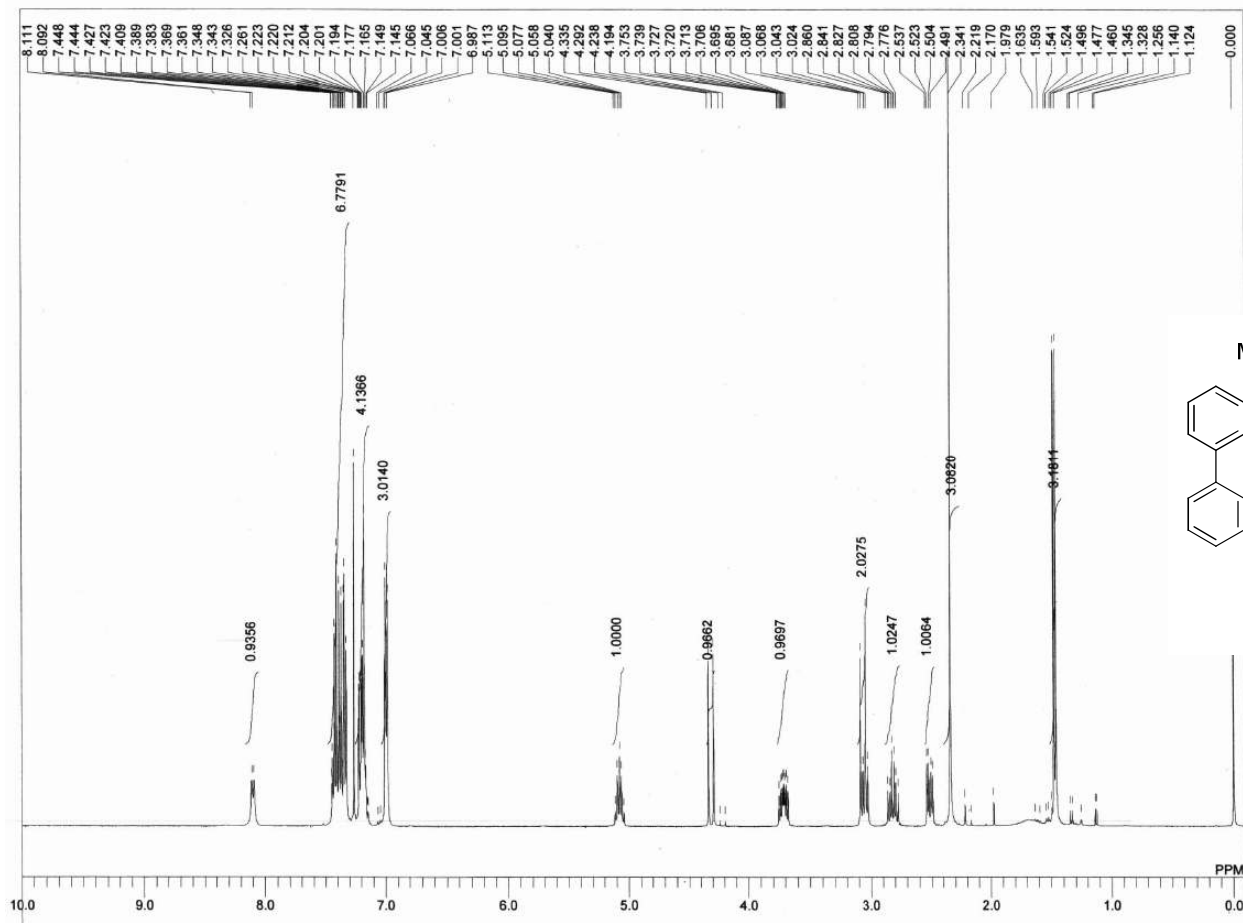

DFILE F:\Wada\42PNW3-  
 COMNT Sat Nov 21 20:23:5  
 1H  
 NON  
 OBFRQ 399.65 MHz  
 OBSET 124.00 KHz  
 OBFIN 10500.0 Hz  
 POINT 32768  
 FREQU 8000.0 Hz  
 SCANS 16  
 ACQTM 4.096 sec  
 PD 2.904 sec  
 PW1 6.2 us  
 IRNUC 1H  
 CTEMP 23.9 c  
 SLVNT CDCL3  
 EXREF 0.00 ppm  
 BF 0.12 Hz  
 RGAIN 18

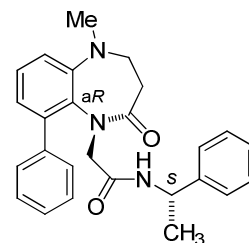

8a-B(aR)

F:\Wada\42PNW3-3-39-carbon.als

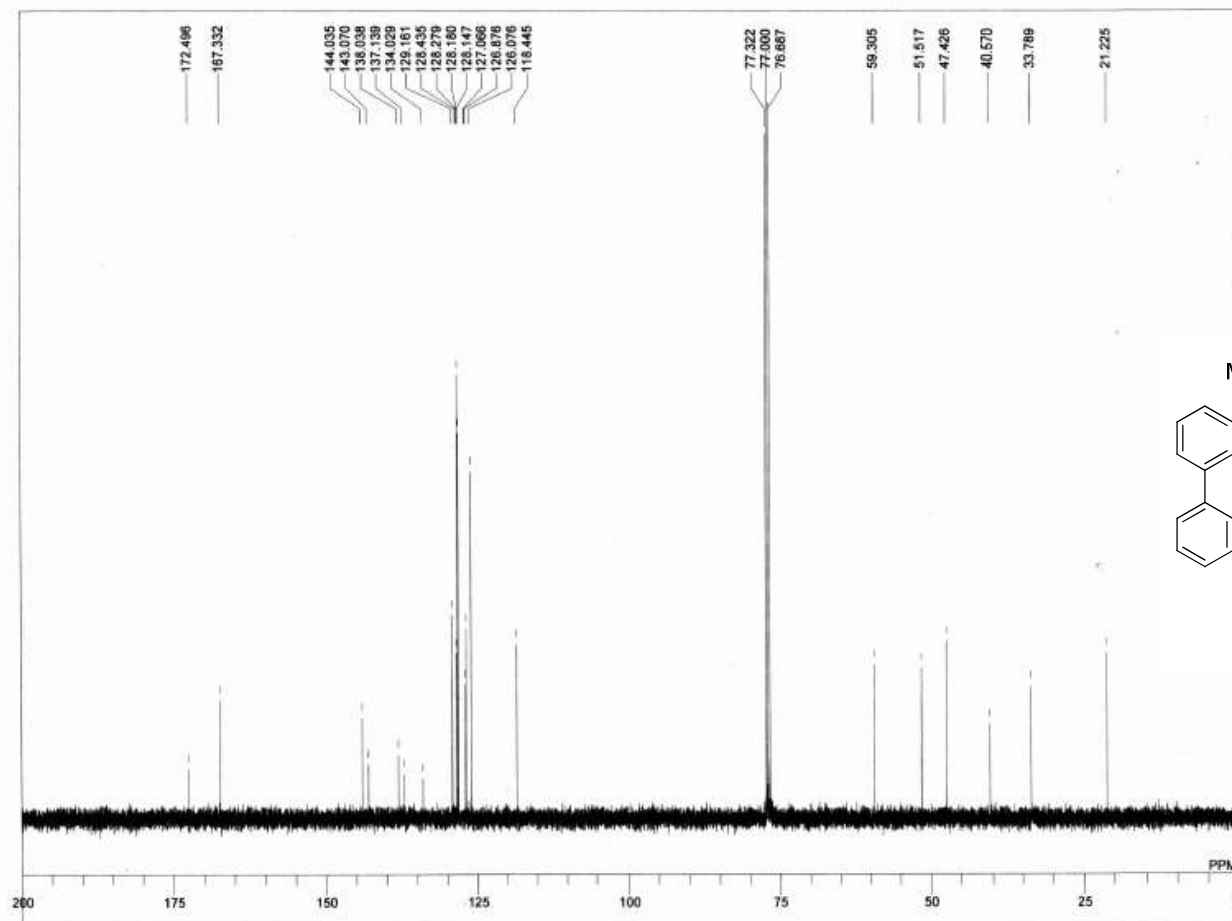

DFILE F:\Wada\42PNW3-  
 COMNT Sat Nov 21 20:50:0  
 13C  
 BCM  
 OBFRQ 100.40 MHz  
 OBSET 125.00 KHz  
 OBFIN 10500.0 Hz  
 POINT 32768  
 FREQU 27173.9 Hz  
 SCANS 512  
 ACQTM 1.206 sec  
 PD 1.794 sec  
 PW1 4.6 us  
 IRNUC 1H  
 CTEMP 25.0 c  
 SLVNT CDCL3  
 EXREF 77.00 ppm  
 BF 0.12 Hz  
 RGAIN 25

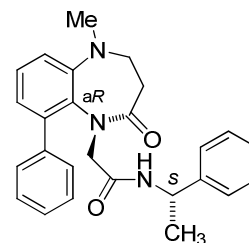

8a-B(aR)
